# Supplementary material
Source: publisher site journal article supplement (https://www.spandidos-publications.com/4304/downloadSupplementary)
Supplement: Supplementary file 1 [file downloadSupplementary]

## Sheet: Supplementary File 9
Table SXII. The number of RASEs identified in the siCtrl and siDEK conditions.
Type	ID:NIR	Chr	Ass1	Ass2	Strand	Mss1	Mss2	Isoform	KorN	siCtrl_1st.Ratio	siCtrl_1st.Alt_average_sj	siCtrl_1st.Model_average_sj	siCtrl_1st.Alt_sj	siCtrl_1st.Model_sj	siCtrl_1st.isfiltered	siCtrl_2nd.Ratio	siCtrl_2nd.Alt_average_sj	siCtrl_2nd.Model_average_sj	siCtrl_2nd.Alt_sj	siCtrl_2nd.Model_sj	siCtrl_2nd.isfiltered	siCtrl_3rd.Ratio	siCtrl_3rd.Alt_average_sj	siCtrl_3rd.Model_average_sj	siCtrl_3rd.Alt_sj	siCtrl_3rd.Model_sj	siCtrl_3rd.isfiltered	siDEK_1st.Ratio	siDEK_1st.Alt_average_sj	siDEK_1st.Model_average_sj	siDEK_1st.Alt_sj	siDEK_1st.Model_sj	siDEK_1st.isfiltered	siDEK_2nd.Ratio	siDEK_2nd.Alt_average_sj	siDEK_2nd.Model_average_sj	siDEK_2nd.Alt_sj	siDEK_2nd.Model_sj	siDEK_2nd.isfiltered	siDEK_3rd.Ratio	siDEK_3rd.Alt_average_sj	siDEK_3rd.Model_average_sj	siDEK_3rd.Alt_sj	siDEK_3rd.Model_sj	siDEK_3rd.isfiltered	P-value	Tvalue	DiffType	Gene
3pMXE	known_NIR_1378	chr1	44645464	44660174	-	44655209	44660174	ENST00000372237.7	known	0.15	4	23	4	23	y	0.14	3	18	3	18	y	0.22	8	28	8	28	y	0.07	2	27	2	27	y	0	0	24	0	24	n	0	0	6	0	6	n	0.0130713	-4.27366	down	ENSG00000126106.13
3pMXE	known_NIR_8077	chr19	44874478	44882211	+	44874478	44878223	ENST00000252485.8	known	0.3	315	746	315	746	y	0.29	373	909	373	909	y	0.31	585	1317	585	1317	y	0.23	299	978	299	978	y	0.26	370	1037	370	1037	y	0.27	382	1043	382	1043	y	0.0421716	-3.5	down	ENSG00000130202.9
3pMXE	known_NIR_13360	chr7	30062742	30129266	+	30062742	30090153	ENST00000258679.11	known	1	1	0	1	0	n	0.86	6	1	6	1	n	0.8	8	2	8	2	y	0.6	3	2	3	2	n	0.57	4	3	4	3	n	0.54	7	6	7	6	y	0.0256688	-5.12952	down	ENSG00000106086.18
3pMXE	known_NIR_14436	chr9	152078	156481	-	154795	156481	ENST00000377447.7	known	0.11	19	161	19	161	y	0.13	15	101	15	101	y	0.11	25	196	25	196	y	0.04	4	88	4	88	y	0.05	5	88	5	88	y	0.06	9	136	9	136	y	0.00177857	-7.55929	down	ENSG00000172785.18
3pMXE	novel_NIR_8882	chr13	27622009	27665686	+	27622009	27622841	ENST00000399696.3	novel	0.22	4	14	4	14	y	0.44	4	5	4	5	y	0.3	6	14	6	14	y	0	0	3	0	3	n	0	0	2	0	2	n	0	0	5	0	5	n	0.0380742	-4.97737	down	ENSG00000186184.15
3pMXE	novel_NIR_23878	chr3	15414162	15415498	-	15414914	15415498	ENST00000383789.9	novel	0.6	3	2	3	2	y	0.4	2	3	2	3	y	0.67	14	7	14	7	y	0	0	2	0	2	n	0.22	2	7	2	7	y	0.33	6	12	6	12	y	0.0434234	-2.95557	down	ENSG00000206562.11
3pMXE	novel_NIR_33857	chrX	109629579	109659354	-	109644186	109659354	ENST00000469796.6	novel	0.24	8	25	8	25	y	0.36	4	7	4	7	y	0.17	4	20	4	20	y	0	0	12	0	12	n	0	0	16	0	16	n	0.07	1	14	1	14	n	0.0369429	-3.87694	down	ENSG00000068366.19
3pMXE	known_NIR_3644	chr12	56160320	56161387	+	56160320	56160626	ENST00000548293.5	known	0.62	14054	8779	14054	8779	y	0.61	17992	11615	17992	11615	y	0.62	22153	13650	22153	13650	y	0.67	15725	7831	15725	7831	y	0.66	17745	9084	17745	9084	y	0.67	19216	9659	19216	9659	y	0.000447238	10.6066	up	ENSG00000092841.18
3pMXE	known_NIR_4043	chr13	52012462	52018913	+	52012462	52015783	ENST00000616513.1	known	0.73	11	4	11	4	y	0.74	14	5	14	5	y	0.84	27	5	27	5	y	1	19	0	19	0	n	0.9	9	1	9	1	n	0.94	30	2	30	2	y	0.0191039	3.87574	up	ENSG00000253710.2
3pMXE	known_NIR_5275	chr16	14950255	14951615	+	14950255	14950752	ENST00000618714.4	known	0.68	324	153	324	153	y	0.7	332	144	332	144	y	0.74	499	171	499	171	y	0.81	379	87	379	87	y	0.78	439	123	439	123	y	0.84	446	87	446	87	y	0.0139275	4.18004	up	ENSG00000183426.15
3pMXE	known_NIR_5306	chr16	18358588	18359948	-	18359451	18359948	ENST00000531453.6	known	0.54	337	291	337	291	y	0.53	339	301	339	301	y	0.57	517	394	517	394	y	0.63	390	232	390	232	y	0.63	446	266	446	266	y	0.69	458	207	458	207	y	0.0177269	4.42857	up	ENSG00000233024.7
3pMXE	known_NIR_8393	chr19	53432028	53445001	+	53432028	53441796	ENST00000424846.3	known	0.56	9	7	9	7	y	0.4	4	6	4	6	y	0.48	13	14	13	14	y	1	8	0	8	0	n	0.8	12	3	12	3	y	1	13	0	13	0	n	0.00705097	5.58957	up	ENSG00000241015.2
3pMXE	known_NIR_8396	chr19	53449638	53454650	+	53449638	53449879	ENST00000610928.4	known	0.04	1	25	1	25	n	0	0	63	0	63	n	0.03	1	38	1	38	n	0.12	6	46	6	46	y	0.08	4	44	4	44	y	0.13	7	46	7	46	y	0.0126157	4.45896	up	ENSG00000160336.14
3pMXE	known_NIR_10497	chr22	39102042	39103692	+	39102042	39102512	ENST00000613677.4	known	0.56	39	31	39	31	y	0.5	16	16	16	16	y	0.48	23	25	23	25	y	0.78	21	6	21	6	y	0.67	26	13	26	13	y	0.7	30	13	30	13	y	0.00940135	4.99731	up	ENSG00000100298.15
3pMXE	known_NIR_11340	chr3	58412963	58424752	+	58412963	58420536	ENST00000383715.8	known	0.75	24	8	24	8	y	0.67	10	5	10	5	y	0.8	37	9	37	9	y	0.93	42	3	42	3	y	0.94	31	2	31	2	y	0.85	28	5	28	5	y	0.0276449	3.51799	up	ENSG00000168297.15
3pMXE	novel_NIR_6820	chr12	102124041	102153869	+	102124041	102148230	ENST00000537257.5	novel	0.11	2	17	2	17	n	0	0	4	0	4	n	0	0	23	0	23	n	0.36	8	14	8	14	y	0.18	3	14	3	14	y	0.4	6	9	6	9	y	0.0353103	3.59513	up	ENSG00000185480.11
3pMXE	novel_NIR_8609	chr12	95028509	95031349	-	95030873	95031349	ENST00000330677.7	novel	0.2	1	4	1	4	n	0	0	10	0	10	n	0.56	9	7	9	7	y	1	2	0	2	0	y	-	-	-	-	-	-	1	3	0	3	0	y	0.0449302	4.55722	up	ENSG00000120798.16
3pMXE	novel_NIR_8843	chr13	23668082	23673372	+	23668082	23668692	ENST00000382258.8	novel	0.1	3	26	3	26	n	0.08	2	22	2	22	n	0.17	5	25	5	25	y	0.23	6	20	6	20	y	0.19	4	17	4	17	y	0.3	6	14	6	14	y	0.0444191	2.92511	up	ENSG00000127863.15
3pMXE	novel_NIR_16288	chr19	17492392	17511343	-	17503622	17511343	ENST00000595116.1	novel	0	0	6	0	6	n	0	0	4	0	4	n	0	0	2	0	2	n	0.33	2	4	2	4	y	0.38	3	5	3	5	y	-	-	-	-	-	-	0.0447585	14.2	up	ENSG00000269439.5
3pMXE	novel_NIR_26147	chr4	75914985	75919909	-	75917773	75919909	ENST00000507956.5	novel	0.25	1	3	1	3	n	0.33	2	4	2	4	y	0.5	1	1	1	1	n	1	2	0	2	0	y	0.91	10	1	10	1	y	0.7	7	3	7	3	y	0.0124429	4.41673	up	ENSG00000138744.14
3pMXE	novel_NIR_34310	chrX	3818500	3899216	-	3893351	3899216	ENST00000424415.1	novel	0.75	39	13	39	13	y	0.52	15	14	15	14	y	0.57	41	31	41	31	y	0.8	51	13	51	13	y	0.84	36	7	36	7	y	0.97	58	2	58	2	y	0.0461781	2.96154	up	ENSG00000205663.5
5pMXE	known_NIR_2354	chr11	45917493	45918122	-	45917493	45917700	ENST00000241041.7	known	0.03	3	100	3	100	y	0.06	7	114	7	114	y	0.04	7	168	7	168	y	0	0	105	0	105	n	0.02	3	167	3	167	y	0	0	163	0	163	n	0.032811	-3.31662	down	ENSG00000121680.15
5pMXE	known_NIR_5528	chr16	30526051	30526742	-	30526051	30526326	ENST00000380412.6	known	0.11	10	84	10	84	y	0.19	29	120	29	120	y	0.12	19	133	19	133	y	0.01	1	76	1	76	n	0.03	3	106	3	106	y	0.03	3	91	3	91	y	0.0362049	-4.48129	down	ENSG00000169957.9
5pMXE	known_NIR_6513	chr17	48077041	48101268	-	48077041	48100755	ENST00000393408.7	known	1	103	0	103	0	n	1	82	0	82	0	n	0.94	186	11	186	11	y	0.91	150	15	150	15	y	0.86	129	21	129	21	y	0.92	120	10	120	10	y	0.0381486	-3.05424	down	ENSG00000108468.14
5pMXE	known_NIR_8385	chr19	52614797	52618936	-	52614797	52616718	ENST00000541777.6	known	0.77	10	3	10	3	y	1	8	0	8	0	n	0.7	7	3	7	3	y	0.43	3	4	3	4	n	0.56	5	4	5	4	n	0.33	2	4	2	4	n	0.0309094	-3.409	down	ENSG00000167766.18
5pMXE	known_NIR_8538	chr19	58571429	58573373	-	58571429	58573055	ENST00000594234.5	known	0.41	9	13	9	13	y	0.4	6	9	6	9	y	0.32	8	17	8	17	y	0.1	2	19	2	19	y	0.21	4	15	4	15	y	0.23	3	10	3	10	y	0.0202243	-3.97778	down	ENSG00000099326.8
5pMXE	known_NIR_10114	chr21	37072537	37072991	-	37072537	37072848	ENST00000399102.5	known	0.6	3	2	3	2	n	0.48	15	16	15	16	y	0.56	14	11	14	11	y	0	0	1	0	1	n	-	-	-	-	-	-	0	0	5	0	5	n	0.00413836	-15.4965	down	ENSG00000185808.13
5pMXE	known_NIR_13157	chr7	12687043	12688169	+	12687728	12688169	ENST00000404894.1	known	0.62	8	5	8	5	y	0.83	10	2	10	2	y	0.64	25	14	25	14	y	0.26	5	14	5	14	y	0.3	14	32	14	32	y	0.36	13	23	13	23	y	0.0162399	-5.34587	down	ENSG00000122644.12
5pMXE	known_NIR_13929	chr8	18210180	18219411	+	18212774	18219411	ENST00000517492.5	known	0.91	20	2	20	2	y	1	5	0	5	0	n	1	19	0	19	0	n	0.86	6	1	6	1	n	0.85	11	2	11	2	y	0.78	18	5	18	5	y	0.0244575	-3.57528	down	ENSG00000171428.13
5pMXE	known_NIR_14390	chr9	133112152	133148963	-	133112152	133120972	ENST00000372050.7	known	1	6	0	6	0	n	1	4	0	4	0	n	1	11	0	11	0	n	0.6	6	4	6	4	y	0.62	8	5	8	5	y	-	-	-	-	-	-	0.01632	-39	down	ENSG00000160271.14
5pMXE	novel_NIR_6447	chr11	73808350	73844807	+	73843367	73844807	ENST00000314282.7	novel	0.3	6	14	6	14	y	0.29	6	15	6	15	y	0.23	5	17	5	17	y	0	0	11	0	11	n	0	0	12	0	12	n	0.05	1	18	1	18	n	0.00100511	-9.33762	down	ENSG00000175581.13
5pMXE	novel_NIR_6610	chr11	843669	847201	+	844186	847201	ENST00000397406.5	novel	0.17	2	10	2	10	y	0.24	4	13	4	13	y	0.17	4	19	4	19	y	0.07	1	13	1	13	n	0	0	24	0	24	n	0	0	12	0	12	n	0.00673617	-5.15178	down	ENSG00000214063.10
5pMXE	novel_NIR_6611	chr11	843669	847201	+	844587	847201	ENST00000397404.5	novel	0.12	2	14	2	14	n	0.21	4	15	4	15	y	0.15	4	23	4	23	y	0.02	1	42	1	42	n	0	0	27	0	27	n	0	0	16	0	16	n	0.0229685	-5.61979	down	ENSG00000214063.10
5pMXE	novel_NIR_10719	chr15	41397140	41402447	-	41397140	41402144	ENST00000260361.8	novel	0.28	7	18	7	18	y	0.33	7	14	7	14	y	0.3	10	23	10	23	y	0.19	3	13	3	13	y	0.07	1	14	1	14	n	0.1	3	26	3	26	n	0.0240434	-4.71621	down	ENSG00000137806.8
5pMXE	novel_NIR_11530	chr15	99228732	99249417	-	99228732	99241365	ENST00000262074.8	novel	1	6	0	6	0	y	1	2	0	2	0	y	0.5	2	2	2	2	y	0.2	2	8	2	8	y	0	0	2	0	2	n	0.2	2	8	2	8	y	0.0379607	-3.8996	down	ENSG00000103852.12
5pMXE	novel_NIR_14404	chr17	4950630	4951828	+	4951224	4951828	ENST00000323997.10	novel	0.91	10	1	10	1	y	0.81	13	3	13	3	y	0.92	11	1	11	1	y	0.46	6	7	6	7	y	0.57	8	6	8	6	y	0.5	2	2	2	2	y	0.00152546	-7.77155	down	ENSG00000108515.17
5pMXE	novel_NIR_17077	chr19	40714635	40715707	-	40714635	40715053	ENST00000243583.10	novel	0.22	2	7	2	7	y	0.2	1	4	1	4	n	0.22	2	7	2	7	y	0	0	10	0	10	n	0	0	11	0	11	n	0	0	5	0	5	n	0.000975134	-32	down	ENSG00000123815.11
5pMXE	novel_NIR_17446	chr19	47046685	47048701	-	47046685	47048407	ENST00000253047.6	novel	0.5	488	486	488	486	y	0.45	644	786	644	786	y	0.44	807	1048	807	1048	y	0.38	459	754	459	754	y	0.38	510	827	510	827	y	0.38	493	810	493	810	y	0.0461905	-4.49013	down	ENSG00000130748.6
5pMXE	novel_NIR_26981	chr5	168231056	168269278	-	168231056	168232304	ENST00000519795.1	novel	0.6	3	2	3	2	y	0.67	2	1	2	1	y	0.41	7	10	7	10	y	0.33	3	6	3	6	y	0	0	5	0	5	n	0	0	3	0	3	n	0.033798	-3.34175	down	ENSG00000253978.1
5pMXE	novel_NIR_28174	chr6	138691956	138694393	+	138692617	138694393	ENST00000432673.1	novel	0.67	8	4	8	4	y	0.36	5	9	5	9	y	0.35	9	17	9	17	y	0	0	7	0	7	n	0	0	4	0	4	n	0	0	6	0	6	n	0.048389	-4.3793	down	ENSG00000225177.5
5pMXE	known_NIR_1031	chr1	228108321	228108955	-	228108321	228108437	ENST00000366734.5	known	0.59	43	30	43	30	y	0.68	79	37	79	37	y	0.63	83	48	83	48	y	0.77	76	23	76	23	y	0.74	108	38	108	38	y	0.71	78	32	78	32	y	0.033528	3.41121	up	ENSG00000162910.18
5pMXE	known_NIR_4169	chr14	104792722	104795484	-	104792722	104793127	ENST00000402615.6	known	0.26	18	52	18	52	y	0.22	16	56	16	56	y	0.15	19	105	19	105	y	0.32	37	79	37	79	y	0.41	48	68	48	68	y	0.41	47	69	47	69	y	0.0182118	3.8663	up	ENSG00000142208.15
5pMXE	known_NIR_5541	chr16	3065494	3065784	+	3065710	3065784	ENST00000444393.7	known	0.65	275	146	275	146	y	0.68	353	163	353	163	y	0.68	414	194	414	194	y	0.73	405	147	405	147	y	0.72	476	189	476	189	y	0.71	430	176	430	176	y	0.0198868	4.33013	up	ENSG00000008517.16
5pMXE	known_NIR_5930	chr16	80997429	81006734	-	80997429	80998285	ENST00000564249.5	known	0.97	195	5	195	5	y	0.96	302	11	302	11	y	0.97	451	13	451	13	y	0.98	306	6	306	6	y	0.99	296	4	296	4	y	0.99	393	5	393	5	y	0.0132356	4.24264	up	ENSG00000103121.8
5pMXE	known_NIR_9668	chr20	35272145	35279566	-	35272145	35278046	ENST00000433764.5	known	0	0	2	0	2	n	0	0	2	0	2	n	0	0	2	0	2	n	1	2	0	2	0	n	0.73	8	3	8	3	y	0.43	3	4	3	4	n	0.0485043	4.37369	up	ENSG00000126005.15
5pMXE	known_NIR_11000	chr3	196939432	196942426	-	196939432	196942160	ENST00000447325.5	known	0.95	120	6	120	6	y	0.93	148	11	148	11	y	0.96	268	12	268	12	y	0.98	132	3	132	3	y	0.98	128	3	128	3	y	1	155	0	155	0	n	0.0253033	3.61814	up	ENSG00000114503.10
5pMXE	known_NIR_11647	chr4	39045096	39075965	+	39063035	39075965	ENST00000504108.5	known	0.73	19	7	19	7	y	0.8	8	2	8	2	y	0.72	18	7	18	7	y	0.86	18	3	18	3	y	0.93	14	1	14	1	n	0.93	14	1	14	1	n	0.0104372	4.56504	up	ENSG00000109790.16
5pMXE	novel_NIR_3311	chr1	94679607	94819956	-	94679607	94732258	ENST00000432162.5	novel	0.25	2	6	2	6	y	0	0	2	0	2	n	0	0	5	0	5	n	0.6	3	2	3	2	y	0.53	10	9	10	9	y	0.36	4	7	4	7	y	0.0204736	3.76971	up	ENSG00000224081.7
5pMXE	novel_NIR_5543	chr11	36594641	36610081	+	36594915	36610081	ENST00000617650.4	novel	0.77	20	6	20	6	y	0.83	25	5	25	5	y	0.7	67	29	67	29	y	1	51	0	51	0	y	0.85	28	5	28	5	y	1	24	0	24	0	y	0.0468625	2.93151	up	ENSG00000166352.15
5pMXE	novel_NIR_10914	chr15	55234956	55289716	-	55234956	55270165	ENST00000396307.6	novel	0	0	42	0	42	n	0	0	38	0	38	n	0.1	10	95	10	95	n	0.26	9	25	9	25	y	0.16	6	32	6	32	y	0.25	14	41	14	41	y	0.0146269	4.12438	up	ENSG00000069974.15
5pMXE	novel_NIR_17656	chr19	49663258	49665635	-	49663258	49664674	ENST00000442265.2	novel	0.21	10	38	10	38	y	0.24	10	32	10	32	y	0.15	8	45	8	45	y	0.27	11	30	11	30	y	0.33	16	32	16	32	y	0.37	11	19	11	19	y	0.0353249	3.1383	up	ENSG00000126456.15
5pMXE	novel_NIR_22079	chr21	37072537	37073061	-	37072537	37072991	ENST00000399103.5	novel	0	0	3	0	3	n	0.12	2	15	2	15	n	0	0	14	0	14	n	1	2	0	2	0	y	1	4	0	4	0	y	-	-	-	-	-	-	0.0017316	24	up	ENSG00000185808.13
5pMXE	novel_NIR_25978	chr4	48831258	48832620	+	48831531	48832620	ENST00000508293.5	novel	-	-	-	-	-	-	0	0	9	0	9	n	0.11	2	17	2	17	n	-	-	-	-	-	-	1	3	0	3	0	y	1	2	0	2	0	y	0.0370102	17.1818	up	ENSG00000109180.14
A3SS	known_NIR_288	chr1	149488956	149489561	+	149488956	149518110	ENST00000369227.7	known	0.5	8	8	8	8	y	0.43	12	16	12	16	y	0.47	47	54	47	54	y	0.39	11	17	11	17	y	0.39	17	27	17	27	y	0.37	11	19	11	19	y	0.0433139	-3.90434	down	ENSG00000271383.6
A3SS	known_NIR_645	chr1	161038694	161038880	-	161038673	161038880	ENST00000318289.14	known	0.07	15	206	15	206	y	0.08	31	338	31	338	y	0.09	38	370	38	370	y	0.05	14	252	14	252	y	0.06	16	266	16	266	y	0.06	17	262	17	262	y	0.0356527	-3.5	down	ENSG00000215845.10
A3SS	known_NIR_1205	chr1	29216685	29230731	-	29216812	29230731	ENST00000373791.7	known	0.86	65	11	65	11	y	0.86	96	16	96	16	y	0.88	111	15	111	15	y	0.8	90	22	90	22	y	0.84	91	17	91	17	y	0.79	76	20	76	20	y	0.0487847	-3.4	down	ENSG00000116353.15
A3SS	known_NIR_1951	chr10	78037304	78040204	+	78037304	78040201	ENST00000435275.5	known	0.3	884	2063	884	2063	y	0.28	1050	2763	1050	2763	y	0.29	1382	3367	1382	3367	y	0.26	723	2099	723	2099	y	0.26	706	1996	706	1996	y	0.26	897	2560	897	2560	y	0.0350987	-5.19615	down	ENSG00000138326.18
A3SS	known_NIR_1958	chr10	79724012	79766271	-	79692056	79766271	ENST00000601369.5	known	0.54	19	16	19	16	y	0.38	17	28	17	28	y	0.5	47	47	47	47	y	0.23	14	47	14	47	y	0.23	11	36	11	36	y	0.11	4	33	4	33	y	0.0113986	-4.53052	down	ENSG00000225484.6
A3SS	known_NIR_1961	chr10	80082204	80086231	+	80082204	80090797	ENST00000613758.4	known	0.48	10	11	10	11	y	0.57	13	10	13	10	y	0.66	27	14	27	14	y	0.21	6	23	6	23	y	0.2	7	28	7	28	y	0.36	9	16	9	16	y	0.0129226	-4.27273	down	ENSG00000133678.13
A3SS	known_NIR_2083	chr11	117903451	117903655	-	117902265	117903655	ENST00000528626.5	known	0.11	6	47	6	47	y	0.07	4	51	4	51	y	0.05	3	56	3	56	y	0	0	26	0	26	n	0.03	2	58	2	58	y	0	0	36	0	36	n	0.0426932	-3.28798	down	ENSG00000137747.14
A3SS	known_NIR_2410	chr11	47476959	47477297	-	47476956	47477297	ENST00000395290.6	known	0.53	17	15	17	15	y	0.69	9	4	9	4	y	0.55	23	19	23	19	y	0.2	8	33	8	33	y	0.35	9	17	9	17	y	0.4	10	15	10	15	y	0.0264556	-3.48699	down	ENSG00000149187.17
A3SS	known_NIR_2661	chr11	65536750	65537037	+	65536750	65536986	ENST00000270176.9	known	0.33	122	252	122	252	y	0.34	131	260	131	260	y	0.3	163	384	163	384	y	0.25	80	239	80	239	y	0.24	120	370	120	370	y	0.27	126	336	126	336	y	0.0114824	-4.69574	down	ENSG00000142186.16
A3SS	known_NIR_3035	chr11	88328196	88334937	-	88312554	88334937	ENST00000227266.9	known	0.4	124	185	124	185	y	0.43	139	181	139	181	y	0.38	191	313	191	313	y	0.35	102	191	102	191	y	0.3	102	234	102	234	y	0.34	131	256	131	256	y	0.0254888	-3.47851	down	ENSG00000109861.15
A3SS	known_NIR_3068	chr11	984753	985435	+	984753	985432	ENST00000332231.9	known	0.73	62	23	62	23	y	0.77	49	15	49	15	y	0.8	74	19	74	19	y	0.64	49	28	49	28	y	0.68	52	24	52	24	y	0.69	64	29	64	29	y	0.0217003	-3.80789	down	ENSG00000183020.13
A3SS	known_NIR_3495	chr12	50182037	50192452	-	50182034	50192452	ENST00000552491.5	known	1	25	0	25	0	n	1	24	0	24	0	n	1	27	0	27	0	n	0.89	32	4	32	4	y	0.87	26	4	26	4	y	0.87	40	6	40	6	y	0.0029091	-18.5	down	ENSG00000050405.13
A3SS	known_NIR_3783	chr12	68611043	68624671	+	68611043	68648706	ENST00000341355.9	known	1	2	0	2	0	n	1	4	0	4	0	n	0.59	13	9	13	9	y	-	-	-	-	-	-	0	0	6	0	6	n	0	0	1	0	1	n	0.024155	-6.31707	down	ENSG00000127314.17
A3SS	known_NIR_3950	chr13	21381549	21382920	-	21381546	21382920	ENST00000382466.7	known	0.67	8	4	8	4	y	0.76	16	5	16	5	y	0.72	23	9	23	9	y	0.5	12	12	12	12	y	0.62	8	5	8	5	y	0.53	10	9	10	9	y	0.0236601	-3.74766	down	ENSG00000180776.15
A3SS	known_NIR_3991	chr13	37022317	37024035	-	37022080	37024035	ENST00000360252.8	known	0.34	42	81	42	81	y	0.3	36	85	36	85	y	0.38	78	130	78	130	y	0.21	24	92	24	92	y	0.19	16	70	16	70	y	0.29	38	91	38	91	y	0.0494059	-2.87228	down	ENSG00000102710.19
A3SS	known_NIR_4670	chr14	88596808	88601924	+	88596808	88607243	ENST00000556945.5	known	0.51	80	78	80	78	y	0.51	71	68	71	68	y	0.53	118	106	118	106	y	0.45	70	84	70	84	y	0.45	82	100	82	100	y	0.45	70	84	70	84	y	0.00985246	-10	down	ENSG00000100722.18
A3SS	known_NIR_5278	chr16	15030056	15031735	+	15030056	15138879	ENST00000535621.6	known	0.7	33	14	33	14	y	0.8	33	8	33	8	y	0.78	66	19	66	19	y	0.57	28	21	28	21	y	0.56	35	27	35	27	y	0.54	26	22	26	22	y	0.0158923	-6.39454	down	ENSG00000179889.18
A3SS	known_NIR_5284	chr16	15364932	15365429	-	15364069	15365429	ENST00000360151.8	known	0.34	162	316	162	316	y	0.31	151	329	151	329	y	0.28	184	483	184	483	y	0.21	98	366	98	366	y	0.24	129	415	129	415	y	0.19	99	434	99	434	y	0.0137422	-4.27582	down	ENSG00000183793.13
A3SS	known_NIR_5292	chr16	16348732	16349229	+	16348732	16350092	ENST00000381497.6	known	0.33	162	336	162	336	y	0.31	151	338	151	338	y	0.28	196	514	196	514	y	0.2	98	393	98	393	y	0.23	133	445	133	445	y	0.18	102	463	102	463	y	0.00733936	-5.02886	down	ENSG00000183889.12
A3SS	known_NIR_5424	chr16	28836122	28836751	+	28836122	28836728	ENST00000340394.12	known	0.41	93	134	93	134	y	0.42	112	153	112	153	y	0.39	173	273	173	273	y	0.31	79	177	79	177	y	0.33	92	187	92	187	y	0.35	109	202	109	202	y	0.00743716	-5.27656	down	ENSG00000168488.18
A3SS	known_NIR_5927	chr16	80988596	80997314	-	80976179	80997314	ENST00000565108.5	known	0.21	5	19	5	19	y	0.11	7	59	7	59	y	0.2	14	56	14	56	y	0	0	34	0	34	n	0	0	32	0	32	n	0.07	3	39	3	39	y	0.0222966	-3.80319	down	ENSG00000103121.8
A3SS	known_NIR_6304	chr17	37733743	37739440	-	37733821	37739440	ENST00000617811.4	known	0.44	14	18	14	18	y	0.49	17	18	17	18	y	0.53	37	33	37	33	y	0.3	14	32	14	32	y	0.37	16	27	16	27	y	0.37	11	19	11	19	y	0.0164484	-4.00454	down	ENSG00000275410.4
A3SS	known_NIR_6390	chr17	42190359	42190624	-	42190270	42190624	ENST00000593209.5	known	0.12	12	88	12	88	y	0.12	8	61	8	61	y	0.12	11	83	11	83	y	0.08	6	65	6	65	y	0.06	6	91	6	91	y	0.09	8	85	8	85	y	0.0390123	-4.91354	down	ENSG00000167925.15
A3SS	known_NIR_6498	chr17	47142022	47142229	-	47142025	47142229	ENST00000066544.7	known	0.65	13	7	13	7	y	0.55	6	5	6	5	y	0.6	18	12	18	12	y	0.36	12	21	12	21	y	0.2	2	8	2	8	y	0.44	11	14	11	14	y	0.0479037	-3.49816	down	ENSG00000004897.11
A3SS	known_NIR_6965	chr17	7948619	7949082	+	7948619	7949085	ENST00000563694.5	known	0.48	52	57	52	57	y	0.49	81	83	81	83	y	0.45	86	104	86	104	y	0.37	38	65	38	65	y	0.33	54	112	54	112	y	0.4	78	118	78	118	y	0.0169515	-4.52548	down	ENSG00000170037.13
A3SS	known_NIR_6976	chr17	80429831	80430041	+	80429831	80436133	ENST00000518137.5	known	1	11	0	11	0	n	1	22	0	22	0	n	0.91	20	2	20	2	y	0.52	13	12	13	12	y	0.68	19	9	19	9	y	0.79	23	6	23	6	y	0.0454974	-3.65379	down	ENSG00000173818.16
A3SS	known_NIR_7458	chr19	1432690	1434740	+	1432690	1434737	ENST00000233078.8	known	0.2	157	632	157	632	y	0.2	208	822	208	822	y	0.18	248	1096	248	1096	y	0.17	175	866	175	866	y	0.16	140	738	140	738	y	0.16	177	914	177	914	y	0.0285958	-4.02492	down	ENSG00000071626.16
A3SS	known_NIR_7662	chr19	2324192	2328387	-	2324196	2328387	ENST00000252622.14	known	0.19	404	1738	404	1738	y	0.18	452	2091	452	2091	y	0.18	603	2758	603	2758	y	0.17	372	1784	372	1784	y	0.16	407	2117	407	2117	y	0.17	451	2154	451	2154	y	0.0241101	-3.53553	down	ENSG00000130332.14
A3SS	known_NIR_7768	chr19	35503447	35505718	-	35502886	35505718	ENST00000402589.6	known	0.59	4334	2964	4334	2964	y	0.61	5213	3322	5213	3322	y	0.6	6249	4201	6249	4201	y	0.56	3930	3117	3930	3117	y	0.54	4501	3799	4501	3799	y	0.56	5050	3957	5050	3957	y	0.00647645	-5.2915	down	ENSG00000161249.20
A3SS	known_NIR_7907	chr19	38921596	38922238	-	38921667	38922238	ENST00000221431.10	known	0.05	6	121	6	121	y	0.05	7	144	7	144	y	0.03	6	175	6	175	y	0	0	148	0	148	n	0	0	145	0	145	n	0	0	179	0	179	n	0.0228602	-6.5	down	ENSG00000104835.14
A3SS	known_NIR_8040	chr19	43596585	43597097	+	43596585	43597094	ENST00000391965.6	known	0.29	6	15	6	15	y	0.36	10	18	10	18	y	0.36	8	14	8	14	y	0.06	2	29	2	29	y	0.04	1	22	1	22	n	0.2	5	20	5	20	y	0.0266987	-4.26598	down	ENSG00000124444.15
A3SS	known_NIR_8395	chr19	53449638	53449883	+	53449638	53454650	ENST00000432094.6	known	0.94	16	1	16	1	n	1	4	0	4	0	n	0.94	16	1	16	1	n	0.65	11	6	11	6	y	0.6	6	4	6	4	y	0.56	9	7	9	7	y	0.000570228	-10.8642	down	ENSG00000160336.14
A3SS	known_NIR_8483	chr19	5785275	5785383	-	5784439	5785383	ENST00000586012.1	known	1	181	0	181	0	n	0.99	278	4	278	4	y	0.99	347	4	347	4	y	0.98	240	4	240	4	y	0.97	241	7	241	7	y	0.98	268	5	268	5	y	0.0241101	-3.53553	down	ENSG00000267157.1
A3SS	known_NIR_8646	chr2	106164784	106166056	-	106164799	106166056	ENST00000283148.11	known	0.89	48	6	48	6	y	0.8	37	9	37	9	y	0.83	58	12	58	12	y	0.63	32	19	32	19	y	0.67	43	21	43	21	y	0.72	49	19	49	19	y	0.0109112	-4.49013	down	ENSG00000115652.14
A3SS	known_NIR_8757	chr2	12723552	12724629	+	12723552	12740326	ENST00000155926.8	known	0.88	7	1	7	1	n	0.92	12	1	12	1	n	0.88	15	2	15	2	y	0.57	4	3	4	3	n	0.53	10	9	10	9	y	0.67	6	3	6	3	n	0.012082	-6.93868	down	ENSG00000071575.11
A3SS	known_NIR_8938	chr2	201234112	201266487	+	201234112	201266461	ENST00000264274.13	known	0.26	9	25	9	25	y	0.43	10	13	10	13	y	0.42	10	14	10	14	y	0.05	1	20	1	20	n	0.09	2	21	2	21	y	0.23	7	24	7	24	y	0.0334909	-3.18151	down	ENSG00000064012.21
A3SS	known_NIR_9559	chr20	1164476	1166227	+	1164476	1165029	ENST00000333082.7	known	0.04	40	971	40	971	y	0.04	53	1309	53	1309	y	0.03	48	1656	48	1656	y	0.02	25	1110	25	1110	y	0.02	33	1358	33	1358	y	0.03	39	1509	39	1509	y	0.0474207	-2.82843	down	ENSG00000125818.17
A3SS	known_NIR_9638	chr20	32369123	32371778	+	32369123	32428128	ENST00000613218.4	known	0.7	14	6	14	6	y	0.93	13	1	13	1	n	0.56	9	7	9	7	y	0.2	2	8	2	8	y	0.25	1	3	1	3	n	0.3	3	7	3	7	y	0.0393084	-4.29899	down	ENSG00000171456.16
A3SS	known_NIR_9707	chr20	35735081	35738968	-	35732135	35738968	ENST00000253363.10	known	0.18	46	210	46	210	y	0.24	71	230	71	230	y	0.19	88	374	88	374	y	0.12	34	250	34	250	y	0.1	21	192	21	192	y	0.13	37	242	37	242	y	0.0267708	-4.21776	down	ENSG00000131051.20
A3SS	known_NIR_10189	chr21	5585987	5588137	+	5585987	5590019	ENST00000624627.3	known	0.17	6	30	6	30	y	0.21	3	11	3	11	y	0.23	8	27	8	27	y	0	0	16	0	16	n	0.07	1	13	1	13	n	0.12	2	15	2	15	y	0.0378027	-3.5883	down	ENSG00000274333.4
A3SS	known_NIR_10195	chr21	7462991	7465141	+	7462991	7467023	ENST00000625096.3	known	0.18	6	28	6	28	y	0.23	3	10	3	10	y	0.24	8	26	8	26	y	0	0	15	0	15	n	0.08	1	11	1	11	n	0.12	2	15	2	15	y	0.0322914	-3.76309	down	ENSG00000276077.4
A3SS	known_NIR_10261	chr22	19877212	19878090	-	19877234	19878090	ENST00000400518.5	known	0.09	18	179	18	179	y	0.1	23	218	23	218	y	0.08	23	277	23	277	y	0	0	244	0	244	n	0.04	13	291	13	291	y	0.04	9	243	9	243	y	0.02713	-4.3589	down	ENSG00000184470.19
A3SS	known_NIR_10268	chr22	19895200	19895407	-	19883461	19895407	ENST00000400518.5	known	0.2	22	88	22	88	y	0.26	28	79	28	79	y	0.23	40	132	40	132	y	0.12	19	137	19	137	y	0.11	17	137	17	137	y	0.17	22	104	22	104	y	0.0191408	-3.80789	down	ENSG00000184470.19
A3SS	known_NIR_10766	chr3	133586722	133587162	+	133586722	133587159	ENST00000431519.6	known	0.11	29	227	29	227	y	0.11	41	339	41	339	y	0.13	56	375	56	375	y	0.08	20	233	20	233	y	0.1	25	237	25	237	y	0.07	21	298	21	298	y	0.043162	-3.01511	down	ENSG00000091527.15
A3SS	known_NIR_10801	chr3	136518415	136521213	-	136502779	136521213	ENST00000383202.6	known	1	2	0	2	0	n	1	2	0	2	0	n	0.83	5	1	5	1	n	0.42	5	7	5	7	y	0.5	2	2	2	2	n	0.5	2	2	2	2	n	0.005877	-7.50467	down	ENSG00000118007.12
A3SS	known_NIR_11001	chr3	197019801	197021404	-	197017290	197021404	ENST00000296350.9	known	0.57	98	74	98	74	y	0.58	125	89	125	89	y	0.61	159	100	159	100	y	0.51	104	101	104	101	y	0.53	128	113	128	113	y	0.56	124	97	124	97	y	0.0493566	-2.82843	down	ENSG00000163975.11
A3SS	known_NIR_11044	chr3	3175266	3179621	-	3175269	3179621	ENST00000231948.8	known	0.08	6	72	6	72	y	0.04	3	80	3	80	y	0.05	6	118	6	118	y	0	0	69	0	69	n	0	0	82	0	82	n	0.03	4	116	4	116	y	0.0422506	-2.98481	down	ENSG00000113851.13
A3SS	known_NIR_11236	chr3	50297672	50299213	-	50295619	50299213	ENST00000450982.5	known	1	11	0	11	0	n	0.81	17	4	17	4	y	0.74	14	5	14	5	y	0.43	3	4	3	4	n	0.37	11	19	11	19	y	0.4	8	12	8	12	y	0.0240241	-5.65453	down	ENSG00000186792.15
A3SS	known_NIR_11783	chr4	94455384	94456244	+	94455384	94523724	ENST00000318007.9	known	0.12	14	98	14	98	y	0.1	12	112	12	112	y	0.14	22	137	22	137	y	0.08	9	104	9	104	y	0.05	7	141	7	141	y	0.03	6	176	6	176	y	0.024924	-3.59211	down	ENSG00000163110.14
A3SS	known_NIR_12274	chr5	65554898	65561463	-	65554946	65561463	ENST00000396679.5	known	0.32	9	19	9	19	y	0.29	5	12	5	12	y	0.38	18	29	18	29	y	0.12	5	37	5	37	y	0.12	3	21	3	21	y	0.16	8	41	8	41	y	0.00730589	-6.63802	down	ENSG00000123219.12
A3SS	known_NIR_12876	chr6	41789336	41789568	+	41789336	41789531	ENST00000398884.7	known	0.75	2702	896	2702	896	y	0.74	3191	1121	3191	1121	y	0.74	4426	1530	4426	1530	y	0.69	2493	1111	2493	1111	y	0.71	2928	1171	2928	1171	y	0.7	3182	1362	3182	1362	y	0.0060506	-6.5	down	ENSG00000214736.7
A3SS	known_NIR_13602	chr7	76021992	76028642	-	76005404	76028642	ENST00000360591.7	known	0.93	151	12	151	12	y	0.95	152	8	152	8	y	0.95	247	13	247	13	y	0.88	235	32	235	32	y	0.91	208	21	208	21	y	0.9	238	27	238	27	y	0.0156578	-4.22116	down	ENSG00000127952.16
A3SS	known_NIR_13656	chr7	97871996	97872351	-	97864496	97872351	ENST00000455086.5	known	0.69	11	5	11	5	y	0.78	18	5	18	5	y	0.6	25	17	25	17	y	0.18	2	9	2	9	y	0.43	3	4	3	4	n	0.09	1	10	1	10	n	0.0284335	-3.9984	down	ENSG00000070669.16
A3SS	known_NIR_13941	chr8	22176650	22176924	+	22176650	22176961	ENST00000306385.9	known	0.07	5	66	5	66	y	0.11	8	67	8	67	y	0.07	7	88	7	88	y	0.03	2	76	2	76	y	0.04	3	73	3	73	y	0	0	83	0	83	n	0.0292365	-3.34252	down	ENSG00000168487.17
A3SS	known_NIR_14137	chr8	86474914	86477294	-	86474953	86477294	ENST00000406452.7	known	0.13	41	278	41	278	y	0.17	68	322	68	322	y	0.13	65	453	65	453	y	0.09	35	350	35	350	y	0.06	18	291	18	291	y	0.07	30	373	30	373	y	0.01623	-4.3788	down	ENSG00000176623.11
A3SS	known_NIR_14440	chr9	15510329	15510817	-	15510326	15510817	ENST00000380738.8	known	0.71	10	4	10	4	y	0.6	3	2	3	2	n	0.83	15	3	15	3	y	0.2	3	12	3	12	y	0.36	4	7	4	7	y	0.25	4	12	4	12	y	0.00740575	-5.43877	down	ENSG00000164985.14
A3SS	known_NIR_14702	chrX	134785950	134787472	-	134785947	134787472	ENST00000370790.5	known	0.67	36	18	36	18	y	0.65	54	29	54	29	y	0.66	63	32	63	32	y	0.52	34	31	34	31	y	0.48	36	39	36	39	y	0.53	40	36	40	36	y	0.00501594	-9.18559	down	ENSG00000156504.16
A3SS	known_NIR_14841	chrX	46463308	46471142	+	46463308	46472750	ENST00000344302.8	known	0.67	4	2	4	2	n	0.67	4	2	4	2	n	1	1	0	1	0	n	0.11	1	8	1	8	n	0	0	2	0	2	n	0.46	6	7	6	7	y	0.0313201	-3.3331	down	ENSG00000147121.15
A3SS	known_NIR_14919	chrX	66263688	66266443	+	66263688	66266440	ENST00000519389.5	known	0.55	6	5	6	5	y	0.55	11	9	11	9	y	0.47	9	10	9	10	y	0.22	2	7	2	7	n	0	0	5	0	5	n	0.18	3	14	3	14	y	0.0180134	-5.36269	down	ENSG00000089472.16
A3SS	novel_NIR_1457	chr1	19793648	19798137	-	19787117	19798137	ENST00000294543.10	novel	0.24	4	13	4	13	y	0.33	2	4	2	4	y	0.27	4	11	4	11	n	0	0	11	0	11	n	0	0	14	0	14	n	0	0	18	0	18	n	0.00881074	-10.583	down	ENSG00000162542.13
A3SS	novel_NIR_1942	chr1	229499220	229499684	-	229498306	229499684	ENST00000261396.5	novel	0.27	6	16	6	16	y	0.25	4	12	4	12	y	0.2	5	20	5	20	y	0.11	2	17	2	17	n	0	0	7	0	7	n	0	0	14	0	14	n	0.0149748	-4.82247	down	ENSG00000069248.11
A3SS	novel_NIR_2175	chr1	247302735	247308475	-	247301276	247308475	ENST00000294753.8	novel	0.13	8	54	8	54	n	0.17	10	50	10	50	y	0.07	5	70	5	70	n	0	0	46	0	46	n	0.06	3	50	3	50	n	0	0	57	0	57	n	0.049663	-2.92922	down	ENSG00000162714.12
A3SS	novel_NIR_3009	chr1	63534216	63534644	+	63534216	63545916	ENST00000371088.4	novel	0.4	2	3	2	3	y	0.31	4	9	4	9	y	0.43	6	8	6	8	y	0	0	6	0	6	n	0	0	9	0	9	n	0	0	8	0	8	n	0.00888299	-10.5393	down	ENSG00000203965.12
A3SS	novel_NIR_3127	chr1	76412417	76576846	+	76412417	76627452	ENST00000328299.3	novel	0.6	3	2	3	2	y	0.67	2	1	2	1	y	1	11	0	11	0	y	0.4	4	6	4	6	y	0	0	2	0	2	n	0	0	4	0	4	n	0.0267427	-3.43191	down	ENSG00000184005.10
A3SS	novel_NIR_3798	chr10	132351753	132353038	+	132351753	132355790	ENST00000368614.7	novel	0.56	5	4	5	4	y	0.67	4	2	4	2	y	0.8	8	2	8	2	y	0.22	2	7	2	7	y	0	0	2	0	2	n	0.43	3	4	3	4	y	0.0450777	-3.23477	down	ENSG00000148814.17
A3SS	novel_NIR_5189	chr11	13376728	13378322	+	13376728	13378337	ENST00000389707.8	novel	0.31	4	9	4	9	y	0.33	2	4	2	4	y	0.24	4	13	4	13	y	0	0	19	0	19	n	0	0	19	0	19	n	0	0	18	0	18	n	0.00854117	-10.7509	down	ENSG00000133794.17
A3SS	novel_NIR_5582	chr11	432048	433314	-	432054	433314	ENST00000332826.6	novel	0.25	2	6	2	6	y	0.11	1	8	1	8	n	0.17	2	10	2	10	y	0	0	13	0	13	n	0	0	13	0	13	n	0	0	15	0	15	n	0.0488586	-4.35657	down	ENSG00000185101.12
A3SS	novel_NIR_5931	chr11	64149034	64151239	-	64015281	64151239	ENST00000255681.6	novel	0.29	26	64	26	64	y	0.35	31	58	31	58	y	0.28	32	83	32	83	y	0.18	13	59	13	59	y	0.18	19	84	19	84	y	0.12	12	86	12	86	n	0.00791737	-4.95039	down	ENSG00000133315.10
A3SS	novel_NIR_6390	chr11	71458544	71460722	+	71458544	71463432	ENST00000319023.6	novel	0.23	27	89	27	89	y	0.22	14	49	14	49	y	0.19	16	68	16	68	y	0.06	4	63	4	63	n	0.12	12	85	12	85	n	0.14	10	62	10	62	n	0.0296418	-3.96911	down	ENSG00000172890.11
A3SS	novel_NIR_8297	chr12	65838569	65874005	+	65838569	65915059	ENST00000354636.7	novel	0.64	7	4	7	4	y	0.6	6	4	6	4	y	0.5	6	6	6	6	y	0	0	9	0	9	n	0.11	2	16	2	16	n	0.32	6	13	6	13	y	0.0281529	-4.25244	down	ENSG00000149948.13
A3SS	novel_NIR_9181	chr13	98505053	98519243	-	98475358	98519243	ENST00000397517.6	novel	0.75	6	2	6	2	y	0.67	2	1	2	1	y	1	7	0	7	0	y	0	0	4	0	4	n	0	0	2	0	2	n	-	-	-	-	-	-	0.0148428	-8.11642	down	ENSG00000102572.14
A3SS	novel_NIR_9206	chr14	100305776	100306199	-	100298885	100306199	ENST00000359232.7	novel	0.09	3	31	3	31	n	0.15	6	35	6	35	y	0.14	6	38	6	38	n	0	0	31	0	31	n	0.06	2	33	2	33	n	0	0	54	0	54	n	0.0175877	-3.90942	down	ENSG00000197119.12
A3SS	novel_NIR_9377	chr14	105176991	105177692	-	105177027	105177692	ENST00000392568.6	novel	0.12	22	164	22	164	n	0.11	30	248	30	248	n	0.18	69	316	69	316	y	0	0	228	0	228	n	0	0	196	0	196	n	0.01	3	252	3	252	n	0.0236864	-6.03023	down	ENSG00000183828.14
A3SS	novel_NIR_9574	chr14	23298822	23299401	-	23298917	23299401	ENST00000452015.8	novel	1	6	0	6	0	y	0.67	4	2	4	2	y	0.64	9	5	9	5	y	0.3	3	7	3	7	y	0	0	8	0	8	n	0.1	1	9	1	9	n	0.0136944	-4.3853	down	ENSG00000235194.8
A3SS	novel_NIR_9650	chr14	24150888	24151299	+	24150888	24151131	ENST00000559275.5	novel	0.16	16	83	16	83	y	0.17	11	52	11	52	y	0.16	25	129	25	129	y	0.11	13	104	13	104	n	0.12	13	92	13	92	n	0.14	18	107	18	107	n	0.0326719	-4.24264	down	ENSG00000092098.16
A3SS	novel_NIR_10195	chr14	73860657	73862656	+	73860657	73874023	ENST00000555228.5	novel	0.62	13	8	13	8	y	0.54	7	6	7	6	y	0.33	9	18	9	18	y	0.08	1	11	1	11	n	0.12	2	15	2	15	n	0.28	8	21	8	21	y	0.0389056	-3.17962	down	ENSG00000140043.11
A3SS	novel_NIR_10569	chr15	23566984	23567564	+	23566984	23575346	ENST00000564592.1	novel	1	16	0	16	0	y	1	7	0	7	0	y	0.75	27	9	27	9	y	0.59	13	9	13	9	y	0.69	9	4	9	4	y	0.46	11	13	11	13	y	0.0366449	-3.15625	down	ENSG00000179455.7
A3SS	novel_NIR_11505	chr15	94402019	94402312	+	94402019	94402486	ENST00000557742.1	novel	0.2	2	8	2	8	y	0.25	1	3	1	3	n	-	-	-	-	-	-	0.14	1	6	1	6	n	0	0	2	0	2	n	0	0	1	0	1	n	0.04705	-3.36851	down	ENSG00000140563.14
A3SS	novel_NIR_11730	chr16	17117488	17117646	-	17109017	17117646	ENST00000261381.6	novel	1	1	0	1	0	n	1	5	0	5	0	y	1	4	0	4	0	y	0	0	1	0	1	n	0	0	2	0	2	n	0.25	1	3	1	3	n	0.0081634	-11	down	ENSG00000103489.11
A3SS	novel_NIR_11902	chr16	21852046	21857259	-	21847541	21857259	ENST00000415645.6	novel	0.33	1	2	1	2	n	0.36	4	7	4	7	y	0.5	3	3	3	3	y	0.25	4	12	4	12	y	0.23	3	10	3	10	y	0.14	1	6	1	6	n	0.0468206	-3.04678	down	ENSG00000185864.16
A3SS	novel_NIR_11934	chr16	22513921	22519138	+	22513921	22523820	ENST00000451409.5	novel	0.33	1	2	1	2	n	0.25	4	12	4	12	n	0.33	3	6	3	6	y	0.16	4	21	4	21	y	0.04	1	25	1	25	n	0	0	13	0	13	n	0.0212355	-4.30501	down	ENSG00000243716.10
A3SS	novel_NIR_12227	chr16	30240242	30245454	-	30235579	30245454	ENST00000520915.5	novel	0.33	1	2	1	2	n	0.33	6	12	6	12	n	0.33	3	6	3	6	y	0.17	4	19	4	19	y	0	0	26	0	26	n	0.07	1	13	1	13	n	0.0367978	-5.06803	down	ENSG00000198064.13
A3SS	novel_NIR_12786	chr16	67395280	67395484	-	67395221	67395484	ENST00000348579.6	novel	1	8	0	8	0	y	0.86	12	2	12	2	y	0.95	35	2	35	2	y	0.78	7	2	7	2	y	0.75	15	5	15	5	y	0.82	9	2	9	2	y	0.0455882	-3.35489	down	ENSG00000159714.10
A3SS	novel_NIR_13380	chr16	89955266	89957473	+	89955266	89957541	ENST00000570182.5	novel	1	4	0	4	0	y	0.55	11	9	11	9	y	1	7	0	7	0	y	0.32	7	15	7	15	y	0.11	2	16	2	16	n	0.22	6	21	6	21	y	0.0373089	-3.91441	down	ENSG00000140995.16
A3SS	novel_NIR_13533	chr17	17078076	17096768	+	17078076	17126702	ENST00000395811.9	novel	0.28	19	49	19	49	y	0.3	16	37	16	37	y	0.37	29	49	29	49	y	0.2	13	51	13	51	y	0.13	9	62	9	62	n	0.19	10	43	10	43	y	0.016324	-4.09989	down	ENSG00000133030.19
A3SS	novel_NIR_13942	chr17	38851245	38852604	-	38848057	38852604	ENST00000394333.5	novel	0.14	2	12	2	12	n	0.14	1	6	1	6	n	0.15	3	17	3	17	y	0	0	19	0	19	n	0	0	7	0	7	n	-	-	-	-	-	-	0.000540395	-43	down	ENSG00000125691.12
A3SS	novel_NIR_14904	chr17	74230999	74231342	+	74230999	74237294	ENST00000269346.8	novel	0.33	2	4	2	4	y	0.25	1	3	1	3	n	0.29	2	5	2	5	y	0	0	11	0	11	n	0	0	7	0	7	n	0	0	15	0	15	n	0.00628196	-12.5574	down	ENSG00000141540.10
A3SS	novel_NIR_15193	chr17	78404089	78414952	+	78404089	78414879	ENST00000262764.10	novel	0.18	5	23	5	23	y	0.32	14	30	14	30	y	0.32	17	36	17	36	y	0.04	2	45	2	45	n	0.15	5	28	5	28	y	0.07	3	37	3	37	n	0.0360159	-3.27155	down	ENSG00000087157.18
A3SS	novel_NIR_15264	chr17	80105894	80106078	+	80105894	80107557	ENST00000390015.7	novel	0.16	4	21	4	21	y	0.21	6	23	6	23	y	0.18	9	40	9	40	y	0.07	2	25	2	25	n	0.13	4	26	4	26	n	0.08	4	46	4	46	n	0.0208448	-3.81838	down	ENSG00000171298.12
A3SS	novel_NIR_15573	chr18	23784157	23796023	+	23784157	23810366	ENST00000313654.13	novel	0.92	22	2	22	2	y	0.89	41	5	41	5	y	0.94	44	3	44	3	y	0.78	28	8	28	8	y	0.79	27	7	27	7	y	0.72	28	11	28	11	y	0.00653731	-5.84201	down	ENSG00000053747.15
A3SS	novel_NIR_15962	chr19	10544325	10544709	+	10544325	10544783	ENST00000309469.8	novel	0.38	15	25	15	25	y	0.27	25	66	25	66	y	0.36	36	64	36	64	y	0.19	13	56	13	56	y	0.25	22	65	22	65	y	0.11	10	78	10	78	n	0.0456793	-2.90349	down	ENSG00000130734.9
A3SS	novel_NIR_16126	chr19	13766129	13768359	+	13766129	13768561	ENST00000040663.7	novel	0.21	4	15	4	15	y	0.11	2	16	2	16	n	0.17	7	33	7	33	y	0	0	20	0	20	n	0	0	14	0	14	n	0	0	21	0	21	n	0.0302257	-5.62069	down	ENSG00000037757.13
A3SS	novel_NIR_16466	chr19	2233397	2233998	-	2230612	2233998	ENST00000587394.6	novel	0.3	3	7	3	7	y	0.33	4	8	4	8	y	0.53	26	23	26	23	y	0	0	17	0	17	n	0.08	1	11	1	11	n	0	0	5	0	5	n	0.0265464	-4.678	down	ENSG00000104886.9
A3SS	novel_NIR_16656	chr19	35503408	35505718	-	35502183	35505718	ENST00000480502.5	novel	0.23	34	112	34	112	y	0.41	66	94	66	94	y	0.3	73	171	73	171	y	0	0	110	0	110	n	0	0	125	0	125	n	0	0	131	0	131	n	0.0268338	-5.98108	down	ENSG00000161249.20
A3SS	novel_NIR_17860	chr19	52917931	52923369	-	52917997	52923369	ENST00000596623.1	novel	1	4	0	4	0	y	-	-	-	-	-	-	1	2	0	2	0	y	0.33	1	2	1	2	n	0	0	2	0	2	n	0	0	1	0	1	n	0.0149345	-8.09091	down	ENSG00000213793.4
A3SS	novel_NIR_18976	chr2	169697531	169697893	+	169697531	169700946	ENST00000616524.4	novel	0.57	8	6	8	6	y	0.44	4	5	4	5	y	0.36	4	7	4	7	y	0	0	7	0	7	n	0	0	3	0	3	n	0.12	2	14	2	14	n	0.00727552	-5.69951	down	ENSG00000144362.11
A3SS	novel_NIR_19249	chr2	200987532	200988262	-	200981871	200988262	ENST00000418596.7	novel	0.5	4	4	4	4	y	0.4	4	6	4	6	y	0.5	2	2	2	2	y	0	0	4	0	4	n	0	0	1	0	1	n	0	0	2	0	2	n	0.00506332	-14	down	ENSG00000155744.9
A3SS	novel_NIR_19546	chr2	227347384	227350936	+	227347384	227355677	ENST00000392059.5	novel	0.2	12	48	12	48	y	0.25	7	21	7	21	y	0.17	10	50	10	50	y	0.08	3	34	3	34	n	0.15	6	33	6	33	y	0.04	2	49	2	49	n	0.0476052	-2.93713	down	ENSG00000168958.19
A3SS	novel_NIR_19994	chr2	27661155	27662179	-	27657669	27662179	ENST00000404798.6	novel	1	6	0	6	0	y	-	-	-	-	-	-	1	7	0	7	0	y	0.5	2	2	2	2	y	0.14	1	6	1	6	n	0.55	6	5	6	5	y	0.0428906	-4.67184	down	ENSG00000119760.15
A3SS	novel_NIR_20341	chr2	62771392	62790719	+	62771392	62826087	ENST00000405015.7	novel	1	4	0	4	0	y	0.7	7	3	7	3	y	1	2	0	2	0	y	0.29	2	5	2	5	y	0	0	4	0	4	n	0	0	1	0	1	n	0.00447767	-5.77587	down	ENSG00000115504.14
A3SS	novel_NIR_21172	chr20	35277932	35279566	-	35272145	35279566	ENST00000444717.1	novel	1	2	0	2	0	y	1	4	0	4	0	y	1	2	0	2	0	y	0	0	2	0	2	n	0	0	8	0	8	n	0.4	2	3	2	3	y	0.0228602	-6.5	down	ENSG00000261582.1
A3SS	novel_NIR_21173	chr20	35279346	35279566	-	35272145	35279566	ENST00000444717.1	novel	1	8	0	8	0	y	1	16	0	16	0	y	1	24	0	24	0	y	0.78	7	2	7	2	y	0.65	15	8	15	8	y	0.81	13	3	13	3	y	0.0355765	-5.15922	down	ENSG00000261582.1
A3SS	novel_NIR_21276	chr20	36545068	36548127	+	36545068	36549077	ENST00000346786.2	novel	0.37	120	205	120	205	y	0.33	115	237	115	237	y	0.33	173	347	173	347	y	0.28	106	272	106	272	y	0.3	131	310	131	310	y	0.29	112	270	112	270	y	0.0410356	-3.67065	down	ENSG00000101335.9
A3SS	novel_NIR_21606	chr20	5092387	5106188	-	5069349	5106188	ENST00000615008.4	novel	1	4	0	4	0	y	0.83	10	2	10	2	y	1	14	0	14	0	y	0.64	7	4	7	4	y	0.8	8	2	8	2	y	0.75	6	2	6	2	y	0.0462384	-2.89123	down	ENSG00000089063.14
A3SS	novel_NIR_23629	chr3	12840889	12841494	-	12840353	12841494	ENST00000435983.5	novel	0.67	2	1	2	1	n	-	-	-	-	-	-	0.61	11	7	11	7	y	0	0	12	0	12	n	0	0	6	0	6	n	0.3	6	14	6	14	y	0.0252296	-5.17226	down	ENSG00000144713.12
A3SS	novel_NIR_23814	chr3	142564626	142566121	-	142563109	142566121	ENST00000350721.8	novel	-	-	-	-	-	-	1	2	0	2	0	y	1	3	0	3	0	y	0.43	3	4	3	4	y	-	-	-	-	-	-	0.5	2	2	2	2	y	0.0415888	-15.2857	down	ENSG00000175054.14
A3SS	novel_NIR_24433	chr3	39100454	39100747	-	39100503	39100747	ENST00000319283.7	novel	0.26	5	14	5	14	y	0.32	10	21	10	21	y	0.16	9	48	9	48	y	0	0	26	0	26	n	0.11	4	33	4	33	n	0.05	2	35	2	35	n	0.0324953	-3.42363	down	ENSG00000114745.13
A3SS	novel_NIR_25093	chr3	81655001	81670838	-	81649921	81670838	ENST00000429644.6	novel	0.12	2	15	2	15	n	0.18	2	9	2	9	y	0.14	4	25	4	25	n	0	0	15	0	15	n	0	0	14	0	14	n	0	0	19	0	19	n	0.0141564	-8.31522	down	ENSG00000114480.12
A3SS	novel_NIR_26278	chr4	866501	866956	-	866534	866956	ENST00000314167.8	novel	0.51	39	37	39	37	y	0.5	51	51	51	51	y	0.45	62	76	62	76	y	0.35	49	91	49	91	y	0.39	56	87	56	87	y	0.31	43	95	43	95	y	0.0110542	-4.61286	down	ENSG00000178950.16
A3SS	novel_NIR_27021	chr5	173609670	173613131	-	173608292	173613131	ENST00000285908.5	novel	0.64	28	16	28	16	y	0.8	8	2	8	2	y	0.67	26	13	26	13	y	0.59	17	12	17	12	y	0.5	6	6	6	6	y	0.4	8	12	8	12	y	0.0491626	-2.80661	down	ENSG00000145919.10
A3SS	novel_NIR_27150	chr5	178861080	178866041	+	178861080	178866244	ENST00000322434.7	novel	1	4	0	4	0	y	0.44	4	5	4	5	y	0.67	4	2	4	2	y	0	0	4	0	4	n	-	-	-	-	-	-	0	0	5	0	5	n	0.0494628	-4.32781	down	ENSG00000178338.10
A3SS	novel_NIR_30350	chr7	32558628	32559223	+	32558628	32558929	ENST00000318709.8	novel	0.44	7	9	7	9	y	0.22	2	7	2	7	y	0.24	9	28	9	28	y	0	0	17	0	17	n	0	0	24	0	24	n	0.05	1	21	1	21	n	0.049674	-3.92494	down	ENSG00000105778.17
A3SS	novel_NIR_31227	chr8	118375856	118379560	-	118197732	118379560	ENST00000409003.4	novel	1	7	0	7	0	y	0.9	18	2	18	2	y	0.84	16	3	16	3	y	0.4	4	6	4	6	y	0.62	5	3	5	3	y	0.47	7	8	7	8	y	0.00838462	-5.21286	down	ENSG00000177570.13
A3SS	novel_NIR_31270	chr8	123077257	123077375	+	123077257	123082702	ENST00000287380.5	novel	0.94	16	1	16	1	y	1	5	0	5	0	y	0.75	9	3	9	3	y	0.36	5	9	5	9	y	0.45	5	6	5	6	y	0.44	7	9	7	9	y	0.0145951	-5.95876	down	ENSG00000156787.16
A3SS	novel_NIR_31960	chr8	37766355	37766482	+	37766355	37772755	ENST00000328195.7	novel	0.16	6	31	6	31	y	0.17	7	34	7	34	y	0.15	10	55	10	55	y	0.08	4	47	4	47	n	0	0	30	0	30	n	0	0	23	0	23	n	0.0328642	-4.88678	down	ENSG00000147471.11
A3SS	novel_NIR_31983	chr8	38820635	38823990	+	38820635	38825308	ENST00000520615.5	novel	0.3	3	7	3	7	y	0.45	9	11	9	11	n	0.25	5	15	5	15	n	0.08	1	11	1	11	n	0	0	4	0	4	n	0	0	5	0	5	n	0.0223496	-4.66459	down	ENSG00000147526.19
A3SS	novel_NIR_32326	chr8	94739790	94744485	+	94739790	94756036	ENST00000414645.6	novel	0.67	10	5	10	5	y	1	10	0	10	0	y	0.7	16	7	16	7	y	0.29	4	10	4	10	y	0.36	5	9	5	9	y	0.5	4	4	4	4	y	0.040111	-3.3303	down	ENSG00000156162.16
A3SS	novel_NIR_32814	chr9	129489299	129493416	+	129489299	129503323	ENST00000419300.3	novel	0.15	2	11	2	11	y	0.2	3	12	3	12	y	0.17	3	15	3	15	y	0	0	2	0	2	n	0	0	2	0	2	n	0	0	8	0	8	n	0.00695342	-11.9296	down	ENSG00000204054.11
A3SS	novel_NIR_33045	chr9	137800984	137802347	+	137800984	137802409	ENST00000493484.5	novel	0.57	4	3	4	3	y	-	-	-	-	-	-	0.43	3	4	3	4	y	0	0	10	0	10	n	0.25	2	6	2	6	y	0	0	2	0	2	n	0.033013	-3.82852	down	ENSG00000181090.17
A3SS	novel_NIR_33726	chr9	98199536	98200253	-	98199584	98200253	ENST00000375064.5	novel	0.4	2	3	2	3	y	0.43	3	4	3	4	y	0.53	8	7	8	7	y	0.25	2	6	2	6	y	0	0	5	0	5	n	0	0	7	0	7	n	0.0305368	-4.01584	down	ENSG00000095383.19
A3SS	known_NIR_89	chr1	112705123	112707078	-	112705168	112707078	ENST00000339083.11	known	0.13	14	95	14	95	y	0.12	19	137	19	137	y	0.1	25	218	25	218	y	0.2	34	135	34	135	y	0.2	43	172	43	172	y	0.17	36	177	36	177	y	0.00557388	5.5	up	ENSG00000155366.16
A3SS	known_NIR_194	chr1	145384479	145385194	-	145292489	145385194	ENST00000620821.1	known	0.11	38	296	38	296	y	0.11	19	150	19	150	y	0.12	28	206	28	206	y	0.14	44	272	44	272	y	0.18	52	234	52	234	y	0.17	52	247	52	247	y	0.044741	4.00892	up	ENSG00000162825.16
A3SS	known_NIR_2217	chr11	1996421	1996518	-	1996417	1996518	ENST00000439725.5	known	0.97	2591	79	2591	79	y	0.97	3222	87	3222	87	y	0.98	4343	85	4343	85	y	0.99	2706	40	2706	40	y	0.98	2835	62	2835	62	y	0.99	2949	44	2949	44	y	0.0474207	2.82843	up	ENSG00000130600.15
A3SS	known_NIR_3194	chr12	117158084	117165485	-	117158063	117165485	ENST00000622495.4	known	0	0	8	0	8	n	0	0	6	0	6	n	0	0	7	0	7	n	0.22	2	7	2	7	n	0.3	6	14	6	14	y	0.13	2	13	2	13	y	0.0477149	4.41249	up	ENSG00000135108.14
A3SS	known_NIR_3287	chr12	122981299	122981595	+	122981299	122981571	ENST00000315580.9	known	0.66	156	79	156	79	y	0.65	226	122	226	122	y	0.7	323	136	323	136	y	0.73	190	71	190	71	y	0.74	269	93	269	93	y	0.74	252	88	252	88	y	0.04322	4.26401	up	ENSG00000182196.13
A3SS	known_NIR_3328	chr12	132690376	132695884	+	132690376	132704619	ENST00000543589.5	known	0.92	238	20	238	20	y	0.91	275	28	275	28	y	0.91	404	39	404	39	y	0.95	272	14	272	14	y	0.95	301	16	301	16	y	0.93	344	24	344	24	y	0.0285958	4.02492	up	ENSG00000176894.9
A3SS	known_NIR_3749	chr12	6602154	6602376	-	6602175	6602376	ENST00000544484.5	known	0.25	5	15	5	15	y	0	0	4	0	4	n	0.27	3	8	3	8	y	0.5	2	2	2	2	n	0.67	8	4	8	4	y	0.45	9	11	9	11	y	0.0315399	3.3503	up	ENSG00000111642.14
A3SS	known_NIR_4127	chr14	103467191	103468081	+	103467191	103468033	ENST00000440884.7	known	0.4	57	84	57	84	y	0.24	17	53	17	53	y	0.32	45	94	45	94	y	0.54	75	63	75	63	y	0.47	33	37	33	37	y	0.47	47	53	47	53	y	0.0449925	3.34961	up	ENSG00000075413.17
A3SS	known_NIR_4563	chr14	70373131	70375676	-	70342729	70375676	ENST00000621525.4	known	0.9	178	20	178	20	y	0.93	243	19	243	19	y	0.91	308	31	308	31	y	0.95	192	11	192	11	y	0.95	249	13	249	13	y	0.94	248	17	248	17	y	0.0493723	3.53553	up	ENSG00000258644.5
A3SS	known_NIR_5239	chr16	12665020	12781185	-	12665115	12781185	ENST00000433677.6	known	0	0	31	0	31	n	0	0	18	0	18	n	0	0	34	0	34	n	0.43	16	21	16	21	y	0.36	9	16	9	16	y	0.67	16	8	16	8	y	0.035247	5.18461	up	ENSG00000103381.11
A3SS	known_NIR_5332	chr16	1978220	1978315	+	1978220	1978313	ENST00000568546.5	known	0.02	5	321	5	321	y	0.02	11	464	11	464	y	0.02	11	577	11	577	y	0.04	17	464	17	464	y	0.03	12	455	12	455	y	0.04	20	482	20	482	y	0.0377496	5	up	ENSG00000183751.14
A3SS	known_NIR_5801	chr16	67657814	67657986	-	67657853	67657986	ENST00000620761.4	known	0	0	149	0	149	n	0	0	251	0	251	n	0.01	4	288	4	288	y	0.02	5	206	5	206	y	0.01	3	262	3	262	y	0.02	6	274	6	274	y	0.0474207	2.82843	up	ENSG00000102977.13
A3SS	known_NIR_5878	chr16	71923380	71924773	+	71923380	71924769	ENST00000544564.5	known	0.02	5	206	5	206	y	0.01	3	214	3	214	y	0.01	3	332	3	332	y	0.04	9	215	9	215	y	0.05	12	250	12	250	y	0.07	16	210	16	210	y	0.0326719	4.24264	up	ENSG00000182149.20
A3SS	known_NIR_6049	chr16	89955266	89957541	+	89955266	89957511	ENST00000563594.5	known	0	0	330	0	330	n	0.02	9	530	9	530	y	0	0	645	0	645	n	0.04	15	407	15	407	y	0.03	16	538	16	538	y	0.04	21	518	21	518	y	0.0285958	4.02492	up	ENSG00000140995.16
A3SS	known_NIR_6499	chr17	47151936	47154672	-	47151918	47154672	ENST00000066544.7	known	0	0	25	0	25	n	0	0	14	0	14	n	0.03	1	28	1	28	n	0.09	2	21	2	21	y	0.1	3	26	3	26	y	0.04	1	24	1	24	n	0.0491782	3.16228	up	ENSG00000004897.11
A3SS	known_NIR_6529	chr17	49225131	49226647	-	49225004	49226647	ENST00000310544.8	known	0	0	3	0	3	n	0	0	2	0	2	n	0.14	2	12	2	12	y	-	-	-	-	-	-	0.5	4	4	4	4	n	0.53	8	7	8	7	y	0.00591164	9.55429	up	ENSG00000173868.11
A3SS	known_NIR_6715	chr17	7017014	7017261	+	7017014	7017257	ENST00000547302.2	known	0.66	365	186	365	186	y	0.67	500	242	500	242	y	0.66	626	317	626	317	y	0.71	450	182	450	182	y	0.7	478	204	478	204	y	0.7	533	226	533	226	y	0.00105756	8.48528	up	ENSG00000161939.18
A3SS	known_NIR_8244	chr19	49453421	49458486	+	49453421	49460822	ENST00000540132.5	known	0.92	124	11	124	11	y	0.95	115	6	115	6	y	0.93	171	12	171	12	y	0.97	125	4	125	4	y	1	160	0	160	0	n	0.97	119	4	119	4	y	0.0255316	3.5	up	ENSG00000161618.9
A3SS	known_NIR_8456	chr19	55692796	55692954	+	55692796	55692951	ENST00000270460.10	known	0.39	290	446	290	446	y	0.38	347	572	347	572	y	0.38	456	751	456	751	y	0.41	375	535	375	535	y	0.42	467	636	467	636	y	0.42	430	605	430	605	y	0.00211065	7.07107	up	ENSG00000063245.14
A3SS	known_NIR_8643	chr2	105855289	105881328	+	105855289	105892982	ENST00000451463.6	known	0.62	56	35	56	35	y	0.61	59	37	59	37	y	0.67	84	41	84	41	y	0.68	47	22	47	22	y	0.71	51	21	51	21	y	0.73	56	21	56	21	y	0.0386516	3.11127	up	ENSG00000071051.13
A3SS	known_NIR_8958	chr2	202552888	202555252	+	202552888	202559696	ENST00000374574.2	known	0.74	23	8	23	8	y	0.65	15	8	15	8	y	0.67	22	11	22	11	y	0.91	43	4	43	4	y	0.9	43	5	43	5	y	0.88	37	5	37	5	y	0.01056	7.3236	up	ENSG00000204217.12
A3SS	known_NIR_9461	chr2	73946906	73950585	+	73946906	73958146	ENST00000348222.3	known	0.45	210	255	210	255	y	0.43	206	276	206	276	y	0.45	318	381	318	381	y	0.56	280	216	280	216	y	0.54	290	249	290	249	y	0.58	321	233	321	233	y	0.00243638	8.75	up	ENSG00000114956.19
A3SS	known_NIR_9569	chr20	13788652	13793160	+	13788652	13793180	ENST00000378106.9	known	0.11	14	110	14	110	y	0.11	10	82	10	82	y	0.15	27	155	27	155	y	0.17	15	74	15	74	y	0.19	16	70	16	70	y	0.17	26	130	26	130	y	0.038561	3.57771	up	ENSG00000101247.17
A3SS	known_NIR_10096	chr21	34073745	34094863	+	34073745	34125341	ENST00000399312.2	known	0	1	282	1	282	n	0	1	345	1	345	n	0.01	7	510	7	510	y	0.01	3	334	3	334	y	0.02	8	365	8	365	y	0.02	8	380	8	380	y	0.0474207	2.82843	up	ENSG00000243927.5
A3SS	known_NIR_10525	chr22	42070373	42070763	-	42070366	42070763	ENST00000403363.5	known	0.5	3	3	3	3	n	0.45	5	6	5	6	y	0.38	3	5	3	5	n	1	5	0	5	0	n	0.86	12	2	12	2	y	0.78	7	2	7	2	n	0.00871605	5.97309	up	ENSG00000198951.11
A3SS	known_NIR_10588	chr22	50522415	50522498	+	50522415	50522501	ENST00000420993.6	known	0.12	48	361	48	361	y	0.13	58	387	58	387	y	0.15	107	595	107	595	y	0.17	72	352	72	352	y	0.17	93	457	93	457	y	0.21	113	427	113	427	y	0.0428328	3.12772	up	ENSG00000025770.18
A3SS	known_NIR_10718	chr3	12840353	12841494	-	12840341	12841494	ENST00000396957.5	known	0.05	1	20	1	20	n	0	0	37	0	37	n	0.12	7	51	7	51	y	0.27	12	33	12	33	y	0.13	6	41	6	41	y	0.23	14	47	14	47	y	0.0492826	2.82576	up	ENSG00000144713.12
A3SS	known_NIR_10783	chr3	13483564	13496736	+	13483564	13502884	ENST00000404040.5	known	0.77	27	8	27	8	y	0.78	32	9	32	9	y	0.74	39	14	39	14	y	1	28	0	28	0	n	1	33	0	33	0	n	1	21	0	21	0	n	0.00256892	19.6919	up	ENSG00000163517.14
A3SS	known_NIR_10872	chr3	157157083	157158866	-	157153156	157158866	ENST00000461804.5	known	0.12	3	21	3	21	y	0.11	2	16	2	16	y	0.13	6	39	6	39	y	0.35	6	11	6	11	y	0.27	3	8	3	8	y	0.45	10	12	10	12	y	0.0436429	4.51762	up	ENSG00000163660.11
A3SS	known_NIR_10967	chr3	185931852	185937825	-	185926734	185937825	ENST00000453386.6	known	0.03	9	279	9	279	y	0.02	5	254	5	254	y	0.03	15	533	15	533	y	0.05	17	348	17	348	y	0.05	16	339	16	339	y	0.04	14	353	14	353	y	0.0132356	4.24264	up	ENSG00000136527.17
A3SS	known_NIR_11493	chr4	129038126	129039041	-	129003876	129039041	ENST00000281142.9	known	0.53	8	7	8	7	y	0.75	6	2	6	2	n	0.73	11	4	11	4	y	1	5	0	5	0	n	0.82	9	2	9	2	y	1	2	0	2	0	n	0.0444124	2.92284	up	ENSG00000151466.11
A3SS	known_NIR_11553	chr4	168390530	168391540	-	168384812	168391540	ENST00000260184.11	known	0	0	4	0	4	n	0	0	1	0	1	n	0	0	4	0	4	n	0.3	3	7	3	7	y	0.22	2	7	2	7	n	0.33	2	4	2	4	n	0.0131611	8.63044	up	ENSG00000181381.13
A3SS	known_NIR_11720	chr4	730668	730952	+	730668	730970	ENST00000362003.9	known	0	0	34	0	34	n	0	0	29	0	29	n	0	0	65	0	65	n	0.04	2	54	2	54	y	0.03	1	39	1	39	n	0.04	2	48	2	48	y	0.0081634	11	up	ENSG00000185619.17
A3SS	known_NIR_12127	chr5	177022913	177023160	+	177022913	177062058	ENST00000512315.5	known	0	0	1	0	1	n	-	-	-	-	-	-	0	0	4	0	4	n	1	1	0	1	0	n	0.64	9	5	9	5	y	0.75	3	1	3	1	n	0.0174089	7.47971	up	ENSG00000113761.11
A3SS	known_NIR_12649	chr6	3000085	3002050	+	3000085	3004495	ENST00000380441.5	known	0.56	10	8	10	8	y	0.36	4	7	4	7	y	0.45	15	18	15	18	y	0.75	12	4	12	4	y	0.92	11	1	11	1	n	0.71	10	4	10	4	y	0.0180692	3.89037	up	ENSG00000124588.19
A3SS	known_NIR_12791	chr6	33289628	33289770	+	33289628	33289775	ENST00000374610.6	known	0.78	160	44	160	44	y	0.77	156	47	156	47	y	0.76	244	78	244	78	y	0.81	140	33	140	33	y	0.8	140	36	140	36	y	0.8	225	55	225	55	y	0.0131721	5	up	ENSG00000204220.9
A3SS	known_NIR_13571	chr7	72954479	72954625	-	72950196	72954625	ENST00000602348.5	known	0.2	6	24	6	24	y	0.22	6	21	6	21	y	0.03	1	37	1	37	n	0.45	17	21	17	21	y	0.38	8	13	8	13	y	0.37	11	19	11	19	y	0.0383131	3.82733	up	ENSG00000106133.17
A3SS	known_NIR_13582	chr7	73738463	73738646	-	73738442	73738646	ENST00000437775.6	known	0.95	124	6	124	6	y	0.9	141	16	141	16	y	0.94	186	12	186	12	y	1	154	0	154	0	n	0.98	168	3	168	3	y	1	216	0	216	0	n	0.03755	3.8	up	ENSG00000106077.18
A3SS	known_NIR_14128	chr8	85209409	85212157	+	85209409	85212160	ENST00000418930.6	known	0.42	38	53	38	53	y	0.41	45	64	45	64	y	0.46	72	86	72	86	y	0.63	93	55	93	55	y	0.65	81	43	81	43	y	0.54	58	50	58	50	y	0.020831	4.75954	up	ENSG00000133740.10
A3SS	known_NIR_14620	chr9	98199584	98200253	-	98199588	98200253	ENST00000465784.6	known	0.05	3	62	3	62	y	0.04	4	107	4	107	y	0.06	7	105	7	105	y	0.08	6	68	6	68	y	0.08	5	60	5	60	y	0.09	7	75	7	75	y	0.0131721	5	up	ENSG00000095383.19
A3SS	known_NIR_14647	chrX	103608673	103609038	+	103608673	103609043	ENST00000372628.5	known	0.87	68	10	68	10	y	0.85	46	8	46	8	y	0.87	117	17	117	17	y	0.94	96	6	96	6	y	0.97	78	2	78	2	y	1	74	0	74	0	n	0.0156158	5.74737	up	ENSG00000196507.10
A3SS	known_NIR_14773	chrX	154556376	154558535	+	154556376	154558532	ENST00000618670.4	known	0.07	5	65	5	65	y	0.02	1	61	1	61	n	0.03	3	98	3	98	y	0.12	11	79	11	79	y	0.15	9	53	9	53	y	0.08	7	80	7	80	y	0.0430525	3.02005	up	ENSG00000269335.5
A3SS	novel_NIR_994	chr1	15758848	15764493	+	15758848	15764496	ENST00000375766.7	novel	0	0	18	0	18	n	0.05	2	40	2	40	n	0	0	33	0	33	n	0.16	6	32	6	32	y	0.23	6	20	6	20	y	0.11	4	32	4	32	n	0.0326284	3.88741	up	ENSG00000162458.12
A3SS	novel_NIR_1676	chr1	211663628	211667106	-	211658712	211667106	ENST00000540251.5	novel	0.91	43	4	43	4	y	0.9	37	4	37	4	y	0.93	99	7	99	7	y	1	36	0	36	0	y	0.96	43	2	43	2	y	0.96	44	2	44	2	y	0.02565	3.75326	up	ENSG00000117650.12
A3SS	novel_NIR_2176	chr1	247308027	247308475	-	247301276	247308475	ENST00000294753.8	novel	0.16	10	54	10	54	y	0.07	4	50	4	50	n	0.16	13	70	13	70	y	0.27	17	46	17	46	y	0.28	19	50	19	50	y	0.25	19	57	19	57	y	0.0362045	4.37061	up	ENSG00000162714.12
A3SS	novel_NIR_3062	chr1	67685538	67686441	+	67685538	67686350	ENST00000370985.3	novel	-	-	-	-	-	-	0	0	1	0	1	n	0	0	3	0	3	n	0.18	2	9	2	9	y	0.17	1	5	1	5	n	-	-	-	-	-	-	0.0181842	35	up	ENSG00000116717.11
A3SS	novel_NIR_3174	chr1	8015400	8015495	-	8014396	8015495	ENST00000469499.5	novel	0.28	5	13	5	13	y	0.22	2	7	2	7	y	0.25	1	3	1	3	n	1	4	0	4	0	y	1	5	0	5	0	y	0.83	10	2	10	2	y	0.00375961	11.7009	up	ENSG00000116285.12
A3SS	novel_NIR_3586	chr10	116901679	116901765	-	116900540	116901765	ENST00000392903.3	novel	0	0	4	0	4	n	0	0	8	0	8	n	0.33	2	4	2	4	y	1	5	0	5	0	y	-	-	-	-	-	-	1	1	0	1	0	n	0.0149345	8.09091	up	ENSG00000187164.17
A3SS	novel_NIR_3897	chr10	17172949	17174551	-	17168917	17174551	ENST00000377799.7	novel	0.25	2	6	2	6	y	0.4	8	12	8	12	y	0.19	5	21	5	21	y	0.46	6	7	6	7	y	0.5	5	5	5	5	y	0.57	4	3	4	3	y	0.0468326	3.2746	up	ENSG00000107614.21
A3SS	novel_NIR_4182	chr10	48306821	48325897	+	48306821	48401612	ENST00000395611.7	novel	0	0	4	0	4	n	-	-	-	-	-	-	0	0	6	0	6	n	0.57	4	3	4	3	n	1	4	0	4	0	y	1	4	0	4	0	n	0.0268711	5.97674	up	ENSG00000107643.15
A3SS	novel_NIR_4400	chr10	73504272	73505278	+	73504272	73504805	ENST00000442133.8	novel	0	0	3	0	3	n	-	-	-	-	-	-	0	0	2	0	2	n	0.67	2	1	2	1	y	0.7	7	3	7	3	y	-	-	-	-	-	-	0.0139384	45.6667	up	ENSG00000221817.9
A3SS	novel_NIR_4483	chr10	79746059	79766271	-	79724012	79766271	ENST00000619625.4	novel	0	0	19	0	19	n	0	0	17	0	17	n	0.18	10	47	10	47	y	0.22	4	14	4	14	y	0.27	4	11	4	11	y	0.43	3	4	3	4	y	0.0476305	2.82739	up	ENSG00000225484.6
A3SS	novel_NIR_4605	chr10	91222983	91227337	+	91222983	91240484	ENST00000614189.4	novel	0.89	75	9	75	9	y	0.91	70	7	70	7	y	0.9	128	15	128	15	y	1	80	0	80	0	y	1	92	0	92	0	y	0.94	73	5	73	5	y	0.0479644	3.84308	up	ENSG00000180628.14
A3SS	novel_NIR_4977	chr11	119395154	119409501	+	119395154	119469809	ENST00000498979.6	novel	0	0	6	0	6	n	0	0	10	0	10	n	0.08	1	11	1	11	n	0.45	5	6	5	6	y	0.2	3	12	3	12	y	0.44	4	5	4	5	y	0.0432114	3.91661	up	ENSG00000245248.7
A3SS	novel_NIR_5894	chr11	62670015	62671564	-	62670041	62671564	ENST00000354588.7	novel	0	0	6	0	6	n	-	-	-	-	-	-	0	0	4	0	4	n	1	2	0	2	0	y	0.62	5	3	5	3	y	1	4	0	4	0	y	0.0203947	6.89474	up	ENSG00000162194.12
A3SS	novel_NIR_6285	chr11	67647623	67650583	-	67647589	67650583	ENST00000255082.7	novel	0	0	5	0	5	n	0	0	1	0	1	n	0	0	11	0	11	n	0.22	2	7	2	7	y	0.18	2	9	2	9	y	0.29	2	5	2	5	y	0.0189794	7.15497	up	ENSG00000132744.7
A3SS	novel_NIR_6551	chr11	77813708	77820528	-	77764689	77820528	ENST00000308488.10	novel	-	-	-	-	-	-	0.43	3	4	3	4	y	0.5	2	2	2	2	y	1	4	0	4	0	y	0.91	10	1	10	1	y	1	5	0	5	0	y	0.00439143	10.955	up	ENSG00000048649.13
A3SS	novel_NIR_7343	chr12	130804540	130806982	-	130801488	130806982	ENST00000261653.10	novel	0.06	1	15	1	15	n	0	0	7	0	7	n	0.06	1	15	1	15	n	0.24	6	19	6	19	y	0.2	1	4	1	4	n	0.29	2	5	2	5	n	0.00426207	6.19361	up	ENSG00000111450.13
A3SS	novel_NIR_8696	chr13	110615647	110622216	+	110615647	110627439	ENST00000424185.6	novel	0.85	22	4	22	4	n	0.71	15	6	15	6	y	0.8	59	15	59	15	n	0.97	36	1	36	1	n	1	36	0	36	0	y	1	51	0	51	0	y	0.0322199	4.82247	up	ENSG00000213995.11
A3SS	novel_NIR_11320	chr15	79314005	79314541	+	79314005	79411400	ENST00000424155.6	novel	0.8	12	3	12	3	y	0.64	7	4	7	4	y	0.81	13	3	13	3	y	1	6	0	6	0	y	1	17	0	17	0	y	0.88	15	2	15	2	y	0.0415222	3.08512	up	ENSG00000166557.12
A3SS	novel_NIR_11526	chr15	99148709	99156148	-	99139399	99156148	ENST00000394132.6	novel	0	0	18	0	18	n	0	0	9	0	9	n	0	0	24	0	24	n	0.23	3	10	3	10	y	0.18	2	9	2	9	y	0.15	2	11	2	11	y	0.0152681	8	up	ENSG00000103852.12
A3SS	novel_NIR_13171	chr16	8628876	8629009	+	8628876	8629045	ENST00000561758.5	novel	0	0	1	0	1	n	0	0	1	0	1	n	-	-	-	-	-	-	1	2	0	2	0	y	1	2	0	2	0	y	0.5	2	2	2	2	y	0.0377496	5	up	ENSG00000067365.14
A3SS	novel_NIR_16045	chr19	12271977	12274973	-	12274063	12274973	ENST00000356109.9	novel	0.4	4	6	4	6	y	0.43	3	4	3	4	y	0.6	3	2	3	2	y	1	1	0	1	0	n	0.67	4	2	4	2	y	1	3	0	3	0	y	0.0433576	3.26996	up	ENSG00000197857.13
A3SS	novel_NIR_16782	chr19	36327170	36330253	-	36322030	36330253	ENST00000585356.5	novel	0.31	4	9	4	9	y	0.1	1	9	1	9	n	0.12	3	22	3	22	n	0.71	12	5	12	5	y	0.6	3	2	3	2	y	0.37	13	22	13	22	y	0.0405399	3.18219	up	ENSG00000232677.6
A3SS	novel_NIR_17039	chr19	40348768	40365662	+	40348768	40365718	ENST00000409587.5	novel	0	0	30	0	30	n	0.15	2	11	2	11	y	0.11	4	31	4	31	n	0.24	8	26	8	26	y	0.27	7	19	7	19	y	0.33	13	27	13	27	y	0.0297532	3.71307	up	ENSG00000105223.18
A3SS	novel_NIR_17164	chr19	42370831	42376251	+	42370831	42375507	ENST00000378073.5	novel	0.56	5	4	5	4	y	0.45	5	6	5	6	y	0.74	14	5	14	5	y	0.88	14	2	14	2	y	1	10	0	10	0	y	0.88	15	2	15	2	y	0.0398795	3.60026	up	ENSG00000105429.12
A3SS	novel_NIR_17363	chr19	45691459	45691887	-	45688466	45691887	ENST00000585392.2	novel	0	0	9	0	9	n	0	0	33	0	33	n	0.08	1	11	1	11	n	0.14	2	12	2	12	n	0.28	5	13	5	13	y	0.27	6	16	6	16	y	0.0262649	3.88134	up	ENSG00000125743.10
A3SS	novel_NIR_17364	chr19	45691459	45691887	-	45690667	45691887	ENST00000587367.5	novel	0	0	4	0	4	n	0	0	21	0	21	n	0.05	1	19	1	19	n	0.12	2	14	2	14	n	0.23	5	17	5	17	y	0.17	6	29	6	29	y	0.0219192	4.36384	up	ENSG00000125743.10
A3SS	novel_NIR_18113	chr19	57868579	57888767	-	57858983	57888767	ENST00000595295.1	novel	0.22	2	7	2	7	y	0.33	2	4	2	4	y	0.67	4	2	4	2	y	1	4	0	4	0	y	1	4	0	4	0	y	-	-	-	-	-	-	0.0483596	4.38073	up	ENSG00000204514.9
A3SS	novel_NIR_18259	chr19	6754448	6754616	-	6754425	6754616	ENST00000437152.7	novel	0.5	66	67	66	67	y	0.46	70	81	70	81	y	0.44	108	139	108	139	y	0.52	103	94	103	94	y	0.54	89	75	89	75	y	0.6	128	85	128	85	y	0.0486458	2.90689	up	ENSG00000125731.12
A3SS	novel_NIR_19960	chr2	27070713	27071326	-	27070742	27071326	ENST00000447619.5	novel	0.09	3	32	3	32	n	0.05	3	55	3	55	n	-	-	-	-	-	-	-	-	-	-	-	-	0.9	430	50	430	50	y	1	451	0	451	0	y	0.0177917	16.3412	up	ENSG00000228474.5
A3SS	novel_NIR_21467	chr20	44972158	44973283	+	44972158	44978443	ENST00000372806.7	novel	0	0	1	0	1	n	-	-	-	-	-	-	0	0	11	0	11	n	0.5	4	4	4	4	y	0.25	1	3	1	3	n	0.5	2	2	2	2	y	0.0377496	5	up	ENSG00000101109.11
A3SS	novel_NIR_23076	chr22	40409525	40410132	+	40409525	40409682	ENST00000248929.13	novel	0	0	38	0	38	n	0.05	4	72	4	72	n	0.02	2	95	2	95	n	0.14	5	32	5	32	n	0.09	4	41	4	41	n	0.19	12	52	12	52	y	0.037475	3.60997	up	ENSG00000100359.20
A3SS	novel_NIR_23286	chr22	50372150	50389034	+	50372150	50388986	ENST00000216061.9	novel	0	0	1	0	1	n	0	0	2	0	2	n	0	0	5	0	5	n	0.5	2	2	2	2	y	0.5	1	1	1	1	n	0.75	6	2	6	2	y	0.0198039	7	up	ENSG00000100239.15
A3SS	novel_NIR_23313	chr22	50525918	50526246	-	50524424	50526246	ENST00000543927.5	novel	-	-	-	-	-	-	0	0	3	0	3	n	0	0	10	0	10	n	0.17	1	5	1	5	n	0.21	4	15	4	15	y	0.29	2	5	2	5	n	0.0240533	6.3309	up	ENSG00000130489.12
A3SS	novel_NIR_23557	chr3	123915289	123931102	-	123915718	123931102	ENST00000488653.6	novel	0	0	31	0	31	n	0	0	12	0	12	n	0.13	7	46	7	46	n	0.4	10	15	10	15	y	0.5	7	7	7	7	y	0.2	4	16	4	16	y	0.0480728	3.2905	up	ENSG00000175455.14
A3SS	novel_NIR_24378	chr3	33826580	33826970	+	33826580	33828838	ENST00000457054.6	novel	0.43	6	8	6	8	y	0.5	1	1	1	1	n	0.33	2	4	2	4	y	0.75	3	1	3	1	y	1	4	0	4	0	y	0.73	11	4	11	4	y	0.0240871	4.07119	up	ENSG00000170248.13
A3SS	novel_NIR_26062	chr4	67619064	67622831	-	67619132	67622831	ENST00000322244.9	novel	0	0	38	0	38	n	0	0	18	0	18	n	0.05	2	40	2	40	n	0.17	7	33	7	33	y	0.12	3	23	3	23	n	0.09	2	21	2	21	n	0.022274	3.83617	up	ENSG00000033178.12
A3SS	novel_NIR_26186	chr4	78887284	78888000	+	78887284	78910610	ENST00000335016.9	novel	0.5	5	5	5	5	y	0.56	5	4	5	4	y	0.75	6	2	6	2	y	1	5	0	5	0	y	1	1	0	1	0	n	0.75	6	2	6	2	y	0.0499275	2.78894	up	ENSG00000138756.17
A3SS	novel_NIR_26795	chr5	143057747	143068366	+	143057747	143120988	ENST00000274498.8	novel	0	0	5	0	5	n	0	0	6	0	6	n	0.08	1	11	1	11	n	0.5	2	2	2	2	y	0.6	6	4	6	4	y	0.5	2	2	2	2	y	0.000375214	11.8692	up	ENSG00000145819.15
A3SS	novel_NIR_28269	chr6	155254573	155255432	+	155254573	155256484	ENST00000461783.7	novel	0	0	1	0	1	n	0	0	1	0	1	n	-	-	-	-	-	-	0.67	2	1	2	1	y	1	1	0	1	0	n	1	2	0	2	0	y	0.0149345	8.09091	up	ENSG00000146426.17
A3SS	novel_NIR_28404	chr6	169663801	169664166	-	169662424	169664166	ENST00000448612.5	novel	-	-	-	-	-	-	0.17	2	10	2	10	n	0.29	2	5	2	5	n	1	2	0	2	0	n	1	4	0	4	0	n	0.67	2	1	2	1	y	0.0150154	5.26737	up	ENSG00000184465.15
A3SS	novel_NIR_28492	chr6	25604893	25606079	+	25604893	25606061	ENST00000329474.6	novel	0.23	10	33	10	33	y	0.15	4	22	4	22	y	0.15	8	45	8	45	y	0.27	15	41	15	41	y	0.31	13	29	13	29	y	0.29	19	47	19	47	y	0.0355281	3.90007	up	ENSG00000079691.16
A3SS	novel_NIR_28569	chr6	28329778	28336790	-	28329714	28336790	ENST00000396838.6	novel	0.37	16	27	16	27	y	0.45	15	18	15	18	y	0.5	30	30	30	30	y	0.67	37	18	37	18	y	0.67	16	8	16	8	y	0.71	29	12	29	12	y	0.0150929	6.06232	up	ENSG00000235109.7
A3SS	novel_NIR_29793	chr7	131326895	131327615	-	131326935	131327615	ENST00000429067.5	novel	0	0	6	0	6	n	0.12	2	14	2	14	n	0.5	2	2	2	2	y	-	-	-	-	-	-	0.8	4	1	4	1	y	1	1	0	1	0	n	0.0314766	3.83349	up	ENSG00000236753.5
A3SS	novel_NIR_31851	chr8	25450481	25458199	-	25446250	25458199	ENST00000221200.8	novel	0	0	11	0	11	n	0	0	11	0	11	n	0.12	2	14	2	14	n	0.25	3	9	3	9	y	0.5	1	1	1	1	n	0.42	5	7	5	7	n	0.0237294	4.17338	up	ENSG00000104756.15
A3SS	novel_NIR_32749	chr9	128552696	128553159	+	128552696	128566738	ENST00000372731.8	novel	0.17	2	10	2	10	y	0	0	4	0	4	n	-	-	-	-	-	-	1	2	0	2	0	y	0.5	2	2	2	2	y	1	3	0	3	0	y	0.0318701	3.99985	up	ENSG00000197694.13
A3SS	novel_NIR_33468	chr9	69758255	69759853	-	69750950	69759853	ENST00000340434.4	novel	0.5	4	4	4	4	y	0	0	6	0	6	n	0	0	5	0	5	n	0.71	5	2	5	2	y	0.67	2	1	2	1	y	1	1	0	1	0	n	0.0425841	3.19011	up	ENSG00000188647.12
A3SS	novel_NIR_34434	chrX	48521907	48523754	+	48521907	48523699	ENST00000495186.5	novel	0.06	4	65	4	65	n	0.05	3	53	3	53	n	0.1	12	111	12	111	n	0.15	9	50	9	50	y	0.2	16	65	16	65	y	0.21	23	85	23	85	y	0.00911227	4.85363	up	ENSG00000147155.10
A3SS&ES	known_NIR_970	chr1	224365991	224375795	+	224365991	224371283	ENST00000366856.3	known	0.08	141	1616	141	1616	y	0.07	138	1887	138	1887	y	0.08	199	2427	199	2427	y	0.04	79	1757	79	1757	y	0.05	87	1582	87	1582	y	0.06	124	1982	124	1982	y	0.0248175	-4	down	ENSG00000143771.11
A3SS&ES	known_NIR_5337	chr16	2076585	2079035	+	2076585	2077598	ENST00000219476.7	known	0.53	21	19	21	19	y	0.54	19	16	19	16	y	0.47	27	30	27	30	y	0.4	17	25	17	25	y	0.38	13	21	13	21	y	0.43	21	28	21	28	y	0.0184156	-4.191	down	ENSG00000103197.16
A3SS&ES	known_NIR_8485	chr19	57858983	57888767	-	57885969	57888767	ENST00000597342.5	known	0.39	7	11	7	11	y	0.5	4	4	4	4	n	0.4	2	3	2	3	n	0	0	2	0	2	n	0	0	4	0	4	n	0	0	12	0	12	n	0.00660427	-12.2441	down	ENSG00000204514.9
A3SS&ES	known_NIR_9215	chr2	24762776	24768221	+	24762776	24768079	ENST00000407230.5	known	0.4	8	12	8	12	y	0.67	6	3	6	3	n	0.52	11	10	11	10	y	0.07	1	13	1	13	n	0.29	4	10	4	10	y	0.18	3	14	3	14	y	0.0271456	-3.4769	down	ENSG00000084676.15
A3SS&ES	novel_NIR_1893	chr1	228107757	228108235	-	228108137	228108235	ENST00000459783.5	novel	0.67	2	1	2	1	y	0.57	4	3	4	3	y	-	-	-	-	-	-	0	0	2	0	2	n	0	0	3	0	3	n	0.33	2	4	2	4	y	0.0302377	-4.22079	down	ENSG00000162910.18
A3SS&ES	novel_NIR_5464	chr11	3360788	3370975	-	3362602	3370975	ENST00000438262.6	novel	-	-	-	-	-	-	0.4	2	3	2	3	y	0.33	2	4	2	4	y	0	0	2	0	2	n	0	0	3	0	3	n	0.2	1	4	1	4	n	0.0320397	-3.96216	down	ENSG00000005801.16
A3SS&ES	novel_NIR_7281	chr12	123974020	124011381	+	123974020	123988043	ENST00000618862.1	novel	0.14	3	18	3	18	n	0.2	2	8	2	8	y	0.13	2	13	2	13	n	0	0	14	0	14	n	0	0	10	0	10	n	0	0	16	0	16	n	0.0189153	-7.16743	down	ENSG00000274874.1
A3SS&ES	novel_NIR_9899	chr14	54397077	54401524	+	54397077	54399894	ENST00000442975.6	novel	0.19	124	529	124	529	n	0.2	150	599	150	599	n	0.2	224	880	224	880	n	0.17	101	510	101	510	y	0.18	108	481	108	481	n	0.18	139	644	139	644	n	0.0132356	-4.24264	down	ENSG00000100526.19
A3SS&ES	novel_NIR_11687	chr16	15881376	15884008	-	15883020	15884008	ENST00000573396.5	novel	1	3	0	3	0	y	1	1	0	1	0	n	0.5	2	2	2	2	y	0.2	1	4	1	4	n	-	-	-	-	-	-	0	0	3	0	3	n	0.0338024	-3.77297	down	ENSG00000133393.12
A3SS&ES	novel_NIR_31950	chr8	37516956	37554022	-	37531398	37554022	ENST00000519738.5	novel	0.61	34	22	34	22	y	0.57	48	36	48	36	n	0.39	25	39	25	39	n	0.25	3	9	3	9	y	0	0	34	0	34	n	0.2	8	33	8	33	n	0.0221497	-3.65888	down	ENSG00000253161.5
A3SS&ES	novel_NIR_32731	chr9	128180799	128190329	-	128185776	128190329	ENST00000372954.5	novel	0.39	14	22	14	22	y	0.29	7	17	7	17	y	0.43	20	27	20	27	y	0.12	4	28	4	28	n	0.11	2	16	2	16	n	0.14	2	12	2	12	n	0.0233	-5.79613	down	ENSG00000148337.19
A3SS&ES	known_NIR_1277	chr1	37493814	37501804	-	37496736	37501804	ENST00000373075.6	known	0.89	39	5	39	5	y	0.93	27	2	27	2	y	0.88	50	7	50	7	y	0.95	38	2	38	2	y	1	33	0	33	0	n	0.98	42	1	42	1	n	0.0221253	3.63662	up	ENSG00000163875.15
A3SS&ES	known_NIR_4015	chr13	45379335	45381142	+	45379335	45379926	ENST00000517509.5	known	0.25	1	3	1	3	n	0.32	9	19	9	19	y	0.3	8	19	8	19	y	0.44	14	18	14	18	y	0.4	2	3	2	3	n	0.35	13	24	13	24	y	0.0351786	3.2	up	ENSG00000170919.15
A3SS&ES	known_NIR_5240	chr16	12665020	12781185	-	12705049	12781185	ENST00000381774.8	known	0	0	192	0	192	n	0	0	213	0	213	n	0	0	265	0	265	n	0.07	16	204	16	204	y	0.05	9	183	9	183	y	0.07	16	200	16	200	y	0.0108995	9.5	up	ENSG00000103381.11
A3SS&ES	known_NIR_5434	chr16	28863945	28867374	+	28863945	28866012	ENST00000618521.4	known	0	0	6	0	6	n	0	0	5	0	5	n	0.33	4	8	4	8	y	0.6	3	2	3	2	n	0.6	3	2	3	2	n	0.6	3	2	3	2	n	0.0468802	4.45455	up	ENSG00000178188.14
A3SS&ES	known_NIR_6713	chr17	7016685	7017257	+	7016685	7016910	ENST00000552402.5	known	0.24	95	300	95	300	y	0.2	110	428	110	428	y	0.22	119	424	119	424	y	0.25	99	303	99	303	y	0.27	102	276	102	276	y	0.27	120	318	120	318	y	0.0433079	3.25	up	ENSG00000258315.5
A3SS&ES	known_NIR_6953	chr17	78214789	78222828	+	78214789	78215966	ENST00000301633.8	known	0	0	51	0	51	n	0	0	36	0	36	n	0	0	56	0	56	n	0.02	1	64	1	64	n	0.03	1	39	1	39	n	0.04	2	43	2	43	y	0.0350987	5.19615	up	ENSG00000089685.14
A3SS&ES	novel_NIR_608	chr1	151324917	151327271	-	151326373	151327271	ENST00000368875.6	novel	0	0	17	0	17	n	0.14	1	6	1	6	n	0	0	26	0	26	n	0.23	3	10	3	10	y	0.36	4	7	4	7	y	0.25	4	12	4	12	y	0.0201689	3.77964	up	ENSG00000143393.16
A3SS&ES	novel_NIR_3331	chr1	94931985	94962979	+	94931985	94961317	ENST00000438509.1	novel	0	0	2	0	2	n	0	0	7	0	7	n	0	0	5	0	5	n	0.18	2	9	2	9	y	0.12	2	14	2	14	n	0.09	1	10	1	10	n	0.0390123	4.91354	up	ENSG00000235501.5
A3SS&ES	novel_NIR_5818	chr11	61541297	61551384	-	61546255	61551384	ENST00000540677.5	novel	0	0	6	0	6	n	0	0	1	0	1	n	0	0	4	0	4	n	0.29	2	5	2	5	y	-	-	-	-	-	-	0.33	2	4	2	4	y	0.0410154	15.5	up	ENSG00000011347.9
A3SS&ES	novel_NIR_14135	chr17	44151044	44154556	+	44151044	44152637	ENST00000319977.8	novel	0.12	4	30	4	30	n	0.1	4	38	4	38	n	0.13	6	39	6	39	n	0.19	4	17	4	17	y	0.26	7	20	7	20	y	0.2	6	24	6	24	y	0.0309309	4.24264	up	ENSG00000125319.14
A3SS&ES	novel_NIR_16665	chr19	35508240	35510184	-	35509961	35510184	ENST00000402589.6	novel	0.12	317	2299	317	2299	n	0.12	363	2753	363	2753	n	0.1	427	3834	427	3834	n	0.13	371	2450	371	2450	n	0.15	464	2707	464	2707	y	0.14	490	2934	490	2934	n	0.0400537	3.02372	up	ENSG00000161249.20
A3SS&ES	novel_NIR_17044	chr19	40348768	40366419	+	40348768	40365718	ENST00000409587.5	novel	0.45	25	30	25	30	y	0.52	12	11	12	11	y	0.46	26	31	26	31	y	0.59	38	26	38	26	y	0.67	38	19	38	19	y	0.6	41	27	41	27	y	0.0131885	4.3	up	ENSG00000105223.18
A3SS&ES	novel_NIR_21218	chr20	36092813	36125423	+	36092813	36112426	ENST00000373950.6	novel	0	0	4	0	4	n	0	0	3	0	3	n	0	0	28	0	28	n	0.14	2	12	2	12	n	0.25	2	6	2	6	y	0.27	4	11	4	11	y	0.032129	5.44359	up	ENSG00000088367.20
A3SS&ES	novel_NIR_28577	chr6	28329778	28353862	-	28341795	28353862	ENST00000414429.5	novel	0.27	4	11	4	11	y	0	0	6	0	6	n	0	0	9	0	9	n	0.71	12	5	12	5	y	0.4	4	6	4	6	y	0.38	6	10	6	10	y	0.0451497	2.91137	up	ENSG00000235109.7
A3SS&ES	novel_NIR_31709	chr8	144518041	144519701	+	144518041	144518749	ENST00000529022.5	novel	0	0	8	0	8	n	0	0	5	0	5	n	0.15	2	11	2	11	y	0.43	6	8	6	8	y	0.58	7	5	7	5	y	-	-	-	-	-	-	0.0411935	5.04777	up	ENSG00000160959.7
A3SS&ES	novel_NIR_32531	chr9	121169816	121173357	+	121169816	121171408	ENST00000373855.5	novel	0.08	1	12	1	12	n	0	0	8	0	8	n	0	0	16	0	16	n	0.12	2	15	2	15	n	0.22	2	7	2	7	y	0.2	2	8	2	8	y	0.0200658	3.78118	up	ENSG00000119397.16
A5SS	known_NIR_20	chr1	10450322	10451377	+	10440413	10451377	ENST00000400900.6	known	1	4	0	4	0	n	-	-	-	-	-	-	0.75	9	3	9	3	y	0	0	3	0	3	n	0.33	4	8	4	8	y	0	0	2	0	2	n	0.0304079	-4.59437	down	ENSG00000251503.7
A5SS	known_NIR_741	chr1	1716478	1719358	-	1716478	1719328	ENST00000356200.7	known	0.56	29	23	29	23	y	0.56	15	12	15	12	y	0.6	28	19	28	19	y	0.32	9	19	9	19	y	0.36	10	18	10	18	y	0.42	10	14	10	14	y	0.00917791	-6.46395	down	ENSG00000008128.22
A5SS	known_NIR_1504	chr1	7773198	7773442	+	7771385	7773442	ENST00000054666.10	known	0.22	11	39	11	39	y	0.24	10	32	10	32	y	0.18	11	50	11	50	y	0.16	9	49	9	49	y	0.14	8	49	8	49	y	0.1	5	46	5	46	y	0.0326779	-3.20713	down	ENSG00000049245.12
A5SS	known_NIR_2620	chr11	64320792	64320865	+	64318386	64320865	ENST00000347941.4	known	0.91	2459	250	2459	250	y	0.92	3068	280	3068	280	y	0.92	4088	379	4088	379	y	0.89	2712	320	2712	320	y	0.9	2851	314	2851	314	y	0.9	3088	336	3088	336	y	0.0132356	-4.24264	down	ENSG00000126432.13
A5SS	known_NIR_2701	chr11	66000481	66001910	-	66000481	66002040	ENST00000526451.5	known	0.79	30	8	30	8	y	0.7	26	11	26	11	y	0.58	43	31	43	31	y	0.38	14	23	14	23	y	0.43	22	29	22	29	y	0.42	20	28	20	28	y	0.037372	-4.46455	down	ENSG00000175376.8
A5SS	known_NIR_2844	chr11	71480274	71480755	+	71478469	71480755	ENST00000319023.6	known	0.29	32	78	32	78	y	0.3	36	86	36	86	y	0.25	47	142	47	142	y	0.19	33	143	33	143	y	0.2	17	69	17	69	y	0.18	22	103	22	103	y	0.0176221	-5.51135	down	ENSG00000172890.11
A5SS	known_NIR_3569	chr12	53501708	53502015	+	53501461	53502015	ENST00000266987.6	known	0.19	48	209	48	209	y	0.19	44	187	44	187	y	0.15	49	276	49	276	y	0.13	33	223	33	223	y	0.13	32	215	32	215	y	0.1	25	219	25	219	y	0.0306704	-3.4	down	ENSG00000139546.10
A5SS	known_NIR_4506	chr14	64738224	64738742	+	64737375	64738742	ENST00000247226.11	known	0.41	16	23	16	23	y	0.42	22	30	22	30	y	0.35	28	53	28	53	y	0	0	45	0	45	n	0	0	40	0	40	n	0.2	10	40	10	40	y	0.0294436	-4.65612	down	ENSG00000126822.15
A5SS	known_NIR_5433	chr16	28863945	28866012	+	28863754	28866012	ENST00000322610.12	known	0.5	6	6	6	6	y	0.71	5	2	5	2	n	0.67	8	4	8	4	y	0.4	2	3	2	3	n	0.25	2	6	2	6	n	0.2	2	8	2	8	y	0.0177203	-3.89861	down	ENSG00000178188.14
A5SS	known_NIR_5473	chr16	29888725	29895259	-	29888725	29896822	ENST00000346932.9	known	0.95	37	2	37	2	y	0.98	44	1	44	1	n	0.92	76	7	76	7	y	0.85	55	10	55	10	y	0.82	45	10	45	10	y	0.89	68	8	68	8	y	0.0231963	-3.625	down	ENSG00000174938.14
A5SS	known_NIR_6180	chr17	20232414	20236860	+	20232405	20236860	ENST00000395529.7	known	0.3	8	19	8	19	y	0.33	14	28	14	28	y	0.23	10	34	10	34	y	0.15	6	35	6	35	y	0.21	11	42	11	42	y	0.15	4	22	4	22	y	0.03748	-3.26377	down	ENSG00000128487.16
A5SS	known_NIR_6656	chr17	63435791	63436007	-	63435791	63436054	ENST00000392975.6	known	0.11	3	25	3	25	y	0.09	4	42	4	42	y	0.1	6	57	6	57	y	0.04	3	64	3	64	y	0.05	4	75	4	75	y	0	0	72	0	72	n	0.0319026	-4.28661	down	ENSG00000008283.15
A5SS	known_NIR_6681	chr17	64531022	64531890	+	64531018	64531890	ENST00000556440.6	known	0.21	4	15	4	15	y	0.15	4	22	4	22	y	0.12	5	36	5	36	y	0	0	22	0	22	n	0.05	1	19	1	19	n	0.05	1	21	1	21	n	0.0216709	-4.05081	down	ENSG00000258890.6
A5SS	known_NIR_6688	chr17	67992103	67992901	-	67992103	67993044	ENST00000449250.2	known	0.52	15	14	15	14	y	0.5	11	11	11	11	y	0.44	20	25	20	25	y	0.17	2	10	2	10	y	0.15	2	11	2	11	y	0.21	7	27	7	27	y	0.00074575	-10.3977	down	ENSG00000186665.8
A5SS	known_NIR_6948	chr17	78205753	78205946	+	78202751	78205946	ENST00000588800.5	known	0.14	6	38	6	38	y	0.09	4	42	4	42	y	0.12	9	64	9	64	y	0	0	52	0	52	n	0.04	2	43	2	43	y	0	0	46	0	46	n	0.0064698	-5.23996	down	ENSG00000183077.15
A5SS	known_NIR_6949	chr17	78205753	78205946	+	78205738	78205946	ENST00000409257.9	known	0.55	6	5	6	5	y	0.36	4	7	4	7	y	0.35	9	17	9	17	y	0	0	2	0	2	n	0.2	2	8	2	8	y	0	0	2	0	2	n	0.0192403	-3.79298	down	ENSG00000183077.15
A5SS	known_NIR_7548	chr19	17935191	17936410	+	17933048	17936410	ENST00000445755.6	known	0.04	11	284	11	284	y	0.04	16	412	16	412	y	0.07	38	494	38	494	y	0	2	422	2	422	y	0.02	9	465	9	465	y	0.01	3	459	3	459	y	0.0366415	-3.4641	down	ENSG00000007080.10
A5SS	known_NIR_7549	chr19	18008584	18008711	+	18001573	18008711	ENST00000379656.7	known	0.31	4	9	4	9	y	0.27	3	8	3	8	y	0.33	10	20	10	20	y	0.09	2	21	2	21	y	0	0	16	0	16	n	0.08	1	12	1	12	n	0.00356884	-7.36328	down	ENSG00000105643.9
A5SS	known_NIR_8166	chr19	46846142	46850134	-	46846142	46850764	ENST00000352203.8	known	0.04	128	3064	128	3064	y	0.04	135	3311	135	3311	y	0.05	229	4789	229	4789	y	0.03	102	3270	102	3270	y	0.02	92	3728	92	3728	y	0.03	116	3867	116	3867	y	0.0241101	-3.53553	down	ENSG00000042753.11
A5SS	known_NIR_8304	chr19	49669115	49673698	+	49669164	49673698	ENST00000619007.4	known	0.88	159	22	159	22	y	0.88	228	32	228	32	y	0.85	296	54	296	54	y	0.8	245	60	245	60	y	0.84	195	37	195	37	y	0.83	245	51	245	51	y	0.0422506	-2.98481	down	ENSG00000126453.9
A5SS	known_NIR_8308	chr19	49670488	49673698	+	49668937	49673698	ENST00000600947.5	known	0.98	797	14	797	14	y	0.99	1127	14	1127	14	y	0.98	1368	35	1368	35	y	0.95	972	52	972	52	y	0.97	1085	37	1085	37	y	0.96	1082	40	1082	40	y	0.0356527	-3.5	down	ENSG00000126453.9
A5SS	known_NIR_8330	chr19	49873302	49876603	-	49873302	49878170	ENST00000391834.6	known	0.95	54	3	54	3	y	1	59	0	59	0	n	1	87	0	87	0	n	0.89	66	8	66	8	y	0.88	59	8	59	8	y	0.94	66	4	66	4	y	0.0332125	-3.20713	down	ENSG00000204673.10
A5SS	known_NIR_8399	chr19	53869598	53869754	+	53866417	53869754	ENST00000336967.7	known	1	4	0	4	0	n	1	2	0	2	0	n	1	2	0	2	0	n	0	0	3	0	3	n	0	0	8	0	8	n	0.5	5	5	5	5	y	0.0377496	-5	down	ENSG00000179820.15
A5SS	known_NIR_9084	chr2	231710301	231711348	+	231708751	231711348	ENST00000409321.5	known	0.04	550	12147	550	12147	y	0.05	573	11551	573	11551	y	0.05	971	19433	971	19433	y	0	0	13381	0	13381	n	0	0	13249	0	13249	n	0	0	14669	0	14669	n	0.00506332	-14	down	ENSG00000187514.14
A5SS	known_NIR_10137	chr21	43882615	43903957	+	43865345	43903957	ENST00000291572.12	known	0.23	3	10	3	10	y	0.24	4	13	4	13	y	0.26	12	34	12	34	y	0	0	9	0	9	n	0.11	1	8	1	8	n	0.09	1	10	1	10	n	0.0283052	-5.05335	down	ENSG00000160216.18
A5SS	known_NIR_10290	chr22	20507735	20537117	+	20507746	20537117	ENST00000292733.11	known	0.05	3	56	3	56	y	0.05	2	36	2	36	y	0.04	3	72	3	72	y	0.02	2	82	2	82	y	0	0	88	0	88	n	0.01	1	85	1	85	n	0.00996386	-5.5	down	ENSG00000099917.17
A5SS	known_NIR_10729	chr3	129134195	129134828	-	129134195	129134832	ENST00000418265.1	known	0.04	9	236	9	236	y	0.06	12	199	12	199	y	0.06	16	259	16	259	y	0.02	4	175	4	175	y	0.02	4	194	4	194	y	0.03	6	219	6	219	y	0.0285958	-4.02492	down	ENSG00000261796.1
A5SS	known_NIR_10875	chr3	158110211	158122103	+	158110223	158122103	ENST00000611884.4	known	0.68	26	12	26	12	y	0.73	11	4	11	4	y	0.6	26	17	26	17	y	0.26	5	14	5	14	y	0.43	6	8	6	8	y	0.43	10	13	10	13	y	0.0163202	-4.35313	down	ENSG00000174891.12
A5SS	known_NIR_10958	chr3	185283119	185285517	+	185283027	185285517	ENST00000448876.5	known	0.15	6	34	6	34	y	0.15	7	41	7	41	y	0.18	13	59	13	59	y	0	0	35	0	35	n	0	0	35	0	35	n	0.09	5	51	5	51	y	0.0383797	-4.11096	down	ENSG00000073803.13
A5SS	known_NIR_11223	chr3	49975392	50048245	+	49962685	50048245	ENST00000442092.5	known	0.6	9	6	9	6	y	0.6	6	4	6	4	y	0.61	11	7	11	7	y	0.2	5	20	5	20	y	0.12	3	22	3	22	y	0.14	1	6	1	6	n	0.00243372	-18.5437	down	ENSG00000004534.14
A5SS	known_NIR_11253	chr3	51671331	51674271	+	51671547	51674271	ENST00000395057.5	known	0.45	5	6	5	6	y	-	-	-	-	-	-	0.47	7	8	7	8	y	-	-	-	-	-	-	0	0	3	0	3	n	0	0	9	0	9	n	0.0138374	-46	down	ENSG00000164081.12
A5SS	known_NIR_11333	chr3	58306651	58310507	+	58306417	58310507	ENST00000477305.5	known	0.3	7	16	7	16	y	0.2	5	20	5	20	y	0.22	12	42	12	42	y	0.1	2	19	2	19	y	0.11	2	16	2	16	y	0.14	6	36	6	36	y	0.0418924	-3.75678	down	ENSG00000255154.7
A5SS	known_NIR_11467	chr4	108663306	108667247	+	108655657	108667247	ENST00000613215.4	known	0.19	9	39	9	39	y	0.2	4	16	4	16	y	0.11	3	24	3	24	y	0	0	20	0	20	n	0.07	2	25	2	25	y	0.03	1	38	1	38	n	0.0227421	-3.81385	down	ENSG00000198856.12
A5SS	known_NIR_11478	chr4	113454515	113457291	-	113454515	113457335	ENST00000394524.7	known	0.4	6	9	6	9	y	0.43	3	4	3	4	n	0.31	4	9	4	9	y	0.26	6	17	6	17	y	0.18	2	9	2	9	y	0.16	4	21	4	21	y	0.0199077	-3.80887	down	ENSG00000145349.16
A5SS	known_NIR_11529	chr4	145096111	145098131	-	145096111	145098120	ENST00000507656.5	known	0.31	17	37	17	37	y	0.34	19	37	19	37	y	0.35	34	64	34	64	y	0.26	17	48	17	48	y	0.25	19	56	19	56	y	0.3	21	49	21	49	y	0.0336672	-3.25847	down	ENSG00000164162.12
A5SS	known_NIR_11566	chr4	174492094	174493151	-	174492094	174508696	ENST00000542498.5	known	1	159	0	159	0	n	0.98	52	1	52	1	n	0.99	176	1	176	1	n	0.96	100	4	100	4	y	0.96	44	2	44	2	y	0.96	126	5	126	5	y	0.0350987	-5.19615	down	ENSG00000164120.13
A5SS	known_NIR_11689	chr4	499725	500396	+	499489	500396	ENST00000310340.9	known	0.07	3	40	3	40	y	0.15	4	23	4	23	y	0.11	4	33	4	33	y	0	0	35	0	35	n	0	0	25	0	25	n	0.06	2	34	2	34	y	0.0432074	-2.94594	down	ENSG00000174227.15
A5SS	known_NIR_11717	chr4	6987349	6994184	+	6967424	6994184	ENST00000448507.5	known	0.33	4	8	4	8	y	0.47	9	10	9	10	y	0.45	9	11	9	11	y	0.18	3	14	3	14	y	0.29	4	10	4	10	y	0.14	4	24	4	24	y	0.0271452	-3.40638	down	ENSG00000132405.18
A5SS	known_NIR_12161	chr5	179559835	179560025	+	179550879	179560025	ENST00000319449.8	known	0.18	2	9	2	9	y	0.25	5	15	5	15	y	0.12	2	14	2	14	y	0	0	2	0	2	n	0	0	15	0	15	n	0	0	9	0	9	n	0.0395119	-4.88046	down	ENSG00000176783.14
A5SS	known_NIR_12249	chr5	43555999	43556819	-	43555999	43556582	ENST00000306846.7	known	0.32	58	126	58	126	y	0.3	26	61	26	61	y	0.27	61	164	61	164	y	0.23	39	131	39	131	y	0.23	27	92	27	92	y	0.25	32	94	32	94	y	0.0370313	-3.75326	down	ENSG00000172239.13
A5SS	known_NIR_12312	chr5	70025731	70026407	+	70025458	70026407	ENST00000380751.9	known	0.06	36	607	36	607	y	0.05	33	651	33	651	y	0.06	53	852	53	852	y	0.04	26	565	26	565	y	0.03	17	528	17	528	y	0.04	29	643	29	643	y	0.0132356	-4.24264	down	ENSG00000205572.9
A5SS	known_NIR_12416	chr6	106583420	106587679	-	106583420	106619202	ENST00000539449.2	known	1	88	0	88	0	n	1	120	0	120	0	n	1	152	0	152	0	n	0.98	113	2	113	2	y	0.97	105	3	105	3	y	0.98	105	2	105	2	y	0.0198039	-7	down	ENSG00000130347.12
A5SS	known_NIR_12717	chr6	31557804	31558022	+	31557849	31558022	ENST00000376148.8	known	0.36	27	47	27	47	y	0.36	34	60	34	60	y	0.36	40	71	40	71	y	0.27	23	61	23	61	y	0.16	14	71	14	71	y	0.17	12	60	12	60	y	0.0449534	-4.55596	down	ENSG00000204498.10
A5SS	known_NIR_12843	chr6	36678939	36684097	+	36677933	36684097	ENST00000448526.6	known	0.95	19	1	19	1	n	1	29	0	29	0	n	1	53	0	53	0	n	0.64	38	21	38	21	y	0.68	38	18	38	18	y	0.64	18	10	18	10	y	0.000139183	-15.4612	down	ENSG00000124762.13
A5SS	known_NIR_13445	chr7	44748991	44756188	+	44748631	44756188	ENST00000413916.5	known	-	-	-	-	-	-	1	10	0	10	0	n	1	14	0	14	0	n	0.8	8	2	8	2	y	0.64	7	4	7	4	y	0.6	3	2	3	2	n	0.0345784	-5.23723	down	ENSG00000122515.14
A5SS	known_NIR_13462	chr7	44984426	44985882	-	44984426	44986021	ENST00000578968.5	known	0.08	24	271	24	271	y	0.07	19	267	19	267	y	0.07	26	345	26	345	y	0.06	17	266	17	266	y	0.05	13	242	13	242	y	0.06	20	325	20	325	y	0.0241101	-3.53553	down	ENSG00000232956.8
A5SS	known_NIR_13601	chr7	76005404	76013742	-	76005404	76028642	ENST00000360591.7	known	0.95	254	12	254	12	y	0.97	262	8	262	8	y	0.97	385	13	385	13	y	0.91	323	32	323	32	y	0.94	303	21	303	21	y	0.92	330	27	330	27	y	0.0253033	-3.61814	down	ENSG00000127952.16
A5SS	known_NIR_13603	chr7	76030524	76047812	-	76030524	76047662	ENST00000248600.5	known	0.88	100	14	100	14	y	0.88	120	17	120	17	y	0.89	158	20	158	20	y	0.85	160	28	160	28	y	0.86	151	25	151	25	y	0.87	155	24	155	24	y	0.0356527	-3.5	down	ENSG00000127952.16
A5SS	known_NIR_13884	chr8	144161089	144163771	+	144148076	144163771	ENST00000423230.6	known	0.76	16	5	16	5	y	0.85	17	3	17	3	y	0.82	31	7	31	7	y	0.62	20	12	20	12	y	0.5	8	8	8	8	y	0.64	16	9	16	9	y	0.0182499	-4.3706	down	ENSG00000179832.17
A5SS	known_NIR_14041	chr8	55740218	55743481	-	55740218	55750964	ENST00000334667.6	known	1	48	0	48	0	n	0.98	81	2	81	2	y	0.96	107	4	107	4	y	0.91	81	8	81	8	y	0.91	41	4	41	4	y	0.88	56	8	56	8	y	0.00671538	-5.23723	down	ENSG00000167904.14
A5SS	known_NIR_14183	chr9	100429662	100441906	+	100427393	100441906	ENST00000395067.6	known	0.45	10	12	10	12	y	0.5	5	5	5	5	y	0.32	14	30	14	30	y	0.21	5	19	5	19	y	0.11	2	17	2	17	y	0.19	3	13	3	13	y	0.0234902	-4.10361	down	ENSG00000066697.14
A5SS	known_NIR_14423	chr9	137216166	137216272	+	137216188	137216272	ENST00000344894.9	known	0.38	10	16	10	16	y	0.27	12	33	12	33	y	0.18	6	28	6	28	y	0.12	5	35	5	35	y	0	0	23	0	23	n	0	0	30	0	30	n	0.0336814	-3.36572	down	ENSG00000188566.11
A5SS	known_NIR_14668	chrX	11111518	11112019	+	11111423	11112019	ENST00000380763.7	known	1	114	0	114	0	n	1	92	0	92	0	n	1	213	0	213	0	n	0.98	118	2	118	2	y	0.97	166	5	166	5	y	0.98	184	4	184	4	y	0.0198039	-7	down	ENSG00000004961.14
A5SS	novel_NIR_240	chr1	113698387	113698992	-	113698387	113699704	ENST00000393357.6	novel	0.23	7	23	7	23	y	0.19	3	13	3	13	y	0.13	5	34	5	34	n	0	0	8	0	8	n	0	0	14	0	14	n	0.03	1	32	1	32	n	0.0182804	-5.64019	down	ENSG00000116793.15
A5SS	novel_NIR_1118	chr1	1623482	1623774	+	1623699	1623774	ENST00000520777.5	novel	0.25	2	6	2	6	y	0.5	2	2	2	2	y	0.38	3	5	3	5	y	0	0	7	0	7	n	0.15	3	17	3	17	y	0	0	5	0	5	n	0.0251533	-3.72003	down	ENSG00000197530.12
A5SS	novel_NIR_1402	chr1	18921121	18928036	-	18921121	18955668	ENST00000455833.6	novel	0.32	8	17	8	17	y	0.26	5	14	5	14	y	0.31	9	20	9	20	y	0	0	25	0	25	n	0	0	15	0	15	n	0.14	4	25	4	25	n	0.021381	-4.97792	down	ENSG00000169991.10
A5SS	novel_NIR_1726	chr1	213013418	213015226	-	213013418	213015613	ENST00000366962.7	novel	0.38	5	8	5	8	y	0.38	5	8	5	8	y	0.44	18	23	18	23	y	0.23	5	17	5	17	y	0.32	6	13	6	13	y	0.29	4	10	4	10	y	0.0253033	-3.61814	down	ENSG00000174606.12
A5SS	novel_NIR_2361	chr1	31668855	31669811	-	31668855	31670602	ENST00000373672.7	novel	0.67	4	2	4	2	y	0.73	8	3	8	3	y	1	4	0	4	0	y	0.38	3	5	3	5	y	0	0	5	0	5	n	0	0	2	0	2	n	0.0157124	-4.14845	down	ENSG00000084636.17
A5SS	novel_NIR_2451	chr1	3454844	3463066	+	3454811	3463066	ENST00000378378.8	novel	0.4	8	12	8	12	y	0.29	4	10	4	10	y	0.32	9	19	9	19	y	0	0	26	0	26	n	0.13	3	20	3	20	n	0.13	4	27	4	27	n	0.0118516	-4.59855	down	ENSG00000130762.14
A5SS	novel_NIR_3261	chr1	92300502	92301476	+	92300239	92301476	ENST00000610020.1	novel	0.27	4	11	4	11	n	0.33	3	6	3	6	y	0.47	7	8	7	8	n	0	0	8	0	8	n	0.12	1	7	1	7	n	0	0	5	0	5	n	0.0152816	-4.4294	down	ENSG00000122484.8
A5SS	novel_NIR_3656	chr10	122855786	122858606	-	122855786	122879485	ENST00000368898.7	novel	0.14	2	12	2	12	n	0.2	4	16	4	16	n	0.15	3	17	3	17	y	0	0	8	0	8	n	0	0	7	0	7	n	0.05	1	20	1	20	n	0.00433298	-5.87975	down	ENSG00000213185.6
A5SS	novel_NIR_3678	chr10	123163974	123165047	+	123157880	123165047	ENST00000368859.6	novel	0.14	2	12	2	12	n	0.11	1	8	1	8	n	0.15	2	11	2	11	y	0	0	6	0	6	n	0	0	4	0	4	n	0	0	11	0	11	n	0.0080273	-11.094	down	ENSG00000154473.17
A5SS	novel_NIR_6141	chr11	66017174	66018788	-	66017174	66018827	ENST00000312106.5	novel	0.5	10	10	10	10	y	0.64	18	10	18	10	y	0.55	12	10	12	10	y	0.31	5	11	5	11	y	0.25	5	15	5	15	y	0.18	5	23	5	23	y	0.00479509	-5.69772	down	ENSG00000175294.5
A5SS	novel_NIR_6311	chr11	68081457	68081727	-	68081457	68097019	ENST00000265689.8	novel	0.29	20	49	20	49	y	0.31	26	58	26	58	y	0.21	26	95	26	95	y	0.16	18	96	18	96	y	0.12	10	72	10	72	n	0.12	13	99	13	99	n	0.0312676	-4.1	down	ENSG00000110721.11
A5SS	novel_NIR_7171	chr12	121453344	121467158	-	121453344	121494579	ENST00000377069.8	novel	1	4	0	4	0	y	1	5	0	5	0	y	1	5	0	5	0	y	0.71	5	2	5	2	y	0.86	12	2	12	2	y	0.78	7	2	7	2	y	0.0377496	-5	down	ENSG00000089094.16
A5SS	novel_NIR_8660	chr13	100527344	100527675	+	100449305	100527675	ENST00000376279.7	novel	0.2	2	8	2	8	y	0.27	3	8	3	8	y	0.3	3	7	3	7	y	0	0	4	0	4	n	0	0	19	0	19	n	0.08	2	23	2	23	n	0.00463103	-5.77007	down	ENSG00000175198.14
A5SS	novel_NIR_8695	chr13	110507635	110507935	+	110506606	110507935	ENST00000360467.5	novel	1	4	0	4	0	y	1	2	0	2	0	y	1	5	0	5	0	y	0.33	2	4	2	4	y	0.62	5	3	5	3	y	0.44	4	5	4	5	y	0.0239197	-6.34922	down	ENSG00000134871.17
A5SS	novel_NIR_9358	chr14	104792722	104795011	-	104792722	104795484	ENST00000407796.6	novel	0.18	4	18	4	18	y	0.27	6	16	6	16	y	0.27	7	19	7	19	y	0.1	4	37	4	37	n	0	0	48	0	48	n	0.15	8	47	8	47	y	0.049682	-2.9375	down	ENSG00000142208.15
A5SS	novel_NIR_9414	chr14	105491118	105491622	+	105491126	105491622	ENST00000551180.1	novel	0.25	5	15	5	15	y	0.28	7	18	7	18	y	0.29	12	30	12	30	y	0.16	3	16	3	16	y	0.21	6	23	6	23	y	0.18	5	23	5	23	y	0.00960454	-4.77297	down	ENSG00000257341.5
A5SS	novel_NIR_9994	chr14	60277091	60282684	+	60249677	60282684	ENST00000395076.8	novel	0.17	2	10	2	10	y	0.2	1	4	1	4	n	0.29	5	12	5	12	n	0.13	3	20	3	20	n	0	0	19	0	19	n	0.09	1	10	1	10	n	0.0499048	-2.7828	down	ENSG00000100614.17
A5SS	novel_NIR_10261	chr14	75053659	75056447	-	75053659	75061684	ENST00000357971.7	novel	0.18	6	27	6	27	y	0.15	4	23	4	23	n	0.11	4	33	4	33	n	0	0	35	0	35	n	0.06	2	30	2	30	n	0	0	28	0	28	n	0.0112727	-4.44756	down	ENSG00000119640.8
A5SS	novel_NIR_11479	chr15	90955883	90956612	+	90954948	90956612	ENST00000394258.6	novel	0.4	2	3	2	3	y	0.4	4	6	4	6	n	0.27	6	16	6	16	y	0	0	12	0	12	n	0.14	1	6	1	6	n	0	0	5	0	5	n	0.00834706	-4.86784	down	ENSG00000166965.12
A5SS	novel_NIR_12165	chr16	29830315	29830474	+	29820510	29830474	ENST00000395353.5	novel	0.14	3	18	3	18	n	0.17	4	19	4	19	y	0.25	7	21	7	21	y	0.11	2	17	2	17	n	0.04	1	26	1	26	n	0.03	1	38	1	38	n	0.0409643	-3.06213	down	ENSG00000013364.18
A5SS	novel_NIR_12666	chr16	58001588	58002479	+	58001581	58002479	ENST00000219281.7	novel	0.15	13	73	13	73	y	0.08	5	61	5	61	n	0.1	9	77	9	77	n	0	0	95	0	95	n	0.01	1	79	1	79	n	0.05	4	76	4	76	n	0.0289781	-3.48569	down	ENSG00000103005.11
A5SS	novel_NIR_12880	chr16	69329179	69330268	-	69329179	69330813	ENST00000306875.8	novel	0.15	11	64	11	64	y	0.15	11	63	11	63	y	0.16	16	86	16	86	y	0.13	9	58	9	58	n	0.12	7	49	7	49	n	0.14	12	76	12	76	n	0.0356527	-3.5	down	ENSG00000213380.13
A5SS	novel_NIR_13356	chr16	89909107	89910591	+	89909083	89910591	ENST00000263347.11	novel	0.67	55	27	55	27	y	0.62	80	49	80	49	y	0.66	119	61	119	61	y	0.55	73	60	73	60	y	0.6	77	52	77	52	y	0.58	92	67	92	67	y	0.0254888	-3.47851	down	ENSG00000141002.18
A5SS	novel_NIR_13867	chr17	36313637	36314084	+	36313682	36314084	ENST00000569955.2	novel	-	-	-	-	-	-	1	2	0	2	0	y	0.75	3	1	3	1	y	0	0	5	0	5	n	0	0	4	0	4	n	0.5	2	2	2	2	y	0.042667	-3.4	down	ENSG00000261499.2
A5SS	novel_NIR_13905	chr17	38117740	38118187	+	38117785	38118187	ENST00000611212.1	novel	-	-	-	-	-	-	1	2	0	2	0	y	0.75	3	1	3	1	y	0	0	5	0	5	n	0	0	4	0	4	n	0.5	2	2	2	2	y	0.042667	-3.4	down	ENSG00000274615.1
A5SS	novel_NIR_13908	chr17	38202334	38202781	-	38202334	38202736	ENST00000620148.1	novel	-	-	-	-	-	-	1	2	0	2	0	y	0.75	3	1	3	1	y	0	0	5	0	5	n	0	0	3	0	3	n	0.5	2	2	2	2	y	0.042667	-3.4	down	ENSG00000274487.1
A5SS	novel_NIR_14624	chr17	61356986	61368327	+	61084564	61368327	ENST00000589222.5	novel	0.17	4	20	4	20	y	0.11	2	17	2	17	n	0.09	3	32	3	32	n	0	0	24	0	24	n	0.06	2	33	2	33	n	0	0	19	0	19	n	0.0312835	-3.30461	down	ENSG00000141376.20
A5SS	novel_NIR_15239	chr17	7909384	7910428	+	7909338	7910428	ENST00000380358.8	novel	0.3	55	131	55	131	y	0.34	79	156	79	156	y	0.33	87	174	87	174	y	0.23	54	185	54	185	y	0.25	57	169	57	169	y	0.27	60	162	60	162	y	0.011733	-4.4	down	ENSG00000170004.16
A5SS	novel_NIR_15315	chr17	81551203	81551732	-	81551203	81551928	ENST00000327787.12	novel	0.69	9	4	9	4	y	1	2	0	2	0	y	0.79	11	3	11	3	y	0.56	5	4	5	4	y	0.46	12	14	12	14	y	0.27	4	11	4	11	y	0.0338347	-3.17814	down	ENSG00000185504.16
A5SS	novel_NIR_17291	chr19	44289196	44298820	-	44289196	44298808	ENST00000291182.8	novel	1	1	0	1	0	n	1	2	0	2	0	y	-	-	-	-	-	-	0	0	2	0	2	n	0	0	3	0	3	n	0.5	2	2	2	2	y	0.0377496	-5	down	ENSG00000159917.14
A5SS	novel_NIR_18192	chr19	58517673	58519270	-	58517673	58519263	ENST00000354590.7	novel	-	-	-	-	-	-	0.5	4	4	4	4	y	0.67	4	2	4	2	y	0.2	1	4	1	4	n	0.08	1	12	1	12	n	0	0	18	0	18	n	0.0436182	-4.77486	down	ENSG00000119574.12
A5SS	novel_NIR_18308	chr19	902130	902242	-	902130	913087	ENST00000361574.9	novel	0.17	22	110	22	110	y	0.13	15	101	15	101	n	0.13	26	177	26	177	n	0.07	11	157	11	157	n	0.07	12	170	12	170	n	0.06	8	130	8	130	n	0.023431	-5.57832	down	ENSG00000198858.9
A5SS	novel_NIR_18627	chr2	113625729	113626216	-	113625729	113626830	ENST00000416673.6	novel	0.29	5	12	5	12	y	0.2	8	32	8	32	n	0.23	6	20	6	20	n	0	0	41	0	41	n	0	0	14	0	14	n	0.02	1	41	1	41	n	0.00922179	-8.55186	down	ENSG00000240356.6
A5SS	novel_NIR_18871	chr2	152716126	152717230	-	152716126	152717356	ENST00000410080.5	novel	0.2	8	33	8	33	y	0.29	6	15	6	15	y	0.29	8	20	8	20	y	0.11	4	31	4	31	n	0.19	7	29	7	29	y	0.12	6	45	6	45	n	0.0389991	-3.06452	down	ENSG00000196504.15
A5SS	novel_NIR_19465	chr2	218660748	218660939	+	218660421	218660939	ENST00000439945.5	novel	0.15	3	17	3	17	n	0.11	2	17	2	17	n	0.15	6	33	6	33	y	0	0	17	0	17	n	0	0	26	0	26	n	0.08	4	49	4	49	n	0.0356963	-3.68951	down	ENSG00000074582.12
A5SS	novel_NIR_19873	chr2	241671551	241672191	+	241671441	241672191	ENST00000402096.5	novel	0.08	1	11	1	11	n	0.19	5	21	5	21	y	0.13	2	13	2	13	n	0	0	7	0	7	n	0.05	1	19	1	19	n	0	0	10	0	10	n	0.0470148	-3.24967	down	ENSG00000168397.16
A5SS	novel_NIR_20590	chr2	74507147	74507358	-	74507147	74507576	ENST00000233630.10	novel	0.24	17	55	17	55	y	0.21	12	44	12	44	y	0.21	18	66	18	66	y	0.13	7	45	7	45	n	0.13	8	52	8	52	n	0.11	6	47	6	47	n	0.002276	-8.04315	down	ENSG00000115289.12
A5SS	novel_NIR_21973	chr21	32501538	32503926	+	32501486	32503926	ENST00000382699.7	novel	0.31	17	38	17	38	y	0.34	13	25	13	25	y	0.25	18	53	18	53	y	0.24	10	32	10	32	y	0.15	5	28	5	28	y	0.18	7	31	7	31	y	0.0423945	-2.93987	down	ENSG00000166979.12
A5SS	novel_NIR_22902	chr22	35264096	35264648	+	35263874	35264648	ENST00000216106.5	novel	0.33	2	4	2	4	n	0.6	3	2	3	2	n	0.67	4	2	4	2	y	0	0	2	0	2	n	-	-	-	-	-	-	0	0	2	0	2	n	0.0357596	-5.14525	down	ENSG00000100281.13
A5SS	novel_NIR_23697	chr3	134559305	134561377	+	134559429	134561377	ENST00000513612.6	novel	1	4	0	4	0	y	0.75	3	1	3	1	y	0.86	6	1	6	1	y	0	0	1	0	1	n	0	0	2	0	2	n	0	0	1	0	1	n	0.00684328	-12.0262	down	ENSG00000182923.16
A5SS	novel_NIR_24659	chr3	48631306	48631763	-	48631306	48631649	ENST00000420764.6	novel	0.25	2	6	2	6	y	0.16	3	16	3	16	y	0.25	3	9	3	9	y	0	0	20	0	20	n	0	0	17	0	17	n	0.07	1	14	1	14	n	0.0077713	-5.17464	down	ENSG00000225697.10
A5SS	novel_NIR_24804	chr3	50570801	50570931	+	50569574	50570931	ENST00000232854.8	novel	0.08	1	11	1	11	n	0.16	3	16	3	16	y	0.16	6	32	6	32	y	0	0	21	0	21	n	0	0	14	0	14	n	0	0	21	0	21	n	0.0377496	-5	down	ENSG00000114735.9
A5SS	novel_NIR_26732	chr5	140538234	140538919	+	140538261	140538919	ENST00000297183.10	novel	0.25	46	138	46	138	y	0.2	34	137	34	137	y	0.21	50	187	50	187	y	0.14	22	139	22	139	n	0.16	31	165	31	165	y	0.17	39	191	39	191	y	0.0333003	-3.59066	down	ENSG00000131503.20
A5SS	novel_NIR_29548	chr7	102396537	102399548	+	102376322	102399548	ENST00000462601.5	novel	0.25	2	6	2	6	y	0.2	2	8	2	8	y	-	-	-	-	-	-	0	0	9	0	9	n	0.14	3	18	3	18	n	0	0	8	0	8	n	0.04705	-3.36851	down	ENSG00000128563.13
A5SS	novel_NIR_30135	chr7	1569360	1569846	-	1569360	1570009	ENST00000404674.7	novel	0.18	9	41	9	41	y	0.16	6	32	6	32	y	0.27	18	49	18	49	y	0.13	8	53	8	53	n	0.05	4	74	4	74	n	0	0	54	0	54	n	0.0483697	-2.82309	down	ENSG00000157778.8
A5SS	novel_NIR_31186	chr8	109540111	109550810	+	109539919	109550810	ENST00000395785.6	novel	0.8	4	1	4	1	y	1	4	0	4	0	y	-	-	-	-	-	-	0	0	2	0	2	n	0	0	12	0	12	n	0.5	2	2	2	2	y	0.0338024	-3.77297	down	ENSG00000147654.14
A5SS	novel_NIR_31459	chr8	140890769	140948666	-	140890769	141001125	ENST00000519881.5	novel	0.22	2	7	2	7	y	0.4	2	3	2	3	n	0.5	5	5	5	5	n	0	0	4	0	4	n	0	0	4	0	4	n	0	0	2	0	2	n	0.0449302	-4.55722	down	ENSG00000169398.19
A5SS	novel_NIR_31638	chr8	143739705	143739859	+	143735938	143739859	ENST00000533004.5	novel	1	2	0	2	0	y	0.5	2	2	2	2	y	0.6	3	2	3	2	y	-	-	-	-	-	-	0	0	3	0	3	n	0	0	3	0	3	n	0.0444669	-4.58258	down	ENSG00000203499.10
A5SS	novel_NIR_31822	chr8	22579209	22580603	+	22579224	22580603	ENST00000397761.6	novel	0.86	6	1	6	1	y	0.87	13	2	13	2	y	0.58	14	10	14	10	y	0.33	3	6	3	6	y	0	0	18	0	18	n	0.13	3	20	3	20	n	0.0102984	-4.56547	down	ENSG00000120913.23
A5SS	novel_NIR_31823	chr8	22579209	22580603	+	22579527	22580603	ENST00000339162.11	novel	0.1	6	57	6	57	n	0.21	13	49	13	49	y	0.14	14	86	14	86	n	0.04	3	72	3	72	n	0	0	68	0	68	n	0.04	3	64	3	64	n	0.0460416	-3.54396	down	ENSG00000120913.23
A5SS	novel_NIR_33712	chr9	97587102	97591291	+	97569037	97591291	ENST00000395211.6	novel	0.6	3	2	3	2	y	0.29	2	5	2	5	y	0.5	2	2	2	2	y	0	0	6	0	6	n	0	0	4	0	4	n	0	0	8	0	8	n	0.0367408	-5.07218	down	ENSG00000136842.13
A5SS	novel_NIR_34395	chrX	47222342	47223552	+	47218664	47223552	ENST00000457458.6	novel	0.65	11	6	11	6	n	0.67	14	7	14	7	y	0.76	13	4	13	4	n	0.5	8	8	8	8	n	0.44	8	10	8	10	y	0.58	11	8	11	8	y	0.0254203	-3.53469	down	ENSG00000102225.15
A5SS	known_NIR_44	chr1	109671583	109674747	+	109659110	109674747	ENST00000336075.6	known	0.03	43	1264	43	1264	y	0.04	34	933	34	933	y	0.04	43	1075	43	1075	y	0.06	48	760	48	760	y	0.09	77	782	77	782	y	0.07	65	869	65	869	y	0.0398716	3.88909	up	ENSG00000168765.15
A5SS	known_NIR_378	chr1	151346333	151346489	-	151346333	151346482	ENST00000290524.8	known	0.72	34	13	34	13	y	0.76	16	5	16	5	y	0.81	30	7	30	7	y	0.87	27	4	27	4	y	0.86	18	3	18	3	y	0.89	16	2	16	2	y	0.0403023	4.00184	up	ENSG00000143390.17
A5SS	known_NIR_586	chr1	156242295	156242553	+	156236483	156242553	ENST00000490491.5	known	0	0	11	0	11	n	0	0	11	0	11	n	0	0	43	0	43	n	0.14	4	24	4	24	y	0.16	5	27	5	27	y	0.1	3	26	3	26	y	0.0170536	7.55929	up	ENSG00000260238.5
A5SS	known_NIR_710	chr1	165768269	165768759	-	165768269	165768682	ENST00000612311.4	known	0.08	42	510	42	510	y	0.11	55	451	55	451	y	0.08	64	772	64	772	y	0.15	97	539	97	539	y	0.12	66	470	66	470	y	0.12	67	505	67	505	y	0.0474207	2.82843	up	ENSG00000143183.16
A5SS	known_NIR_723	chr1	168104894	168134906	-	168104894	168137390	ENST00000271357.9	known	0.6	6	4	6	4	y	0.5	5	5	5	5	y	0.71	5	2	5	2	n	1	5	0	5	0	n	-	-	-	-	-	-	1	1	0	1	0	n	0.0225852	6.54083	up	ENSG00000143147.14
A5SS	known_NIR_1403	chr1	45608337	45613169	+	45606591	45613169	ENST00000372052.8	known	0.34	225	437	225	437	y	0.31	142	322	142	322	y	0.32	301	639	301	639	y	0.38	221	367	221	367	y	0.37	203	345	203	345	y	0.38	263	432	263	432	y	0.0165506	5.65685	up	ENSG00000132780.16
A5SS	known_NIR_1715	chr10	13109015	13109112	+	13100302	13109112	ENST00000378757.6	known	0.06	5	76	5	76	y	0.05	2	35	2	35	y	0.1	10	87	10	87	y	0.11	8	66	8	66	y	0.15	11	62	11	62	y	0.12	10	72	10	72	y	0.0463885	2.91548	up	ENSG00000123240.16
A5SS	known_NIR_1730	chr10	13496888	13499739	-	13496888	13499778	ENST00000341083.7	known	0.25	2	6	2	6	n	0.45	5	6	5	6	y	0.4	4	6	4	6	y	0.71	10	4	10	4	y	-	-	-	-	-	-	0.67	6	3	6	3	n	0.0243049	5.10526	up	ENSG00000165626.16
A5SS	known_NIR_1959	chr10	79804527	79806039	-	79804527	79814613	ENST00000619625.4	known	0.79	64	17	64	17	y	0.74	76	27	76	27	y	0.7	69	29	69	29	y	0.88	93	13	93	13	y	0.95	76	4	76	4	y	0.82	75	16	75	16	y	0.0437738	3.06316	up	ENSG00000225484.6
A5SS	known_NIR_2321	chr11	3808651	3823883	+	3808315	3823883	ENST00000396993.8	known	0.38	5	8	5	8	y	0.29	2	5	2	5	n	0.5	8	8	8	8	y	0.8	8	2	8	2	y	0.77	10	3	10	3	y	0.6	6	4	6	4	y	0.0186499	3.8292	up	ENSG00000148985.19
A5SS	known_NIR_2535	chr11	62705617	62705916	-	62705617	62707109	ENST00000405837.5	known	0.18	9	40	9	40	y	0.07	3	41	3	41	y	0.21	12	46	12	46	y	0.33	34	70	34	70	y	0.36	18	32	18	32	y	0.25	18	55	18	55	y	0.0442165	2.97683	up	ENSG00000168000.14
A5SS	known_NIR_2804	chr11	67607049	67608396	+	67607076	67608396	ENST00000322776.10	known	0.02	10	448	10	448	y	0.02	11	488	11	488	y	0.01	8	726	8	726	y	0.03	16	555	16	555	y	0.04	21	558	21	558	y	0.03	20	593	20	593	y	0.0241101	3.53553	up	ENSG00000167792.11
A5SS	known_NIR_2884	chr11	72759381	72781062	-	72759381	72780975	ENST00000543304.5	known	0.02	5	297	5	297	y	0.03	12	356	12	356	y	0.03	12	462	12	462	y	0.06	23	332	23	332	y	0.06	25	363	25	363	y	0.04	15	395	15	395	y	0.038561	3.57771	up	ENSG00000214530.7
A5SS	known_NIR_3060	chr11	94492906	94493684	-	94492906	94493791	ENST00000323929.7	known	0.78	14	4	14	4	y	0.82	9	2	9	2	y	0.67	8	4	8	4	y	1	12	0	12	0	n	1	3	0	3	0	n	1	6	0	6	0	n	0.0323271	5.42605	up	ENSG00000020922.12
A5SS	known_NIR_3501	chr12	51048478	51049034	+	51048371	51049034	ENST00000550929.5	known	0.92	47	4	47	4	y	0.93	13	1	13	1	n	0.9	43	5	43	5	y	1	36	0	36	0	n	1	49	0	49	0	n	1	35	0	35	0	n	0.0110153	9.44911	up	ENSG00000050426.15
A5SS	known_NIR_3726	chr12	63780462	63781019	+	63780129	63781019	ENST00000261234.10	known	0.06	3	47	3	47	y	0.09	4	39	4	39	y	0.13	7	48	7	48	y	0.26	12	35	12	35	y	0.19	11	48	11	48	y	0.21	17	63	17	63	y	0.012091	4.3589	up	ENSG00000118600.11
A5SS	known_NIR_3883	chr12	93571914	93572685	+	93571216	93572685	ENST00000536696.6	known	0.58	42	31	42	31	y	0.66	27	14	27	14	y	0.68	117	54	117	54	y	0.81	56	13	56	13	y	0.72	63	25	63	25	y	0.81	52	12	52	12	y	0.0308129	3.2697	up	ENSG00000120833.13
A5SS	known_NIR_3980	chr13	32522270	32527408	-	32522270	32527458	ENST00000357505.10	known	0.86	255	40	255	40	y	0.85	245	44	245	44	y	0.86	337	53	337	53	y	0.89	220	26	220	26	y	0.9	209	24	209	24	y	0.89	254	33	254	33	y	0.00147312	7.77817	up	ENSG00000244754.8
A5SS	known_NIR_4298	chr14	23557034	23558695	+	23557039	23558695	ENST00000556015.5	known	0.43	13	17	13	17	y	0.32	7	15	7	15	y	0.35	13	24	13	24	y	0.5	13	13	13	13	y	0.6	12	8	12	8	y	0.67	18	9	18	9	y	0.0251807	3.76904	up	ENSG00000259431.5
A5SS	known_NIR_4344	chr14	24232977	24233219	+	24232788	24233219	ENST00000620807.4	known	0.16	10	53	10	53	y	0.31	22	48	22	48	y	0.32	39	82	39	82	y	0.44	38	48	38	48	y	0.59	46	32	46	32	y	0.45	59	72	59	72	y	0.0317112	3.24549	up	ENSG00000100938.17
A5SS	known_NIR_4699	chr14	91473370	91475811	-	91473370	91475850	ENST00000554684.5	known	0.39	30	46	30	46	y	0.28	7	18	7	18	y	0.35	29	53	29	53	y	0.46	25	29	25	29	y	0.46	16	19	16	19	y	0.53	24	21	24	21	y	0.0263819	3.60848	up	ENSG00000100796.17
A5SS	known_NIR_5011	chr15	72219110	72230896	-	72219110	72231116	ENST00000389093.7	known	0.04	63	1626	63	1626	y	0.04	69	1572	69	1572	y	0.03	103	2945	103	2945	y	0.05	128	2294	128	2294	y	0.06	140	2222	140	2222	y	0.07	174	2356	174	2356	y	0.0356527	3.5	up	ENSG00000067225.17
A5SS	known_NIR_5256	chr16	1312558	1314020	+	1312603	1314020	ENST00000397515.6	known	0.25	14	42	14	42	y	0.32	19	41	19	41	y	0.29	38	91	38	91	y	0.37	26	45	26	45	y	0.42	37	51	37	51	y	0.38	20	33	20	33	y	0.0176264	4.0705	up	ENSG00000103275.18
A5SS	known_NIR_5450	chr16	29455235	29455398	+	29454930	29455398	ENST00000330181.9	known	0	0	286	0	286	n	0	1	420	1	420	n	0.01	6	577	6	577	y	0.03	10	359	10	359	y	0.02	10	427	10	427	y	0.02	6	350	6	350	y	0.0132356	4.24264	up	ENSG00000181625.17
A5SS	known_NIR_6085	chr17	16058599	16061758	-	16058599	16061401	ENST00000268712.7	known	0	0	47	0	47	n	0	0	46	0	46	n	0	0	101	0	101	n	0.03	2	57	2	57	y	0.07	3	43	3	43	y	0.06	2	34	2	34	y	0.0472139	4.4376	up	ENSG00000141027.20
A5SS	known_NIR_6290	chr17	36535601	36537094	+	36535592	36537094	ENST00000614443.1	known	0.12	2	15	2	15	y	0	0	6	0	6	n	0.14	3	19	3	19	y	0.33	5	10	5	10	y	0.25	3	9	3	9	y	0.23	3	10	3	10	y	0.0314285	3.4375	up	ENSG00000277161.1
A5SS	known_NIR_6312	chr17	38137003	38137985	+	38013061	38137985	ENST00000618737.2	known	0	0	22	0	22	n	0	0	25	0	25	n	0	0	61	0	61	n	0.06	3	47	3	47	y	0.07	4	51	4	51	y	0.1	3	26	3	26	y	0.0237044	6.37905	up	ENSG00000274419.4
A5SS	known_NIR_6744	chr17	7308113	7309615	+	7307115	7309615	ENST00000336452.11	known	0.94	464	31	464	31	y	0.91	576	54	576	54	y	0.93	834	61	834	61	y	0.97	552	19	552	19	y	0.95	630	30	630	30	y	0.97	720	25	720	25	y	0.032811	3.31662	up	ENSG00000132507.17
A5SS	known_NIR_6859	chr17	75851676	75855180	-	75851676	75855239	ENST00000254806.7	known	0	0	244	0	244	n	0.01	2	255	2	255	y	0.01	4	313	4	313	y	0.03	7	249	7	249	y	0.04	12	278	12	278	y	0.04	13	302	13	302	y	0.00312559	6.36396	up	ENSG00000132471.11
A5SS	known_NIR_6966	chr17	7948619	7949085	+	7948685	7949085	ENST00000380262.7	known	0.84	57	11	57	11	y	0.87	83	12	83	12	y	0.89	104	13	104	13	y	0.92	65	6	65	6	y	0.93	112	9	112	9	y	0.97	118	4	118	4	y	0.0254888	3.47851	up	ENSG00000170037.13
A5SS	known_NIR_7191	chr18	35480563	35487386	-	35480563	35497719	ENST00000592173.5	known	0.19	21	88	21	88	y	0.18	28	126	28	126	y	0.19	32	139	32	139	y	0.29	24	58	24	58	y	0.33	30	60	30	60	y	0.28	31	80	31	80	y	0.0143728	7.24882	up	ENSG00000153391.15
A5SS	known_NIR_8024	chr19	42926716	42929442	-	42926716	43075354	ENST00000618424.4	known	0.78	21	6	21	6	y	0.58	22	16	22	16	y	0.67	10	5	10	5	y	1	12	0	12	0	n	0.86	18	3	18	3	y	0.88	14	2	14	2	y	0.0343651	3.26458	up	ENSG00000221878.10
A5SS	known_NIR_8045	chr19	43596743	43597097	+	43596585	43597097	ENST00000533118.5	known	0.82	28	6	28	6	y	0.81	42	10	42	10	y	0.84	43	8	43	8	y	0.92	22	2	22	2	y	0.96	25	1	25	1	n	0.89	39	5	39	5	y	0.0246607	4.52267	up	ENSG00000124444.15
A5SS	known_NIR_8158	chr19	46784559	46787239	-	46784559	46787400	ENST00000542575.6	known	0.01	22	1503	22	1503	y	0.02	32	1411	32	1411	y	0.02	47	2109	47	2109	y	0.04	64	1410	64	1410	y	0.04	57	1480	57	1480	y	0.03	48	1549	48	1549	y	0.0132356	4.24264	up	ENSG00000105281.12
A5SS	known_NIR_8175	chr19	47228446	47230929	-	47228446	47232515	ENST00000449228.5	known	0.22	22	77	22	77	y	0.19	21	91	21	91	y	0.22	47	162	47	162	y	0.34	49	97	49	97	y	0.31	49	107	49	107	y	0.37	52	89	52	89	y	0.0060506	6.5	up	ENSG00000105327.15
A5SS	known_NIR_8245	chr19	49459848	49460822	+	49453421	49460822	ENST00000540132.5	known	0.93	136	11	136	11	y	0.96	145	6	145	6	y	0.95	208	12	208	12	y	0.97	120	4	120	4	y	1	119	0	119	0	n	0.98	189	4	189	4	y	0.0423945	2.93987	up	ENSG00000161618.9
A5SS	known_NIR_8960	chr2	202556531	202559696	+	202552888	202559696	ENST00000374574.2	known	0.93	103	8	103	8	y	0.93	103	8	103	8	y	0.92	131	11	131	11	y	0.96	92	4	92	4	y	0.95	102	5	102	5	y	0.95	105	5	105	5	y	0.00481268	5.65685	up	ENSG00000204217.12
A5SS	known_NIR_9192	chr2	241315982	241324216	+	241315610	241324216	ENST00000391973.6	known	0.71	59	24	59	24	y	0.74	29	10	29	10	y	0.76	91	29	91	29	y	0.82	96	21	96	21	y	0.87	58	9	58	9	y	0.85	88	16	88	16	y	0.0058726	5.35331	up	ENSG00000168385.17
A5SS	known_NIR_9274	chr2	27657669	27662179	-	27657669	27660984	ENST00000406540.5	known	0	0	106	0	106	n	0	0	101	0	101	n	0	0	183	0	183	n	0.02	2	120	2	120	y	0.04	6	151	6	151	y	0.04	5	130	5	130	y	0.0377496	5	up	ENSG00000119760.15
A5SS	known_NIR_9518	chr2	9418732	9422479	-	9418732	9423373	ENST00000238091.8	known	0.1	42	376	42	376	y	0.07	33	429	33	429	y	0.09	61	653	61	653	y	0.14	69	412	69	412	y	0.16	62	333	62	333	y	0.14	80	484	80	484	y	0.00685323	5.4272	up	ENSG00000119185.12
A5SS	known_NIR_9701	chr20	35699456	35699633	+	35699451	35699633	ENST00000374078.5	known	0.67	1226	610	1226	610	y	0.66	1628	843	1628	843	y	0.67	2144	1056	2144	1056	y	0.69	1664	737	1664	737	y	0.68	1635	772	1635	772	y	0.68	1826	872	1826	872	y	0.0241101	3.53553	up	ENSG00000125995.15
A5SS	known_NIR_10144	chr21	44330326	44330463	-	44330326	44330823	ENST00000339818.8	known	0	0	37	0	37	n	0	0	58	0	58	n	0	0	71	0	71	n	0.06	3	50	3	50	y	0.05	3	54	3	54	y	0.1	7	64	7	64	y	0.0444669	4.58258	up	ENSG00000160226.15
A5SS	known_NIR_10315	chr22	23638942	23640308	-	23638942	23659865	ENST00000455485.5	known	0.12	1	7	1	7	n	0.4	4	6	4	6	y	0.42	8	11	8	11	y	0.57	8	6	8	6	y	0.83	15	3	15	3	y	0.72	13	5	13	5	y	0.0355668	3.20562	up	ENSG00000228315.11
A5SS	known_NIR_10620	chr3	100709431	100713643	+	100709721	100713643	ENST00000620299.4	known	0.01	1	123	1	123	n	0.03	3	89	3	89	y	0.04	7	167	7	167	y	0.09	11	112	11	112	y	0.12	20	152	20	152	y	0.1	20	176	20	176	y	0.0035523	6.14701	up	ENSG00000114354.12
A5SS	known_NIR_10775	chr3	134482931	134485952	-	134482931	134485320	ENST00000510994.5	known	0.52	60	55	60	55	y	0.58	62	45	62	45	y	0.51	71	67	71	67	y	0.63	75	44	75	44	y	0.71	67	28	67	28	y	0.66	75	38	75	38	y	0.0154038	4.06603	up	ENSG00000129055.12
A5SS	known_NIR_10780	chr3	134559429	134561377	+	134552012	134561377	ENST00000332047.9	known	0	0	30	0	30	n	0.01	1	66	1	66	n	0.02	1	60	1	60	n	0.04	1	27	1	27	n	0.04	2	44	2	44	y	0.03	1	39	1	39	n	0.0248175	4	up	ENSG00000182923.16
A5SS	known_NIR_10998	chr3	196939432	196941935	-	196939432	196942160	ENST00000447325.5	known	0.71	15	6	15	6	y	0.48	10	11	10	11	y	0.48	11	12	11	12	y	0.84	16	3	16	3	y	0.77	10	3	10	3	y	1	9	0	9	0	n	0.0384972	3.0562	up	ENSG00000114503.10
A5SS	known_NIR_11061	chr3	37065942	37066224	-	37065942	37075024	ENST00000354379.8	known	0	0	62	0	62	n	0.05	3	52	3	52	y	0.05	3	61	3	61	y	0.12	7	50	7	50	y	0.19	13	56	13	56	y	0.1	9	82	9	82	y	0.0418694	3.23197	up	ENSG00000093167.17
A5SS	known_NIR_11147	chr3	48298523	48300431	-	48298523	48301296	ENST00000421967.5	known	0	0	27	0	27	n	0.13	5	33	5	33	y	0.14	4	25	4	25	y	0.34	22	42	22	42	y	0.2	5	20	5	20	y	0.33	14	29	14	29	y	0.0349739	3.13625	up	ENSG00000172113.8
A5SS	known_NIR_11436	chr4	102826636	102827592	-	102826636	102827427	ENST00000453744.6	known	0.35	167	314	167	314	y	0.36	185	323	185	323	y	0.36	282	495	282	495	y	0.4	239	353	239	353	y	0.38	193	310	193	310	y	0.38	224	372	224	372	y	0.0285958	4.02492	up	ENSG00000109332.19
A5SS	known_NIR_11439	chr4	102826636	102827735	-	102826636	102827592	ENST00000394801.8	known	0.05	8	167	8	167	y	0.05	9	185	9	185	y	0.06	17	282	17	282	y	0.09	25	239	25	239	y	0.08	17	193	17	193	y	0.07	16	224	16	224	y	0.0248175	4	up	ENSG00000109332.19
A5SS	known_NIR_11505	chr4	139073567	139084133	-	139073567	139125164	ENST00000394235.6	known	0.67	4	2	4	2	n	0.5	7	7	7	7	y	0.69	18	8	18	8	y	0.86	6	1	6	1	n	1	6	0	6	0	n	1	8	0	8	0	n	0.0136562	4.37269	up	ENSG00000109381.19
A5SS	known_NIR_11616	chr4	25405622	25406829	+	25405619	25406829	ENST00000315368.7	known	0.11	4	32	4	32	y	0.12	2	15	2	15	y	0.1	4	35	4	35	y	0.24	7	22	7	22	y	0.23	6	20	6	20	y	0.24	11	34	11	34	y	0.000212427	19	up	ENSG00000053900.10
A5SS	known_NIR_11627	chr4	2747945	2756014	-	2747945	2755949	ENST00000510267.5	known	0.9	63	7	63	7	y	0.88	59	8	59	8	y	0.93	102	8	102	8	y	0.94	101	7	101	7	y	1	80	0	80	0	n	1	78	0	78	0	n	0.040908	3.10132	up	ENSG00000168884.14
A5SS	known_NIR_12080	chr5	172959514	172959865	+	172958801	172959865	ENST00000519974.5	known	0.57	12	9	12	9	y	0.61	20	13	20	13	y	0.77	17	5	17	5	y	1	23	0	23	0	n	1	25	0	25	0	n	0.79	27	7	27	7	y	0.0403433	3.01348	up	ENSG00000037241.7
A5SS	known_NIR_12220	chr5	32586501	32588512	+	32571174	32588512	ENST00000512913.5	known	0.15	5	29	5	29	y	0.3	6	14	6	14	y	0.25	9	27	9	27	y	0.64	7	4	7	4	y	0.53	8	7	8	7	y	0.62	18	11	18	11	y	0.00353766	6.53739	up	ENSG00000113387.11
A5SS	known_NIR_12308	chr5	69560403	69565100	+	69560242	69565100	ENST00000512736.5	known	0.66	39	20	39	20	y	0.68	23	11	23	11	y	0.69	36	16	36	16	y	0.89	31	4	31	4	y	0.77	30	9	30	9	y	0.88	23	3	23	3	y	0.0415937	4.31029	up	ENSG00000183474.15
A5SS	known_NIR_12322	chr5	70415550	70420249	+	70415389	70420249	ENST00000508065.7	known	0.64	32	18	32	18	y	0.57	17	13	17	13	y	0.63	33	19	33	19	y	0.88	29	4	29	4	y	0.73	24	9	24	9	y	0.86	18	3	18	3	y	0.0303317	4.04979	up	ENSG00000226259.10
A5SS	known_NIR_12697	chr6	30884710	30888688	+	30882983	30888688	ENST00000418800.6	known	0.13	2	13	2	13	y	0	0	4	0	4	n	0.2	2	8	2	8	y	0.33	4	8	4	8	y	0.67	6	3	6	3	n	0.54	7	6	7	6	y	0.0347101	3.50467	up	ENSG00000204580.11
A5SS	known_NIR_13043	chr7	100101968	100102675	+	100101989	100102675	ENST00000429084.5	known	0.92	46	4	46	4	y	0.86	32	5	32	5	y	0.85	55	10	55	10	y	0.95	38	2	38	2	y	1	43	0	43	0	n	1	49	0	49	0	n	0.0202533	3.88057	up	ENSG00000221838.9
A5SS	known_NIR_13883	chr8	144105149	144105640	+	144104858	144105640	ENST00000322428.9	known	0.03	10	297	10	297	y	0.05	19	341	19	341	y	0.06	29	452	29	452	y	0.1	34	317	34	317	y	0.09	33	338	33	338	y	0.09	40	390	40	390	y	0.0227763	4.94975	up	ENSG00000179632.9
A5SS	known_NIR_14202	chr9	112276013	112297832	-	112276013	112297841	ENST00000458258.5	known	0.31	4	9	4	9	y	0.25	3	9	3	9	y	0.25	1	3	1	3	n	0.86	12	2	12	2	y	0.74	20	7	20	7	y	0.67	4	2	4	2	n	0.00699397	8.25241	up	ENSG00000119314.15
A5SS	known_NIR_14232	chr9	121286185	121301963	+	121282550	121301963	ENST00000449733.5	known	-	-	-	-	-	-	0	0	21	0	21	n	0.07	2	25	2	25	y	0.55	26	21	26	21	y	0.5	3	3	3	3	n	0.36	4	7	4	7	y	0.00769912	6.51483	up	ENSG00000148180.16
A5SS	known_NIR_14522	chr9	37588932	37592291	-	37588932	37592310	ENST00000537239.2	known	0.35	34	63	34	63	y	0.31	25	55	25	55	y	0.4	51	77	51	77	y	0.52	67	62	67	62	y	0.43	42	56	42	56	y	0.47	60	67	60	67	y	0.0311017	3.25929	up	ENSG00000256966.6
A5SS	known_NIR_14664	chrX	110004164	110067347	+	110002772	110067347	ENST00000372072.7	known	0.82	9	2	9	2	y	0.78	7	2	7	2	n	0.89	17	2	17	2	y	1	17	0	17	0	n	1	10	0	10	0	n	1	9	0	9	0	n	0.0339454	5.28845	up	ENSG00000157600.11
A5SS	known_NIR_14667	chrX	11111423	11112019	+	11111460	11112019	ENST00000321143.8	known	0	0	7	0	7	n	0	0	6	0	6	n	0	0	18	0	18	n	0.18	2	9	2	9	y	0.24	5	16	5	16	y	0.19	4	17	4	17	y	0.00822841	10.9559	up	ENSG00000004961.14
A5SS	novel_NIR_995	chr1	15764547	15764964	+	15764685	15764964	ENST00000375771.5	novel	0.11	8	65	8	65	n	0.07	5	68	5	68	n	0.14	16	97	16	97	n	0.17	17	81	17	81	y	0.2	22	87	22	87	y	0.18	15	67	15	67	y	0.0467309	3.46738	up	ENSG00000162458.12
A5SS	novel_NIR_1199	chr1	168104894	168133876	-	168104894	168137390	ENST00000271357.9	novel	0	0	4	0	4	n	0	0	5	0	5	n	0.33	1	2	1	2	n	1	2	0	2	0	y	-	-	-	-	-	-	1	2	0	2	0	y	0.0149345	8.09091	up	ENSG00000143147.14
A5SS	novel_NIR_1484	chr1	200893845	200898307	+	200891701	200898307	ENST00000367342.8	novel	0	0	25	0	25	n	0	0	4	0	4	n	0	0	14	0	14	n	0.15	2	11	2	11	y	0.18	2	9	2	9	y	0.11	2	17	2	17	n	0.0185806	7.23356	up	ENSG00000163362.10
A5SS	novel_NIR_1492	chr1	201151852	201153783	-	201151852	201153849	ENST00000367332.5	novel	0	0	45	0	45	n	0	0	29	0	29	n	0.04	2	53	2	53	n	0.12	4	29	4	29	n	0.16	9	48	9	48	y	0.14	5	32	5	32	n	0.00215026	7.18132	up	ENSG00000116857.16
A5SS	novel_NIR_2693	chr1	43979616	43981109	+	43979511	43981109	ENST00000372324.5	novel	0.15	7	40	7	40	y	0.03	1	29	1	29	n	0.16	7	38	7	38	y	0.2	11	45	11	45	y	0.3	11	26	11	26	y	0.33	18	36	18	36	y	0.0466878	2.84807	up	ENSG00000117411.16
A5SS	novel_NIR_3397	chr10	100262063	100267002	-	100262063	100267571	ENST00000354105.8	novel	0	0	24	0	24	n	0.13	2	13	2	13	n	0	0	15	0	15	n	0.17	4	19	4	19	y	0.21	4	15	4	15	y	0.24	4	13	4	13	y	0.0457715	3.41399	up	ENSG00000095485.16
A5SS	novel_NIR_3852	chr10	14878919	14896846	+	14879127	14896846	ENST00000313519.9	novel	0.75	12	4	12	4	y	0.43	3	4	3	4	y	0.5	6	6	6	6	y	1	8	0	8	0	y	1	2	0	2	0	y	1	5	0	5	0	y	0.0454311	4.53023	up	ENSG00000152455.15
A5SS	novel_NIR_5110	chr11	125626642	125626749	+	125626575	125626749	ENST00000534070.5	novel	0.58	7	5	7	5	y	0.38	3	5	3	5	y	0.38	3	5	3	5	y	1	2	0	2	0	y	1	3	0	3	0	y	1	2	0	2	0	y	0.0142073	8.3	up	ENSG00000149554.12
A5SS	novel_NIR_5547	chr11	36597730	36610081	+	36594915	36610081	ENST00000617650.4	novel	0	0	6	0	6	n	0.29	2	5	2	5	y	0.17	6	29	6	29	y	1	2	0	2	0	y	0.58	7	5	7	5	y	1	2	0	2	0	y	0.0189608	4.32653	up	ENSG00000166352.15
A5SS	novel_NIR_5939	chr11	64225869	64226062	-	64225869	64226050	ENST00000541278.5	novel	0.09	10	101	10	101	n	0.05	5	102	5	102	n	0.1	15	128	15	128	n	0.14	13	79	13	79	n	0.15	12	68	12	68	y	0.14	13	81	13	81	n	0.0478908	4.05081	up	ENSG00000149743.13
A5SS	novel_NIR_6135	chr11	66002606	66003235	+	66003070	66003235	ENST00000533166.5	novel	0	0	30	0	30	n	0.03	1	33	1	33	n	0	0	24	0	24	n	0.15	5	29	5	29	y	0.18	6	28	6	28	y	0.3	10	23	10	23	y	0.04322	4.26401	up	ENSG00000175334.7
A5SS	novel_NIR_7025	chr12	111943369	111965595	-	111943369	111991758	ENST00000550831.7	novel	0	0	13	0	13	n	0	0	5	0	5	n	0	0	8	0	8	n	0.12	1	7	1	7	n	0.22	2	7	2	7	y	0.2	2	8	2	8	y	0.0276188	5.89188	up	ENSG00000198270.12
A5SS	novel_NIR_7185	chr12	121899889	121903006	+	121888994	121903006	ENST00000542602.1	novel	0	0	18	0	18	n	0	0	18	0	18	n	0	0	22	0	22	n	0.13	3	20	3	20	n	0.17	5	25	5	25	y	0.09	2	20	2	20	n	0.0301388	5.62917	up	ENSG00000110801.13
A5SS	novel_NIR_7956	chr12	53231235	53231391	-	53231235	53231974	ENST00000394426.5	novel	0	0	12	0	12	n	0	0	11	0	11	n	0	0	19	0	19	n	0.15	2	11	2	11	y	0.08	2	22	2	22	n	0.12	2	14	2	14	n	0.0289011	5.75396	up	ENSG00000172819.16
A5SS	novel_NIR_8703	chr13	110624279	110627439	+	110615647	110627439	ENST00000424185.6	novel	0.56	5	4	5	4	y	0.4	4	6	4	6	y	0.44	12	15	12	15	y	0.91	10	1	10	1	n	1	6	0	6	0	y	1	5	0	5	0	y	0.00192007	8.88235	up	ENSG00000213995.11
A5SS	novel_NIR_9196	chr13	99254954	99314097	+	99238554	99314097	ENST00000376440.6	novel	0	0	6	0	6	n	0	0	11	0	11	n	0	0	4	0	4	n	0.4	2	3	2	3	y	0.29	2	5	2	5	y	0.4	2	3	2	3	y	0.0100313	9.90909	up	ENSG00000134882.15
A5SS	novel_NIR_9604	chr14	23941158	23953574	-	23941158	23953774	ENST00000556379.1	novel	0	0	16	0	16	n	0	0	10	0	10	n	0	0	32	0	32	n	0.24	4	13	4	13	y	0.41	9	13	9	13	y	0.23	8	27	8	27	y	0.0374318	5.02243	up	ENSG00000215256.3
A5SS	novel_NIR_10462	chr14	95533061	95533693	-	95533061	95534035	ENST00000500370.2	novel	0.78	38	11	38	11	y	0.83	38	8	38	8	y	0.75	47	16	47	16	y	0.86	24	4	24	4	y	0.92	24	2	24	2	y	0.92	23	2	23	2	y	0.0219308	3.68782	up	ENSG00000247092.6
A5SS	novel_NIR_10464	chr14	95533061	95534593	-	95533061	95534035	ENST00000500370.2	novel	0.56	14	11	14	11	y	0.75	24	8	24	8	y	0.67	32	16	32	16	y	0.85	23	4	23	4	y	0.93	28	2	28	2	y	0.87	13	2	13	2	y	0.0395904	3.71649	up	ENSG00000247092.6
A5SS	novel_NIR_14019	chr17	41835957	41836079	-	41835957	41836182	ENST00000435506.6	novel	0.14	5	31	5	31	n	0.16	11	57	11	57	y	0.13	11	72	11	72	n	0.33	20	40	20	40	y	0.22	10	35	10	35	y	0.3	16	37	16	37	y	0.0429131	4.11844	up	ENSG00000141698.16
A5SS	novel_NIR_14366	chr17	48107979	48112031	+	48107596	48112031	ENST00000580219.5	novel	0	0	2	0	2	n	-	-	-	-	-	-	0	0	4	0	4	n	1	2	0	2	0	y	0.5	1	1	1	1	n	1	2	0	2	0	y	0.0377496	5	up	ENSG00000002919.14
A5SS	novel_NIR_14497	chr17	5426082	5428071	+	5422829	5428071	ENST00000574003.1	novel	0.57	4	3	4	3	y	0.27	3	8	3	8	y	0.64	7	4	7	4	y	-	-	-	-	-	-	1	3	0	3	0	y	1	2	0	2	0	y	0.0466799	4.4648	up	ENSG00000129197.14
A5SS	novel_NIR_14870	chr17	7308133	7309615	+	7307115	7309615	ENST00000336452.11	novel	0.45	25	31	25	31	y	0.33	27	54	27	54	y	0.46	53	61	53	61	y	0.64	34	19	34	19	y	0.65	55	30	55	30	y	0.52	27	25	27	25	y	0.032382	3.2167	up	ENSG00000132507.17
A5SS	novel_NIR_15018	chr17	75809039	75809760	+	75784984	75809760	ENST00000589666.5	novel	0	0	6	0	6	n	0	0	11	0	11	n	0	0	8	0	8	n	0.36	5	9	5	9	y	0.5	6	6	6	6	n	0.25	1	3	1	3	n	0.0361663	5.11461	up	ENSG00000132478.9
A5SS	novel_NIR_15902	chr18	79977701	79988264	-	79977701	80030521	ENST00000592957.1	novel	0.29	2	5	2	5	y	0.46	6	7	6	7	y	0.5	2	2	2	2	y	0.7	7	3	7	3	y	1	3	0	3	0	y	1	5	0	5	0	y	0.0209384	4.064	up	ENSG00000141759.14
A5SS	novel_NIR_15989	chr19	11345415	11345559	-	11345415	11346127	ENST00000586218.5	novel	0.29	2	5	2	5	y	0.33	4	8	4	8	y	0.27	3	8	3	8	y	0.61	11	7	11	7	y	0.44	8	10	8	10	y	0.5	15	15	15	15	y	0.0357603	4.16588	up	ENSG00000105518.13
A5SS	novel_NIR_16199	chr19	15125069	15125380	-	15125069	15125656	ENST00000263383.7	novel	0.05	1	19	1	19	n	0	0	12	0	12	n	0.03	1	29	1	29	n	0.17	4	19	4	19	y	0.18	3	14	3	14	y	0.18	3	14	3	14	y	0.00689824	10.0623	up	ENSG00000105135.15
A5SS	novel_NIR_16932	chr19	38309643	38315425	-	38309643	38315747	ENST00000591784.5	novel	0.07	1	13	1	13	n	0.13	4	27	4	27	n	0.12	8	57	8	57	n	0.23	5	17	5	17	y	0.33	12	24	12	24	y	0.27	13	35	13	35	y	0.0118513	4.93036	up	ENSG00000167645.16
A5SS	novel_NIR_17372	chr19	45713573	45723473	-	45713573	45730849	ENST00000317683.3	novel	0	0	3	0	3	n	0.17	1	5	1	5	n	0	0	13	0	13	n	0.24	5	16	5	16	y	0.29	2	5	2	5	y	0.31	4	9	4	9	y	0.0454901	3.69946	up	ENSG00000177051.5
A5SS	novel_NIR_17580	chr19	48955519	48955687	+	48954964	48955687	ENST00000391871.4	novel	0	0	5	0	5	n	0	0	11	0	11	n	0.15	2	11	2	11	y	0.29	2	5	2	5	y	0.22	2	7	2	7	y	0.22	2	7	2	7	y	0.0430992	3.50391	up	ENSG00000087088.19
A5SS	novel_NIR_17960	chr19	55342647	55342742	+	55342046	55342742	ENST00000630497.1	novel	0.08	1	11	1	11	n	0	0	11	0	11	n	0	0	14	0	14	n	0.17	2	10	2	10	y	0.22	4	14	4	14	y	0.12	2	15	2	15	n	0.0220619	3.64721	up	ENSG00000133247.13
A5SS	novel_NIR_18104	chr19	57858983	57875137	-	57858983	57888767	ENST00000595295.1	novel	0.22	2	7	2	7	y	0.33	2	4	2	4	n	0	0	2	0	2	n	-	-	-	-	-	-	1	2	0	2	0	n	1	2	0	2	0	n	0.013819	8.4183	up	ENSG00000204514.9
A5SS	novel_NIR_18105	chr19	57858983	57875156	-	57858983	57888767	ENST00000595295.1	novel	0.53	8	7	8	7	y	0.43	3	4	3	4	n	0.5	2	2	2	2	n	-	-	-	-	-	-	1	4	0	4	0	n	1	1	0	1	0	n	0.00331453	17.3264	up	ENSG00000204514.9
A5SS	novel_NIR_18107	chr19	57858983	57876916	-	57858983	57888767	ENST00000595295.1	novel	0	0	7	0	7	n	0.2	1	4	1	4	n	0	0	2	0	2	n	-	-	-	-	-	-	1	8	0	8	0	y	1	3	0	3	0	y	0.00506332	14	up	ENSG00000204514.9
A5SS	novel_NIR_19593	chr2	231710676	231711348	+	231710301	231711348	ENST00000410064.5	novel	0.01	4	550	4	550	n	0	2	573	2	573	n	0	0	971	0	971	n	1	1	0	1	0	n	1	2	0	2	0	y	1	2	0	2	0	y	1.12e-05	299	up	ENSG00000187514.14
A5SS	novel_NIR_19803	chr2	240591000	240591933	+	240591011	240591933	ENST00000391984.6	novel	0	0	19	0	19	n	0.02	1	42	1	42	n	0	0	55	0	55	n	0.14	5	31	5	31	n	0.09	3	30	3	30	n	0.16	6	32	6	32	y	0.019429	5.64245	up	ENSG00000142330.19
A5SS	novel_NIR_20730	chr2	87503624	87521207	+	87472885	87521207	ENST00000419680.6	novel	0	0	10	0	10	n	0.33	3	6	3	6	y	0.11	2	17	2	17	n	1	1	0	1	0	n	1	1	0	1	0	n	-	-	-	-	-	-	0.0126789	8.79626	up	ENSG00000222041.10
A5SS	novel_NIR_21571	chr20	50084254	50096483	-	50084254	50115485	ENST00000415862.6	novel	0	0	16	0	16	n	0.27	4	11	4	11	y	0.28	8	21	8	21	y	1	2	0	2	0	y	1	6	0	6	0	y	1	2	0	2	0	y	0.0123777	8.90468	up	ENSG00000244687.11
A5SS	novel_NIR_21573	chr20	50084254	50113107	-	50084254	50115485	ENST00000415862.6	novel	0.63	27	16	27	16	y	0.61	17	11	17	11	y	0.7	48	21	48	21	y	1	34	0	34	0	y	1	50	0	50	0	y	1	47	0	47	0	y	0.00591017	12.95	up	ENSG00000244687.11
A5SS	novel_NIR_22247	chr21	45160223	45171610	+	45128573	45171610	ENST00000437626.5	novel	0	0	6	0	6	n	0	0	6	0	6	n	0	0	10	0	10	n	-	-	-	-	-	-	0.29	2	5	2	5	y	0.33	2	4	2	4	n	0.0410154	15.5	up	ENSG00000197381.15
A5SS	novel_NIR_23098	chr22	41532157	41532604	-	41532157	41540699	ENST00000337566.9	novel	0.62	8	5	8	5	y	0.69	9	4	9	4	y	0.61	20	13	20	13	y	1	2	0	2	0	y	1	12	0	12	0	y	1	1	0	1	0	n	0.0048513	14.3049	up	ENSG00000100413.16
A5SS	novel_NIR_23475	chr3	114057106	114070626	+	114056864	114070626	ENST00000493014.1	novel	0.33	2	4	2	4	y	0	0	3	0	3	n	0.17	2	10	2	10	y	0.57	4	3	4	3	y	0.67	4	2	4	2	y	-	-	-	-	-	-	0.0274904	4.21313	up	ENSG00000151576.10
A5SS	novel_NIR_23528	chr3	122371800	122372983	-	122371800	122383148	ENST00000479899.5	novel	0	0	33	0	33	n	0	0	23	0	23	n	0.04	2	45	2	45	n	0.17	4	19	4	19	y	0.16	7	37	7	37	y	0.11	4	33	4	33	n	0.00578251	5.8346	up	ENSG00000160124.9
A5SS	novel_NIR_24267	chr3	196939432	196942370	-	196939432	196942160	ENST00000447325.5	novel	0.5	6	6	6	6	y	0.42	8	11	8	11	y	0.57	16	12	16	12	y	0.8	12	3	12	3	y	0.73	8	3	8	3	y	1	11	0	11	0	y	0.0313934	3.77745	up	ENSG00000114503.10
A5SS	novel_NIR_24835	chr3	51672073	51674271	+	51671547	51674271	ENST00000395057.5	novel	0	0	6	0	6	n	-	-	-	-	-	-	0	0	8	0	8	n	-	-	-	-	-	-	0.4	2	3	2	3	y	0.36	5	9	5	9	y	0.0334754	19	up	ENSG00000164081.12
A5SS	novel_NIR_24840	chr3	51672083	51674271	+	51671331	51674271	ENST00000416589.5	novel	0.44	4	5	4	5	y	-	-	-	-	-	-	0.36	4	7	4	7	y	1	1	0	1	0	n	-	-	-	-	-	-	1	2	0	2	0	y	0.0423786	15	up	ENSG00000164081.12
A5SS	novel_NIR_24873	chr3	51995469	51995663	-	51995469	51995769	ENST00000479017.5	novel	0	0	14	0	14	n	0	0	12	0	12	n	0.14	1	6	1	6	n	0.45	5	6	5	6	y	0.2	2	8	2	8	y	0.29	2	5	2	5	y	0.0461113	3.07465	up	ENSG00000162244.10
A5SS	novel_NIR_25933	chr4	41935310	41935467	+	41935262	41935467	ENST00000513702.5	novel	0.23	14	48	14	48	y	0.23	16	53	16	53	y	0.26	23	66	23	66	y	0.34	22	43	22	43	y	0.31	18	40	18	40	y	0.3	22	52	22	52	y	0.00871545	4.90362	up	ENSG00000109133.12
A5SS	novel_NIR_27004	chr5	172958938	172959865	+	172958801	172959865	ENST00000519974.5	novel	0.36	5	9	5	9	y	0	0	13	0	13	n	0	0	5	0	5	n	1	3	0	3	0	y	1	2	0	2	0	y	0.42	5	7	5	7	y	0.0494971	3.01769	up	ENSG00000037241.7
A5SS	novel_NIR_27008	chr5	172959627	172959865	+	172959468	172959865	ENST00000265100.6	novel	0.03	4	116	4	116	n	0.04	4	100	4	100	n	0.07	15	190	15	190	n	0.15	21	117	21	117	y	0.1	13	117	13	117	n	0.09	16	158	16	158	n	0.0480342	3.01511	up	ENSG00000037241.7
A5SS	novel_NIR_27263	chr5	304221	311293	+	272772	311293	ENST00000618970.4	novel	0.2	10	41	10	41	y	0.15	6	33	6	33	y	0.2	9	37	9	37	y	0.27	20	55	20	55	y	0.25	9	27	9	27	y	0.31	20	45	20	45	y	0.0184736	3.8461	up	ENSG00000249915.7
A5SS	novel_NIR_28652	chr6	3004259	3004495	+	3000085	3004495	ENST00000380441.5	novel	0.2	2	8	2	8	y	0.22	2	7	2	7	y	0.31	8	18	8	18	y	0.56	5	4	5	4	y	0.5	1	1	1	1	n	0.6	6	4	6	4	y	0.00244476	6.95115	up	ENSG00000124588.19
A5SS	novel_NIR_28653	chr6	3004259	3004495	+	3003789	3004495	ENST00000338130.6	novel	0.22	2	7	2	7	y	0.33	2	4	2	4	y	0.42	8	11	8	11	y	0.71	5	2	5	2	y	1	1	0	1	0	n	0.75	6	2	6	2	y	0.0145173	4.61586	up	ENSG00000124588.19
A5SS	novel_NIR_29805	chr7	134986983	134987889	+	134986701	134987889	ENST00000435976.6	novel	0.17	2	10	2	10	y	0	0	9	0	9	n	0.04	1	26	1	26	n	0.29	7	17	7	17	y	0.37	7	12	7	12	y	0.41	7	10	7	10	y	0.0132562	4.60347	up	ENSG00000146856.14
A5SS	novel_NIR_29951	chr7	144362853	144366355	+	144365823	144366355	ENST00000056217.9	novel	0.07	2	26	2	26	n	0	0	31	0	31	n	0	0	19	0	19	n	0.12	3	22	3	22	n	0.16	5	27	5	27	y	0.08	2	22	2	22	n	0.042205	2.9445	up	ENSG00000050327.14
A5SS	novel_NIR_30072	chr7	152144881	152145165	-	152144881	152145153	ENST00000262189.10	novel	0	0	4	0	4	n	0.14	1	6	1	6	n	0	0	6	0	6	n	0.5	4	4	4	4	y	0.29	2	5	2	5	y	0.47	7	8	7	8	y	0.0123938	4.63857	up	ENSG00000055609.17
A5SS	novel_NIR_30283	chr7	29121071	29146294	-	29121071	29146341	ENST00000396276.7	novel	0.43	10	13	10	13	y	0.43	18	24	18	24	y	0.49	25	26	25	26	y	0.58	15	11	15	11	y	0.64	7	4	7	4	y	0.58	15	11	15	11	y	0.00607361	5.3033	up	ENSG00000106066.13
A5SS	novel_NIR_32869	chr9	131525977	131526952	-	131525977	131529128	ENST00000372208.7	novel	0.25	2	6	2	6	y	0	0	8	0	8	n	0	0	6	0	6	n	0.75	3	1	3	1	y	0.5	3	3	3	3	y	0.4	2	3	2	3	y	0.0268592	3.5	up	ENSG00000130717.12
A5SS	novel_NIR_32934	chr9	136108819	136108975	-	136108819	136109365	ENST00000563018.1	novel	0	0	2	0	2	n	-	-	-	-	-	-	0	0	4	0	4	n	1	3	0	3	0	y	0.96	24	1	24	1	y	-	-	-	-	-	-	0.0129904	49	up	ENSG00000260193.1
A5SS	novel_NIR_33606	chr9	93450599	93450742	-	93450599	93452147	ENST00000375412.9	novel	0	0	13	0	13	n	0	0	5	0	5	n	0.11	2	17	2	17	n	0.29	4	10	4	10	y	0.4	4	6	4	6	y	0.25	2	6	2	6	y	0.00968139	4.77611	up	ENSG00000188938.15
A5SS&ES	known_NIR_1549	chr1	94820723	94824493	+	94821056	94824493	ENST00000271227.10	known	0.19	6	25	6	25	y	0.12	2	15	2	15	y	0.17	5	24	5	24	y	0.04	2	47	2	47	y	0.06	2	30	2	30	y	0	0	27	0	27	n	0.0103523	-4.64244	down	ENSG00000143036.16
A5SS&ES	known_NIR_1737	chr10	14879127	14896846	+	14881645	14896846	ENST00000378325.7	known	0.25	4	12	4	12	y	0.27	4	11	4	11	y	0.29	6	15	6	15	y	0	0	17	0	17	n	0	0	13	0	13	n	0	0	11	0	11	n	0.00182399	-23.3827	down	ENSG00000152455.15
A5SS&ES	known_NIR_6412	chr17	42838205	42838945	+	42838799	42838945	ENST00000622892.4	known	0.04	29	636	29	636	y	0.05	30	570	30	570	y	0.04	38	874	38	874	y	0.02	15	658	15	658	y	0.03	22	718	22	718	y	0.01	10	717	10	717	y	0.0356527	-3.5	down	ENSG00000131467.10
A5SS&ES	known_NIR_7042	chr17	81892106	81893552	+	81893187	81893552	ENST00000578550.5	known	0.84	64	12	64	12	y	0.87	111	16	111	16	y	0.81	164	38	164	38	y	0.7	124	53	124	53	y	0.72	102	40	102	40	y	0.79	93	24	93	24	y	0.0417165	-3.19741	down	ENSG00000141552.17
A5SS&ES	known_NIR_7945	chr19	40365585	40366419	+	40365930	40366419	ENST00000409735.8	known	0.4	36	55	36	55	y	0.42	35	49	35	49	y	0.35	48	88	48	88	y	0.26	34	99	34	99	y	0.24	31	96	31	96	y	0.28	32	82	32	82	y	0.0108439	-5.46109	down	ENSG00000105223.18
A5SS&ES	novel_NIR_1201	chr1	168104894	168136010	-	168104894	168114456	ENST00000367838.5	novel	0.22	2	7	2	7	y	0.19	4	17	4	17	y	0.11	3	25	3	25	n	0	0	15	0	15	n	0	0	15	0	15	n	0	0	2	0	2	n	0.0340511	-5.2798	down	ENSG00000143147.14
A5SS&ES	novel_NIR_1202	chr1	168104894	168136010	-	168104894	168134906	ENST00000537209.5	novel	0.25	2	6	2	6	y	0.44	4	5	4	5	y	0.38	3	5	3	5	y	0	0	5	0	5	n	-	-	-	-	-	-	0	0	1	0	1	n	0.023838	-6.36049	down	ENSG00000143147.14
A5SS&ES	novel_NIR_23728	chr3	136846586	136861615	-	136846586	136858518	ENST00000474250.5	novel	0.75	6	2	6	2	y	1	1	0	1	0	n	0.67	4	2	4	2	y	0.25	1	3	1	3	n	0	0	2	0	2	n	0	0	5	0	5	n	0.00553461	-5.57695	down	ENSG00000239213.5
A5SS&ES	novel_NIR_24631	chr3	48298523	48301270	-	48298523	48300431	ENST00000452211.5	novel	1	6	0	6	0	y	0.58	7	5	7	5	y	0.69	9	4	9	4	y	0.08	2	22	2	22	n	0.29	2	5	2	5	y	0.36	8	14	8	14	y	0.0338683	-3.39303	down	ENSG00000172113.8
A5SS&ES	novel_NIR_29001	chr6	36676570	36684097	+	36677933	36684097	ENST00000448526.6	novel	0.83	5	1	5	1	y	1	3	0	3	0	y	1	20	0	20	0	y	0.57	28	21	28	21	y	0.33	9	18	9	18	y	0.38	6	10	6	10	y	0.00601402	-5.58581	down	ENSG00000124762.13
A5SS&ES	known_NIR_1710	chr10	13100302	13109112	+	13108289	13109112	ENST00000263036.9	known	0.84	76	14	76	14	y	0.85	35	6	35	6	y	0.86	87	14	87	14	y	0.89	66	8	66	8	y	0.95	62	3	62	3	y	0.95	72	4	72	4	y	0.0479644	3.84308	up	ENSG00000123240.16
A5SS&ES	known_NIR_2323	chr11	3808651	3823883	+	3811424	3823883	ENST00000396986.6	known	0.12	5	35	5	35	y	0.08	2	23	2	23	y	0.1	8	73	8	73	y	0.15	8	45	8	45	y	0.15	10	58	10	58	y	0.14	6	37	6	37	y	0.0469438	3.8829	up	ENSG00000148985.19
A5SS&ES	known_NIR_2325	chr11	3808651	3823883	+	3822993	3823883	ENST00000396991.6	known	0.28	5	13	5	13	y	0.22	2	7	2	7	n	0.29	8	20	8	20	y	0.4	8	12	8	12	y	0.45	10	12	10	12	y	0.46	6	7	6	7	y	0.00410603	6.04488	up	ENSG00000148985.19
A5SS&ES	known_NIR_2326	chr11	3808651	3823883	+	3823740	3823883	ENST00000532523.5	known	0.42	5	7	5	7	y	0.33	2	4	2	4	n	0.26	8	23	8	23	y	0.67	8	4	8	4	y	0.62	10	6	10	6	y	0.6	6	4	6	4	y	0.0127156	5.77748	up	ENSG00000148985.19
A5SS&ES	known_NIR_2331	chr11	3817535	3823883	+	3823740	3823883	ENST00000532523.5	known	0.12	1	7	1	7	n	0.33	2	4	2	4	n	0.36	13	23	13	23	y	0.67	8	4	8	4	y	0.6	9	6	9	6	y	0.6	6	4	6	4	y	0.033475	4.47134	up	ENSG00000148985.19
A5SS&ES	known_NIR_4090	chr14	100361921	100375283	-	100361921	100369087	ENST00000355338.6	known	0.04	8	177	8	177	y	0.02	3	134	3	134	y	0.03	8	250	8	250	y	0.07	16	205	16	205	y	0.08	10	117	10	117	y	0.08	14	171	14	171	y	0.00483389	7	up	ENSG00000140105.17
A5SS&ES	known_NIR_4340	chr14	24214151	24214546	-	24214151	24214310	ENST00000565988.1	known	0.08	22	258	22	258	y	0.08	26	312	26	312	y	0.1	40	369	40	369	y	0.11	30	249	30	249	y	0.13	33	226	33	226	y	0.14	45	287	45	287	y	0.0253033	3.61814	up	ENSG00000260669.2
A5SS&ES	known_NIR_8143	chr19	46148297	46160415	+	46149037	46160415	ENST00000434646.6	known	0.11	92	764	92	764	y	0.12	109	833	109	833	y	0.11	159	1280	159	1280	y	0.12	113	829	113	829	y	0.13	138	940	138	940	y	0.13	151	987	151	987	y	0.0474207	2.82843	up	ENSG00000204866.8
A5SS&ES	known_NIR_9408	chr2	68047319	68062958	-	68047319	68053061	ENST00000407324.5	known	0.67	79	39	79	39	y	0.73	106	40	106	40	y	0.74	188	67	188	67	y	0.8	97	24	97	24	y	0.77	80	24	80	24	y	0.82	92	20	92	20	y	0.0409546	3.175	up	ENSG00000197223.11
A5SS&ES	known_NIR_9905	chr20	5109445	5111764	-	5109445	5111500	ENST00000342308.9	known	0.5	18	18	18	18	y	0.49	19	20	19	20	y	0.47	43	49	43	49	y	0.86	30	5	30	5	y	0.69	34	15	34	15	y	0.67	57	28	57	28	y	0.0495239	4.15853	up	ENSG00000089063.14
A5SS&ES	known_NIR_9908	chr20	5109445	5112720	-	5109445	5111500	ENST00000379286.6	known	0.31	8	18	8	18	y	0.39	13	20	13	20	y	0.46	42	49	42	49	y	0.75	15	5	15	5	y	0.62	24	15	24	15	y	0.67	57	28	57	28	y	0.00733516	5.0977	up	ENSG00000089063.14
A5SS&ES	known_NIR_9912	chr20	5109445	5112743	-	5109445	5111500	ENST00000342308.9	known	0.58	25	18	25	18	y	0.63	34	20	34	20	y	0.47	43	49	43	49	y	0.82	23	5	23	5	y	0.77	50	15	50	15	y	0.72	72	28	72	28	y	0.0270613	3.79215	up	ENSG00000089063.14
A5SS&ES	known_NIR_10170	chr21	46287123	46296162	+	46291462	46296162	ENST00000397694.5	known	0.03	2	56	2	56	y	0.02	2	109	2	109	y	0	0	98	0	98	n	0.09	8	81	8	81	y	0.05	5	100	5	100	y	0.09	10	100	10	100	y	0.02565	3.75326	up	ENSG00000182362.13
A5SS&ES	known_NIR_12669	chr6	30296237	30326354	-	30296237	30314269	ENST00000413358.6	known	0.17	5	24	5	24	y	0.45	5	6	5	6	y	0.46	13	15	13	15	y	0.59	19	13	19	13	y	0.76	13	4	13	4	y	0.75	15	5	15	5	y	0.048944	3.09518	up	ENSG00000231074.8
A5SS&ES	known_NIR_13819	chr8	141427069	141430927	+	141427824	141430927	ENST00000524028.1	known	0	0	28	0	28	n	0.07	4	53	4	53	y	0	0	44	0	44	n	0.17	5	25	5	25	y	0.15	4	23	4	23	y	0.23	7	23	7	23	y	0.00881937	4.77618	up	ENSG00000184489.11
A5SS&ES	novel_NIR_1535	chr1	203795794	203801575	+	203796496	203801575	ENST00000367212.7	novel	0.54	7	6	7	6	y	0.25	2	6	2	6	y	0.36	4	7	4	7	y	1	2	0	2	0	y	-	-	-	-	-	-	1	2	0	2	0	y	0.018274	7.29569	up	ENSG00000058673.15
A5SS&ES	novel_NIR_17047	chr19	40348768	40366419	+	40365585	40366419	ENST00000356508.9	novel	0.41	25	36	25	36	y	0.26	12	35	12	35	y	0.35	26	48	26	48	y	0.53	38	34	38	34	y	0.55	38	31	38	31	y	0.56	41	32	41	32	y	0.0372025	4.6471	up	ENSG00000105223.18
A5SS&ES	novel_NIR_20718	chr2	87455973	87521207	+	87472885	87521207	ENST00000419680.6	novel	0.09	1	10	1	10	n	0.14	1	6	1	6	n	0.11	2	17	2	17	n	-	-	-	-	-	-	1	10	0	10	0	y	1	6	0	6	0	y	0.00026842	61.0246	up	ENSG00000222041.10
cassetteExon	known_NIR_103	chr1	114736855;114737563	114737471;114737963	-	114736855	114737963	ENST00000339438.10	known	0.13	21.5	149	23;20	149	y	0.17	15.5	77	17;14	77	y	0.15	27	157	26;28	157	y	0.09	15	143	14;16	143	y	0.11	16.5	137	11;22	137	y	0.09	17.5	169	22;13	169	y	0.0248175	-4	down	ENSG00000009307.15
cassetteExon	known_NIR_111	chr1	11736235;11746223	11745803;11747440	+	11736235	11747440	ENST00000376637.7	known	1	136	0	258;14	0	n	0.98	178	4	334;22	4	y	0.97	239.5	8	457;22	8	y	0.94	160.5	11	297;24	11	y	0.96	158	6	309;7	6	y	0.92	171.5	14	327;16	14	y	0.0442361	-2.9824	down	ENSG00000177674.15
cassetteExon	known_NIR_765	chr1	173871148;173873566	173873467;173885636	+	173871148	173885636	ENST00000367704.5	known	1	2.5	0	3;2	0	n	1	3.5	0	5;2	0	n	1	9.5	0	8;11	0	n	0.65	7.5	4	2;13	4	y	0.75	3	1	2;4	1	n	0.71	5	2	4;6	2	y	0.00945883	-10.209	down	ENSG00000185278.14
cassetteExon	known_NIR_865	chr1	203727571;203733400	203733223;203739546	+	203727571	203739546	ENST00000357681.9	known	0.27	4.5	12	9;0	12	n	0.48	7.5	8	15;0	8	n	0.29	7	17	10;4	17	y	0.1	1.5	13	3;0	13	n	0	0	5	0;0	5	n	0.11	3	24	6;0	24	n	0.0347552	-3.66097	down	ENSG00000058668.14
cassetteExon	known_NIR_907	chr1	207767195;207767823	207767607;207783292	+	207767195	207783292	ENST00000360212.6	known	0.7	9.5	4	11;8	4	y	1	4.5	0	9;0	0	n	0.62	10	6	12;8	6	y	0.39	4.5	7	3;6	7	y	0.32	7.5	16	3;12	16	y	0.08	1	12	0;2	12	n	0.0284859	-3.42375	down	ENSG00000117335.18
cassetteExon	known_NIR_1035	chr1	228108321;228108508	228108437;228108955	-	228108321	228108955	ENST00000366742.5	known	0.27	16	43	30;2	43	y	0.21	20.5	79	37;4	79	y	0.23	24.5	83	48;1	83	n	0.13	11.5	76	23;0	76	n	0.16	21	108	38;4	108	y	0.18	17	78	32;2	78	y	0.0263783	-3.50076	down	ENSG00000162910.18
cassetteExon	known_NIR_1050	chr1	228140363;228141288	228141124;228145511	+	228140363	228145511	ENST00000391865.7	known	0.29	260	650	168;352	650	y	0.29	339.5	849	242;437	849	y	0.29	468	1161	310;626	1161	y	0.23	273.5	938	208;339	938	y	0.24	284	919	199;369	919	y	0.23	332.5	1108	258;407	1108	y	0.00344235	-17	down	ENSG00000143774.16
cassetteExon	known_NIR_1060	chr1	228147699;228148456	228148234;228148665	+	228147699	228148665	ENST00000366728.6	known	0.86	1121	190	0;2242	190	n	0.85	1546	265	11;3081	265	y	0.87	2052	313	0;4104	313	n	0.83	1298	273	14;2582	273	y	0.81	1445	344	0;2890	344	n	0.82	1579	343	0;3158	343	n	0.00804989	-4.89898	down	ENSG00000143774.16
cassetteExon	known_NIR_1062	chr1	228147699;228148539	228148371;228148665	+	228147699	228148665	ENST00000366728.6	known	0.83	942.5	190	1805;80	190	y	0.83	1308	265	2496;120	265	y	0.85	1829.5	313	3468;191	313	y	0.81	1192	273	2298;86	273	y	0.79	1304	344	2509;99	344	y	0.8	1402	343	2691;113	343	y	0.0147784	-4.15761	down	ENSG00000143774.16
cassetteExon	known_NIR_1243	chr1	33010833;33012122	33012074;33013207	-	33010833	33013207	ENST00000629371.2	known	0.02	6.5	425	6;7	425	y	0.03	13	395	7;19	395	y	0.03	18.5	557	15;22	557	y	0.01	6	396	1;11	396	n	0.01	3.5	395	3;4	395	y	0.02	10.5	509	8;13	509	y	0.0474207	-2.82843	down	ENSG00000004455.16
cassetteExon	known_NIR_1755	chr10	21538912;21551921	21551816;21556643	+	21538912	21556643	ENST00000377100.7	known	0.11	2.5	21	2;3	21	y	0.05	2	35	0;4	35	n	0.1	4.5	39	5;4	39	y	0.04	1	22	2;0	22	n	0	0	39	0;0	39	n	0	0	21	0;0	21	n	0.0374414	-3.20903	down	ENSG00000078403.16
cassetteExon	known_NIR_2414	chr11	47565986;47569891	47569700;47571471	+	47565986	47571471	ENST00000426530.2	known	0.6	356.5	237	294;419	237	y	0.57	490	374	405;575	374	y	0.59	629	432	538;720	432	y	0.55	402.5	326	357;448	326	y	0.55	418.5	340	359;478	340	y	0.52	457.5	414	368;547	414	y	0.0255316	-3.5	down	ENSG00000110536.13
cassetteExon	known_NIR_2942	chr11	77323360;77325376	77325328;77332730	-	77323360	77332730	ENST00000356341.7	known	0.12	26	189	32;20	189	y	0.16	29	154	32;26	154	y	0.13	43.5	287	41;46	287	y	0.09	18.5	184	17;20	184	y	0.08	22	239	33;11	239	y	0.06	15.5	253	16;15	253	y	0.0187267	-4.02492	down	ENSG00000149269.9
cassetteExon	known_NIR_3536	chr12	53295639;53296275	53295839;53297850	+	53295639	53297850	ENST00000351500.7	known	0.94	2999.5	189	2459;3540	189	y	0.93	3568.5	278	2962;4175	278	y	0.93	4787	348	4127;5447	348	y	0.91	3066.5	312	2722;3411	312	y	0.91	3290.5	332	2744;3837	332	y	0.92	3457.5	288	2957;3958	288	y	0.0132356	-4.24264	down	ENSG00000123349.13
cassetteExon	known_NIR_4032	chr13	49661208;49663195	49663057;49669777	-	49661208	49669777	ENST00000378272.9	known	0.98	574	11	752;396	11	y	0.97	647	21	889;405	21	y	0.98	901.5	15	1163;640	15	y	0.96	600.5	23	762;439	23	y	0.96	641.5	27	811;472	27	y	0.97	687	19	913;461	19	y	0.0474207	-2.82843	down	ENSG00000123179.13
cassetteExon	known_NIR_4170	chr14	104792722;104793210	104793127;104795484	-	104792722	104795484	ENST00000407796.6	known	0.6	27	18	52;2	18	y	0.64	28	16	56;0	16	n	0.74	55.5	19	105;6	19	y	0.53	41.5	37	79;4	37	y	0.42	34.5	48	68;1	48	n	0.43	35	47	69;1	47	n	0.0224232	-3.67194	down	ENSG00000142208.15
cassetteExon	known_NIR_5550	chr16	3065494;3065687	3065642;3065784	+	3065494	3065784	ENST00000325568.9	known	0.48	252	275	11;493	275	y	0.48	320	353	0;640	353	n	0.49	393.5	414	8;779	414	y	0.44	324.5	405	3;646	405	y	0.41	329.5	476	0;659	476	n	0.45	348.5	430	6;691	430	y	0.044741	-4.00892	down	ENSG00000008517.16
cassetteExon	known_NIR_5552	chr16	3065494;3065710	3065621;3065784	+	3065494	3065784	ENST00000325568.9	known	0.21	74.5	275	3;146	275	y	0.19	82.5	353	2;163	353	y	0.2	105	414	16;194	414	y	0.17	81.5	405	16;147	405	y	0.17	98	476	7;189	476	y	0.18	94.5	430	13;176	430	y	0.0248175	-4	down	ENSG00000008517.16
cassetteExon	known_NIR_5554	chr16	3065494;3065710	3065642;3065784	+	3065494	3065784	ENST00000325568.9	known	0.22	78.5	275	11;146	275	y	0.19	81.5	353	0;163	353	n	0.2	101	414	8;194	414	y	0.16	75	405	3;147	405	y	0.17	94.5	476	0;189	476	n	0.17	91	430	6;176	430	y	0.0398716	-3.88909	down	ENSG00000008517.16
cassetteExon	known_NIR_5679	chr16	46803070;46809785	46809603;46824386	-	46803070	46824386	ENST00000394806.6	known	0.81	29	7	21;37	7	y	0.71	24.5	10	22;27	10	y	0.76	53.5	17	54;53	17	y	0.63	30.5	18	24;37	18	y	0.54	21	18	25;17	18	y	0.61	28.5	18	34;23	18	y	0.0138328	-4.19591	down	ENSG00000155330.9
cassetteExon	known_NIR_5765	chr16	634956;635340	635281;635612	-	634956	635612	ENST00000614890.4	known	0.92	183.5	16	215;152	16	y	0.91	229.5	23	273;186	23	y	0.9	315	36	361;269	36	y	0.87	200	30	240;160	30	y	0.88	196.5	27	227;166	27	y	0.86	249.5	40	291;208	40	y	0.00804989	-4.89898	down	ENSG00000130731.15
cassetteExon	known_NIR_5934	chr16	80997429;81001334	81001248;81006734	-	80997429	81006734	ENST00000219400.7	known	0.02	3	195	0;6	195	n	0.02	7	302	9;5	302	y	0.03	16	451	20;12	451	y	0	0	306	0;0	306	n	0.01	1.5	296	0;3	296	n	0.01	5.5	393	9;2	393	y	0.0241101	-3.53553	down	ENSG00000103121.8
cassetteExon	known_NIR_6105	chr17	16439414;16439703	16439660;16440185	+	16439414	16440185	ENST00000581361.5	known	0.2	792.5	3249	264;1321	3249	y	0.21	883.5	3392	370;1397	3392	y	0.21	1240	4729	517;1963	4729	y	0.2	869	3463	344;1394	3463	y	0.19	805	3425	299;1311	3425	y	0.19	852	3663	324;1380	3663	y	0.0474207	-2.82843	down	ENSG00000175061.17
cassetteExon	known_NIR_6115	chr17	17180088;17180669	17180607;17184823	+	17180088	17184823	ENST00000395811.9	known	0.24	167	542	156;178	542	y	0.25	154.5	473	140;169	473	y	0.22	209.5	730	186;233	730	y	0.17	134.5	676	123;146	676	y	0.18	136	613	130;142	613	y	0.18	141	663	130;152	663	y	0.0124364	-6.36396	down	ENSG00000133030.19
cassetteExon	known_NIR_7519	chr19	1627426;1632405	1631951;1646355	-	1627426	1646355	ENST00000344749.9	known	0.85	68	12	16;120	12	y	0.82	59	13	8;110	13	y	0.83	116	23	28;204	23	y	0.77	85	25	21;149	25	y	0.75	81	27	11;151	27	y	0.76	78.5	25	6;151	25	y	0.00381862	-6.95701	down	ENSG00000071564.14
cassetteExon	known_NIR_7520	chr19	1627426;1632405	1632038;1646355	-	1627426	1646355	ENST00000344749.9	known	0.9	102.5	12	85;120	12	y	0.88	99	13	88;110	13	y	0.89	177.5	23	151;204	23	y	0.84	136	25	123;149	25	y	0.82	120	27	89;151	27	y	0.84	131	25	111;151	25	y	0.00323191	-6.4254	down	ENSG00000071564.14
cassetteExon	known_NIR_7805	chr19	35744421;35744692	35744626;35745125	-	35744421	35745125	ENST00000378975.7	known	0.66	31.5	16	43;20	16	y	0.64	32.5	18	49;16	18	y	0.6	31	21	48;14	21	y	0.51	35	34	58;12	34	y	0.5	25	25	41;9	25	y	0.41	24	34	34;14	34	y	0.0199899	-4.40015	down	ENSG00000161265.14
cassetteExon	known_NIR_7868	chr19	38216403;38217591	38217460;38217798	-	38216403	38217798	ENST00000420980.6	known	1	28	0	35;21	0	n	1	31	0	36;26	0	n	0.96	49	2	60;38	2	y	0.78	36	10	46;26	10	y	0.87	48	7	48;48	7	y	0.86	36	6	36;36	6	y	0.0198565	-4.76999	down	ENSG00000011332.19
cassetteExon	known_NIR_8435	chr19	55145565;55146466	55146434;55146681	-	55145565	55146681	ENST00000587758.5	known	0.38	271.5	452	284;259	452	y	0.36	297	523	308;286	523	y	0.37	416	720	424;408	720	y	0.33	271	547	280;262	547	y	0.35	328	618	342;314	618	y	0.32	299	634	327;271	634	y	0.0321988	-3.47851	down	ENSG00000105048.16
cassetteExon	known_NIR_8575	chr19	805187;805569	805513;806408	+	805187	806408	ENST00000349038.8	known	0.73	195	72	15;375	72	y	0.72	181.5	72	17;346	72	y	0.67	256	128	16;496	128	y	0.57	183.5	137	10;357	137	y	0.64	219	124	13;425	124	y	0.62	203.5	126	18;389	126	y	0.0262126	-3.46616	down	ENSG00000011304.16
cassetteExon	known_NIR_9411	chr2	68047319;68053137	68053061;68062958	-	68047319	68062958	ENST00000410067.7	known	0.21	21.5	79	39;4	79	y	0.17	21	106	40;2	106	y	0.16	37	188	67;7	188	y	0.11	12	97	24;0	97	n	0.14	13.5	80	24;3	80	y	0.12	12.5	92	20;5	92	y	0.0446198	-3.2127	down	ENSG00000197223.11
cassetteExon	known_NIR_9435	chr2	70300980;70301603	70301408;70301925	-	70300980	70301925	ENST00000037869.7	known	0.04	7.5	177	3;12	177	y	0.03	8.5	235	1;16	235	n	0.03	9	332	2;16	332	y	0.01	1	170	1;1	170	n	0.01	2.5	221	0;5	221	n	0.02	4	237	0;8	237	n	0.0132356	-4.24264	down	ENSG00000035141.7
cassetteExon	known_NIR_9468	chr2	74421816;74422375	74422153;74422870	+	74421816	74422870	ENST00000409791.5	known	0.96	45	2	32;58	2	y	1	62.5	0	50;75	0	n	0.98	112	2	84;140	2	y	0.9	56.5	6	58;55	6	y	0.94	62.5	4	54;71	4	y	0.93	68	5	60;76	5	y	0.0273453	-3.4	down	ENSG00000005448.16
cassetteExon	known_NIR_9754	chr20	37519350;37521451	37521319;37527793	-	37519350	37527793	ENST00000373537.6	known	0.06	3	48	6;0	48	n	0.07	3.5	49	4;3	49	y	0.05	6.5	130	13;0	130	n	0.02	2.5	99	2;3	99	y	0.04	4.5	98	7;2	98	y	0.03	2.5	73	5;0	73	n	0.0213116	-3.67423	down	ENSG00000166619.12
cassetteExon	known_NIR_10366	chr22	29328895;29329720	29329712;29330378	-	29328895	29330378	ENST00000432560.6	known	0.03	8.5	271	9;8	271	y	0.04	14	317	17;11	317	y	0.03	12.5	474	13;12	474	y	0.02	7	317	8;6	317	y	0.01	3	374	3;3	374	y	0.01	2.5	418	3;2	418	y	0.0132356	-4.24264	down	ENSG00000100280.16
cassetteExon	known_NIR_10452	chr22	37024810;37025127	37025002;37029216	+	37024810	37029216	ENST00000401419.7	known	0.01	7	490	0;14	490	n	0.02	10.5	657	4;17	657	y	0.02	14	916	16;12	916	y	0	2.5	612	0;5	612	n	0	0	624	0;0	624	n	0.01	3.5	688	0;7	688	n	0.0474207	-2.82843	down	ENSG00000128309.16
cassetteExon	known_NIR_10970	chr3	186790255;186790406	186790326;186791725	-	186790255	186791725	ENST00000433496.5	known	1	382	0	364;400	0	n	1	392.5	0	365;420	0	n	0.99	613	8	579;647	8	y	0.99	306.5	3	273;340	3	y	0.98	319	5	295;343	5	y	0.98	366	6	360;372	6	y	0.0474207	-2.82843	down	ENSG00000163918.10
cassetteExon	known_NIR_11319	chr3	57864716;57865292	57864807;57890041	+	57864716	57890041	ENST00000449503.6	known	0.59	10	7	15;5	7	y	1	3	0	5;1	0	n	0.58	5.5	4	11;0	4	n	0.19	2.5	11	5;0	11	n	0	0	2	0;0	2	n	0.27	5.5	15	9;2	15	y	0.033854	-3.5656	down	ENSG00000163681.14
cassetteExon	known_NIR_11341	chr3	58412963;58420568	58420536;58424752	+	58412963	58424752	ENST00000356151.6	known	0.14	4	24	8;0	24	n	0.23	3	10	5;1	10	n	0.15	6.5	37	9;4	37	y	0.05	2	42	3;1	42	n	0.03	1	31	2;0	31	n	0.11	3.5	28	5;2	28	y	0.0433777	-2.95161	down	ENSG00000168297.15
cassetteExon	known_NIR_11560	chr4	1703700;1711990	1711874;1712130	-	1703700	1712130	ENST00000429429.6	known	0.98	150.5	3	211;90	3	y	0.96	138	6	181;95	6	y	0.97	259.5	8	330;189	8	y	0.94	167	11	217;117	11	y	0.93	195.5	14	298;93	14	y	0.92	186	17	239;133	17	y	0.00804989	-4.89898	down	ENSG00000163950.12
cassetteExon	known_NIR_12672	chr6	30296237;30314482	30314269;30326354	-	30296237	30326354	ENST00000438412.5	known	0.74	14	5	24;4	5	y	0.55	6	5	6;6	5	y	0.49	12.5	13	15;10	13	y	0.37	11	19	13;9	19	y	0.37	7.5	13	4;11	13	y	0.14	2.5	15	5;0	15	n	0.0492894	-2.79078	down	ENSG00000231074.8
cassetteExon	known_NIR_13545	chr7	65071042;65072247	65072145;65073441	+	65071042	65073441	ENST00000419314.5	known	0.48	5.5	6	3;8	6	y	0.56	9	7	6;12	7	y	0.62	16.5	10	9;24	10	y	0.36	8	14	4;12	14	y	0.35	12.5	23	9;16	23	y	0.44	4	5	2;6	5	y	0.0314781	-3.43063	down	ENSG00000234585.6
cassetteExon	known_NIR_13569	chr7	72949102;72949491	72949313;72949846	-	72949102	72949846	ENST00000602348.5	known	1	15	0	16;14	0	n	1	18	0	26;10	0	n	1	19.5	0	27;12	0	n	0.68	15	7	15;15	7	y	0.77	24	7	26;22	7	y	0.81	13	3	19;7	3	y	0.0234373	-6.41661	down	ENSG00000106133.17
cassetteExon	known_NIR_13886	chr8	144242515;144242628	144242602;144243494	+	144242515	144243494	ENST00000534366.5	known	0.21	4	15	3;5	15	y	0.12	2	14	2;2	14	y	0.18	2	9	2;2	9	y	0	0	12	0;0	12	n	0	0	9	0;0	9	n	0.11	1	8	2;0	8	n	0.0472675	-2.94884	down	ENSG00000179832.17
cassetteExon	known_NIR_14043	chr8	55740218;55745121	55745061;55750964	-	55740218	55750964	ENST00000334667.6	known	1	20	0	0;40	0	n	0.89	15.5	2	0;31	2	n	0.91	40.5	4	0;81	4	n	0.73	22	8	0;44	8	n	0.8	16.5	4	2;31	4	y	0.81	34.5	8	0;69	8	n	0.0252432	-3.63662	down	ENSG00000167904.14
cassetteExon	known_NIR_14859	chrX	48895101;48895454	48895352;48896759	-	48895101	48896759	ENST00000376582.7	known	0.04	28	718	52;4	718	y	0.03	26.5	873	49;4	873	y	0.04	44.5	1145	76;13	1145	y	0.02	13	818	26;0	818	n	0.03	25.5	807	47;4	807	y	0.02	18	893	36;0	893	n	0.0474207	-2.82843	down	ENSG00000126768.12
cassetteExon	novel_NIR_1456	chr1	19787117;19793648	19793432;19798137	-	19787117	19798137	ENST00000294543.10	novel	0.13	2	13	0;4	13	n	0.2	1	4	0;2	4	n	0.24	3.5	11	3;4	11	y	0	0	11	0;0	11	n	0	0	14	0;0	14	n	0	0	18	0;0	18	n	0.027451	-5.91062	down	ENSG00000162542.13
cassetteExon	novel_NIR_5372	chr11	2979237;2988126	2988073;2989129	-	2979237	2989129	ENST00000526115.5	novel	0.19	2.5	11	2;3	11	y	0.1	1	9	0;2	9	n	0.2	6.5	26	6;7	26	y	0	0	17	0;0	17	n	0	0	22	0;0	22	n	0	0	20	0;0	20	n	0.0358738	-5.1366	down	ENSG00000205531.12
cassetteExon	novel_NIR_5373	chr11	2979237;2988126	2988077;2989129	-	2979237	2989129	ENST00000526115.5	novel	0.19	2.5	11	2;3	11	y	0.18	2	9	2;2	9	y	0.15	4.5	26	2;7	26	y	0	0	17	0;0	17	n	0	0	22	0;0	22	n	0	0	20	0;0	20	n	0.0047733	-14.4222	down	ENSG00000205531.12
cassetteExon	novel_NIR_7392	chr12	132572622;132574158	132574090;132574319	+	132572622	132574319	ENST00000434748.2	novel	1	29.5	0	29;30	0	y	1	43	0	46;40	0	y	1	66	0	53;79	0	y	0.95	53.5	3	43;64	3	y	0.89	76.5	9	42;111	9	y	0.89	57	7	42;72	7	y	0.0460019	-4.5	down	ENSG00000112787.12
cassetteExon	novel_NIR_8964	chr13	41260915;41262481	41262411;41263485	-	41260915	41263485	ENST00000379480.8	novel	1	0.5	0	1;0	0	n	0.8	4	1	4;4	1	y	0.43	3	4	4;2	4	y	0	0	5	0;0	5	n	0.27	3	8	0;6	8	n	0	0	6	0;0	6	n	0.0396319	-3.44443	down	ENSG00000120662.15
cassetteExon	novel_NIR_18633	chr2	113625729;113626277	113626216;113626830	-	113625729	113626830	ENST00000416673.6	novel	0.17	2.5	12	5;0	12	n	0.14	5	32	8;2	32	n	0.17	4	20	6;2	20	y	0	0	41	0;0	41	n	0	0	14	0;0	14	n	0.01	0.5	41	1;0	41	n	0.00187853	-14.8627	down	ENSG00000240356.6
cassetteExon	novel_NIR_18634	chr2	113625729;113626571	113626216;113626830	-	113625729	113626830	ENST00000416673.6	novel	0.17	2.5	12	5;0	12	n	0.11	4	32	8;0	32	n	0.17	4	20	6;2	20	y	0.01	0.5	41	0;1	41	n	0	0	14	0;0	14	n	0.01	0.5	41	1;0	41	n	0.0167857	-7.06916	down	ENSG00000240356.6
cassetteExon	novel_NIR_19456	chr2	218660421;218660748	218660635;218660939	+	218660421	218660939	ENST00000439945.5	novel	0.11	2	17	1;3	17	n	0.15	3	17	4;2	17	y	0.08	3	33	0;6	33	n	0	0	17	0;0	17	n	0	0	26	0;0	26	n	0.06	3	49	2;4	49	n	0.030591	-3.27715	down	ENSG00000074582.12
cassetteExon	novel_NIR_20895	chr20	13808902;13814515	13814418;13816463	+	13808902	13816463	ENST00000378106.9	novel	0.24	42.5	131	42;43	131	y	0.22	37.5	132	39;36	132	y	0.21	54.5	199	47;62	199	y	0.17	22.5	113	26;19	113	y	0.14	18	113	17;19	113	n	0.19	42	174	53;31	174	y	0.0387552	-3.33397	down	ENSG00000101247.17
cassetteExon	novel_NIR_30279	chr7	28818179;28818789	28818761;28819116	+	28818179	28819116	ENST00000396299.6	novel	0.26	2.5	7	5;0	7	n	0.27	8	22	8;8	22	y	0.16	3.5	18	3;4	18	y	0.05	1	18	1;1	18	n	0.12	2	14	0;4	14	n	0.11	2	16	0;4	16	n	0.0388397	-3.30387	down	ENSG00000146592.16
cassetteExon	novel_NIR_32786	chr9	129068332;129068975	129068838;129069076	+	129068332	129069076	ENST00000358369.8	novel	0.21	3.5	13	1;6	13	n	0.27	4	11	0;8	11	n	0.2	7.5	30	4;11	30	y	0.06	1	16	2;0	16	n	0.12	2	15	0;4	15	n	0.1	2.5	23	1;4	23	n	0.0100026	-4.74713	down	ENSG00000148343.18
cassetteExon	known_NIR_1244	chr1	33014594;33021461	33021367;33021593	-	33014594	33021593	ENST00000629371.2	known	0.91	1010	100	1243;777	100	y	0.9	1029	117	1282;776	117	y	0.9	1549.5	168	1933;1166	168	y	0.92	1049	91	1299;799	91	y	0.92	1144.5	97	1384;905	97	y	0.91	1251.5	117	1485;1018	117	y	0.0474207	2.82843	up	ENSG00000004455.16
cassetteExon	known_NIR_1627	chr10	110901612;110907836	110907680;110918121	-	110901612	110918121	ENST00000448814.5	known	0.04	4.5	97	9;0	97	n	0.06	8	126	5;11	126	y	0.05	7	142	7;7	142	y	0.08	9	107	8;10	107	y	0.1	9.5	88	13;6	88	y	0.12	11	80	6;16	80	y	0.0315622	3.87298	up	ENSG00000214413.7
cassetteExon	known_NIR_1744	chr10	15135418;15141029	15140987;15141422	-	15135418	15141422	ENST00000378165.8	known	0	0	22	0;0	22	n	0	0	31	0;0	31	n	0.06	3	46	5;1	46	n	0.15	4	23	4;4	23	y	0.09	1.5	15	3;0	15	n	0.11	3.5	27	2;5	27	y	0.022857	3.625	up	ENSG00000152465.17
cassetteExon	known_NIR_2086	chr11	118094855;118099034	118098985;118103101	+	118094855	118103101	ENST00000616579.4	known	0.88	49.5	7	99;0	7	n	0.9	53	6	106;0	6	n	0.92	76	7	147;5	7	y	0.96	52.5	2	93;12	2	y	0.97	74.5	2	144;5	2	y	0.95	71.5	4	141;2	4	y	0.0196198	4.64758	up	ENSG00000137648.16
cassetteExon	known_NIR_2315	chr11	3808315;3811424	3811250;3822909	+	3808315	3822909	ENST00000465307.6	known	0.67	4	2	2;6	2	y	0.67	4	2	4;4	2	y	0.61	9.5	6	9;10	6	y	0.8	8	2	9;7	2	y	1	6.5	0	7;6	0	n	1	7.5	0	12;3	0	n	0.0416831	4.07076	up	ENSG00000148985.19
cassetteExon	known_NIR_2484	chr11	61430182;61437848	61437625;61445941	+	61430182	61445941	ENST00000542074.1	known	0.7	78.5	34	157;0	34	n	0.78	99.5	28	199;0	28	n	0.77	120.5	36	241;0	36	n	0.86	101.5	17	183;20	17	y	1	112	0	224;0	0	n	0.89	99	12	198;0	12	n	0.0385248	3.371	up	ENSG00000167985.6
cassetteExon	known_NIR_2485	chr11	61430182;61438113	61437625;61445941	+	61430182	61445941	ENST00000542074.1	known	0.84	179	34	157;201	34	y	0.89	236.5	28	199;274	28	y	0.89	303.5	36	241;366	36	y	0.93	212.5	17	183;242	17	y	1	248.5	0	224;273	0	n	0.96	267	12	198;336	12	y	0.0281441	3.429	up	ENSG00000167985.6
cassetteExon	known_NIR_3330	chr12	132690376;132701369	132701250;132704619	+	132690376	132704619	ENST00000543589.5	known	0.89	164.5	20	4;325	20	y	0.88	213.5	28	7;420	28	y	0.87	267.5	39	6;529	39	y	0.93	192.5	14	0;385	14	n	0.92	189	16	5;373	16	y	0.9	210	24	8;412	24	y	0.0321988	3.47851	up	ENSG00000176894.9
cassetteExon	known_NIR_4309	chr14	23960003;23965983	23965762;23967211	+	23960003	23967211	ENST00000543741.6	known	0.31	63.5	141	125;2	141	y	0.32	73.5	159	145;2	159	y	0.28	94.5	239	189;0	239	n	0.35	78.5	143	157;0	143	n	0.39	85.5	136	167;4	136	y	0.34	92	180	184;0	180	n	0.0463885	2.91548	up	ENSG00000157326.18
cassetteExon	known_NIR_4765	chr15	101650161;101651773	101651696;101652271	-	101650161	101652271	ENST00000428002.6	known	0.28	13.5	34	20;7	34	y	0.31	16	35	16;16	35	y	0.27	26.5	70	30;23	70	y	0.4	24.5	36	27;22	36	y	0.43	17.5	23	24;11	23	y	0.44	26.5	34	38;15	34	y	0.00129855	8.04076	up	ENSG00000184277.12
cassetteExon	known_NIR_4880	chr15	50309798;50346395	50346372;50354985	-	50309798	50354985	ENST00000380877.7	known	0	0	38	0;0	38	n	0.13	3	20	2;4	20	y	0.06	3.5	53	3;4	53	y	0.27	10	27	10;10	27	y	0.16	7.5	39	8;7	39	y	0.24	4	13	4;4	13	y	0.0335144	3.20713	up	ENSG00000104064.16
cassetteExon	known_NIR_5439	chr16	28905759;28905878	28905867;28906019	-	28905759	28906019	ENST00000357573.10	known	0.97	70.5	2	69;72	2	y	0.97	97	3	91;103	3	y	0.98	137.5	3	130;145	3	y	1	81	0	80;82	0	n	1	96.5	0	97;96	0	n	1	80.5	0	78;83	0	n	0.0152681	8	up	ENSG00000177548.12
cassetteExon	known_NIR_5925	chr16	80980879;80981877	80981806;80997314	-	80980879	80997314	ENST00000486645.5	known	0.9	167.5	19	110;225	19	y	0.92	183	17	101;265	17	y	0.9	230.5	26	140;321	26	y	0.96	168	7	81;255	7	y	0.95	160.5	9	112;209	9	y	0.94	211.5	13	117;306	13	y	0.00838827	4.91354	up	ENSG00000103121.8
cassetteExon	known_NIR_6268	chr17	35657791;35670898	35670857;35671754	+	35657791	35671754	ENST00000621914.4	known	0.2	46	181	44;48	181	y	0.18	31.5	144	28;35	144	y	0.23	66.5	225	44;89	225	y	0.27	45	124	41;49	124	y	0.28	65.5	166	67;64	166	y	0.26	45.5	131	43;48	131	y	0.030975	4.26401	up	ENSG00000006125.16
cassetteExon	known_NIR_6413	chr17	42838205;42838799	42838692;42838945	+	42838205	42838945	ENST00000541124.5	known	0.92	323	29	10;636	29	y	0.91	287.5	30	5;570	30	y	0.92	438.5	38	3;874	38	y	0.96	329.5	15	1;658	15	n	0.94	361	22	4;718	22	y	0.97	358.5	10	0;717	10	n	0.0326719	4.24264	up	ENSG00000131467.10
cassetteExon	known_NIR_6508	chr17	47945612;47945989	47945861;47946323	+	47945612	47946323	ENST00000434554.6	known	0.97	56	2	54;58	2	y	0.98	64.5	1	52;77	1	n	0.96	96	4	83;109	4	y	1	59.5	0	39;80	0	n	1	74	0	57;91	0	n	1	60	0	43;77	0	n	0.0350987	5.19615	up	ENSG00000108439.9
cassetteExon	known_NIR_6721	chr17	72404816;72420964	72420700;72428236	-	72404816	72428236	ENST00000457958.6	known	0.09	4	42	3;5	42	y	0.06	2.5	38	5;0	38	n	0.06	3.5	55	6;1	55	n	0.16	7	37	12;2	37	y	0.12	3.5	25	7;0	25	n	0.12	6	42	9;3	42	y	0.0219243	3.8	up	ENSG00000227036.6
cassetteExon	known_NIR_7529	chr19	16647261;16654125	16654035;16659395	-	16647261	16659395	ENST00000600705.1	known	0.82	463.5	100	411;516	100	y	0.84	447.5	86	395;500	86	y	0.84	632.5	120	571;694	120	y	0.86	416	67	394;438	67	y	0.86	466.5	76	415;518	76	y	0.89	470	59	376;564	59	y	0.0455407	3.05085	up	ENSG00000268790.5
cassetteExon	known_NIR_7908	chr19	38921596;38922078	38922002;38922238	-	38921596	38922238	ENST00000594171.5	known	0.25	2	6	2;2	6	y	0	0	7	0;0	7	n	0.4	4	6	0;8	6	n	-	-	-	-	-	-	1	3.5	0	2;5	0	n	1	6.5	0	4;9	0	n	0.0214702	6.71429	up	ENSG00000104835.14
cassetteExon	known_NIR_9219	chr2	24762776;24768135	24768079;24768221	+	24762776	24768221	ENST00000406961.5	known	0.57	10.5	8	12;9	8	y	0.25	2	6	3;1	6	n	0.46	9.5	11	10;9	11	y	0.9	9.5	1	13;6	1	n	0.62	6.5	4	10;3	4	y	0.81	13	3	14;12	3	y	0.0497102	2.80025	up	ENSG00000084676.15
cassetteExon	known_NIR_9630	chr20	31778984;31781046	31780939;31782249	+	31778984	31782249	ENST00000300403.10	known	0.01	3	254	4;2	254	y	0.01	1	197	2;0	197	n	0.01	5	358	6;4	358	y	0.03	8.5	292	7;10	292	y	0.02	6.5	284	5;8	284	y	0.03	9.5	288	11;8	288	y	0.0377496	5	up	ENSG00000088325.15
cassetteExon	known_NIR_9995	chr20	63241506;63242623	63242539;63244024	-	63241506	63244024	ENST00000370313.5	known	0.64	3.5	2	6;1	2	n	0.62	6.5	4	5;8	4	y	0.54	9.5	8	17;2	8	y	0.78	3.5	1	4;3	1	n	0.87	6.5	1	13;0	1	n	1	10	0	9;11	0	n	0.030354	4.00249	up	ENSG00000101198.14
cassetteExon	known_NIR_10246	chr22	18083732;18085258	18085112;18087972	+	18083732	18087972	ENST00000610387.4	known	0.71	27.5	11	23;32	11	y	0.53	13.5	12	17;10	12	y	0.54	30.5	26	18;43	26	y	0.79	26.5	7	24;29	7	y	0.76	16	5	22;10	5	y	0.86	41.5	7	46;37	7	y	0.0498845	3.20662	up	ENSG00000215193.12
cassetteExon	known_NIR_11062	chr3	37065942;37072882	37072790;37075024	-	37065942	37075024	ENST00000354379.8	known	0	0	62	0;0	62	n	0	0	52	0;0	52	n	0	0	61	0;0	61	n	0.11	6	50	10;2	50	y	0.07	4	56	5;3	56	y	0.05	4	82	8;0	82	n	0.049067	4.34659	up	ENSG00000093167.17
cassetteExon	known_NIR_11561	chr4	1717428;1717675	1717516;1718152	-	1717428	1718152	ENST00000303277.6	known	0.88	51	7	51;51	7	y	0.9	74.5	8	64;85	8	y	0.94	97.5	6	98;97	6	y	0.99	80.5	1	105;56	1	n	0.95	39.5	2	52;27	2	y	0.97	72	2	59;85	2	y	0.0481079	3.00416	up	ENSG00000168936.10
cassetteExon	known_NIR_12974	chr6	73480126;73480367	73480293;73480675	+	73480126	73480675	ENST00000415954.6	known	0.21	6.5	24	6;7	24	y	0.11	3	25	0;6	25	n	0.17	9	45	0;18	45	n	0.32	7.5	16	0;15	16	n	0.49	17.5	18	14;21	18	y	0.37	11	19	10;12	19	y	0.0257404	3.95093	up	ENSG00000135297.15
cassetteExon	known_NIR_13027	chr6	90516681;90518562	90518447;90519258	-	90516681	90519258	ENST00000369325.7	known	0.83	105.5	22	81;130	22	y	0.87	66	10	53;79	10	y	0.85	134	23	122;146	23	y	0.93	78	6	60;96	6	y	0.9	95	10	90;100	10	y	0.89	96	12	87;105	12	y	0.0273453	3.4	up	ENSG00000135341.17
cassetteExon	known_NIR_13086	chr7	101316542;101318213	101318124;101321671	-	101316542	101321671	ENST00000621899.4	known	0.91	109	11	199;19	11	y	0.86	137.5	23	240;35	23	y	0.91	145.5	15	260;31	15	y	1	117.5	0	198;37	0	n	0.95	115	6	214;16	6	y	1	109	0	191;27	0	n	0.0188045	3.81838	up	ENSG00000128581.15
cassetteExon	known_NIR_13158	chr7	12687043;12687728	12687635;12688169	+	12687043	12688169	ENST00000396664.2	known	0.38	5	8	5;5	8	y	0.09	1	10	0;2	10	n	0.22	7	25	0;14	25	n	0.58	7	5	0;14	5	n	0.57	18.5	14	5;32	14	y	0.47	11.5	13	0;23	13	n	0.0499546	3.40955	up	ENSG00000122644.12
cassetteExon	known_NIR_13528	chr7	6392041;6398718	6398662;6400126	+	6392041	6400126	ENST00000348035.8	known	0.25	551.5	1676	547;556	1676	y	0.24	514	1631	496;532	1631	y	0.23	745.5	2478	831;660	2478	y	0.27	631	1724	658;604	1724	y	0.26	680.5	1897	681;680	1897	y	0.26	675	1898	717;633	1898	y	0.0356527	3.5	up	ENSG00000136238.17
cassetteExon	known_NIR_13598	chr7	75879260;75881486	75881365;75881829	+	75879260	75881829	ENST00000006777.10	known	0.19	25.5	109	23;28	109	y	0.2	23	93	30;16	93	y	0.23	44	150	28;60	150	y	0.28	33.5	86	33;34	86	y	0.31	44.5	100	24;65	100	y	0.25	30	91	19;41	91	y	0.0305569	3.47851	up	ENSG00000005486.16
cassetteExon	known_NIR_13981	chr8	30684199;30689319	30689161;30696380	-	30684199	30696380	ENST00000537535.5	known	0.92	145	13	284;6	13	y	0.94	133	8	266;0	8	n	0.96	226	9	441;11	9	y	1	158	0	307;9	0	n	1	145.5	0	285;6	0	n	1	163.5	0	314;13	0	n	0.0350987	5.19615	up	ENSG00000104687.12
cassetteExon	known_NIR_13983	chr8	30684199;30693055	30692969;30696380	-	30684199	30696380	ENST00000537535.5	known	0.89	104.5	13	11;198	13	y	0.9	75.5	8	4;147	8	y	0.94	138.5	9	6;271	9	y	1	95	0	0;190	0	n	1	95.5	0	12;179	0	n	1	95	0	9;181	0	n	0.0276188	5.89188	up	ENSG00000104687.12
cassetteExon	known_NIR_14132	chr8	85217502;85219360	85219323;85220306	-	85217502	85220306	ENST00000619594.4	known	0.16	56.5	306	83;30	306	y	0.14	66	421	102;30	421	y	0.15	87.5	490	117;58	490	y	0.17	54.5	268	75;34	268	y	0.18	62	284	96;28	284	y	0.18	68	316	72;64	316	y	0.0248175	4	up	ENSG00000176731.11
cassetteExon	novel_NIR_5423	chr11	31463305;31469797	31469718;31473724	-	31463305	31473724	ENST00000278200.5	novel	0.78	7	2	0;14	2	n	0.65	7.5	4	4;11	4	y	0.63	13.5	8	2;25	8	y	0.85	16.5	3	3;30	3	y	1	7.5	0	0;15	0	n	1	13.5	0	0;27	0	n	0.0186432	3.83658	up	ENSG00000148950.9
cassetteExon	novel_NIR_5426	chr11	31463305;31469797	31469740;31473724	-	31463305	31473724	ENST00000278200.5	novel	0.85	11.5	2	9;14	2	y	0.73	11	4	11;11	4	y	0.77	26.5	8	28;25	8	y	0.91	32	3	34;30	3	y	1	24	0	33;15	0	y	1	20	0	13;27	0	y	0.0165369	4.03097	up	ENSG00000148950.9
cassetteExon	novel_NIR_5429	chr11	31463305;31469797	31469758;31473724	-	31463305	31473724	ENST00000278200.5	novel	0.86	12	2	10;14	2	y	0.69	9	4	7;11	4	y	0.72	21	8	17;25	8	y	0.87	20	3	10;30	3	y	1	14.5	0	14;15	0	y	1	19.5	0	12;27	0	y	0.044163	2.94174	up	ENSG00000148950.9
cassetteExon	novel_NIR_8516	chr12	89525796;89528182	89528111;89540108	+	89525796	89540108	ENST00000605233.2	novel	0.16	3.5	19	4;3	19	y	0.21	3.5	13	2;5	13	y	0.14	3.5	21	5;2	21	n	0.25	4	12	3;5	12	y	0.35	6	11	5;7	11	y	0.26	3.5	10	4;3	10	y	0.0454143	3.0697	up	ENSG00000270344.2
cassetteExon	novel_NIR_8700	chr13	110615647;110622366	110622216;110627439	+	110615647	110627439	ENST00000424185.6	novel	0.73	11	4	22;0	4	n	0.56	7.5	6	15;0	6	n	0.67	30.5	15	59;2	15	y	0.95	19	1	36;2	1	y	1	18	0	36;0	0	n	1	25.5	0	51;0	0	n	0.0145643	6.28651	up	ENSG00000213995.11
cassetteExon	novel_NIR_12081	chr16	28836122;28836485	28836449;28836751	+	28836122	28836751	ENST00000382686.8	novel	0.37	55	93	70;40	93	y	0.38	69.5	112	87;52	112	y	0.37	99.5	173	129;70	173	y	0.45	64.5	79	84;45	79	y	0.48	86	92	99;73	92	y	0.44	87	109	113;61	109	y	0.0148439	6.68153	up	ENSG00000168488.18
cassetteExon	novel_NIR_12083	chr16	28836122;28836490	28836449;28836751	+	28836122	28836751	ENST00000382686.8	novel	0.32	43.5	93	70;17	93	y	0.33	55.5	112	87;24	112	y	0.3	74	173	129;19	173	y	0.4	53	79	84;22	79	y	0.37	55	92	99;11	92	y	0.36	60	109	113;7	109	y	0.0187267	4.02492	up	ENSG00000168488.18
cassetteExon	novel_NIR_12088	chr16	28836176;28836485	28836449;28836751	+	28836176	28836751	ENST00000325215.10	novel	0.5	22	22	4;40	22	y	0.48	30	33	8;52	33	y	0.52	37.5	34	5;70	34	y	0.59	27	19	9;45	19	y	0.58	42	30	11;73	30	y	0.57	35.5	27	10;61	27	y	0.00897069	6.19677	up	ENSG00000168488.18
cassetteExon	novel_NIR_17879	chr19	53432028;53433750	53433580;53441796	+	53432028	53441796	ENST00000424846.3	novel	0.33	3.5	7	5;2	7	y	0.33	3	6	4;2	6	y	0.33	7	14	12;2	14	y	1	8	0	12;4	0	y	0.8	12	3	19;5	3	y	1	8	0	15;1	0	n	0.0119905	9.05	up	ENSG00000241015.2
cassetteExon	novel_NIR_18111	chr19	57858983;57875226	57875156;57888767	-	57858983	57888767	ENST00000595295.1	novel	0.36	4	7	8;0	7	n	0.5	4	4	3;5	4	y	0.67	4	2	2;6	2	y	1	1.5	0	0;3	0	n	1	3.5	0	4;3	0	y	1	2	0	1;3	0	n	0.0318676	5.46699	up	ENSG00000204514.9
cassetteExon	novel_NIR_31850	chr8	25446250;25450481	25450380;25458199	-	25446250	25458199	ENST00000221200.8	novel	0	0	11	0;0	11	n	0	0	11	0;0	11	n	0.07	1	14	0;2	14	n	0.14	1.5	9	0;3	9	n	0.33	0.5	1	0;1	1	n	0.33	3.5	7	2;5	7	y	0.048073	3.60521	up	ENSG00000104756.15
ES	known_NIR_336	chr1	150577491	150578843	-	150577491;150578491	150578244;150578843	ENST00000620947.4	known	0.08	16	196	16	199;193	y	0.08	10	115	10	120;110	y	0.06	16	248	16	222;274	y	0.03	5	186	5	175;197	y	0.02	4	156.5	4	194;119	y	0.02	3	190.5	3	202;179	y	0.00719274	-6.7082	down	ENSG00000143384.12
ES	known_NIR_729	chr1	16986358	16986805	-	16986358;16986632	16986463;16986805	ENST00000326735.12	known	0.31	62	140.5	62	86;195	y	0.33	117	232.5	117	149;316	y	0.31	121	264	121	176;352	y	0.26	58	162.5	58	106;219	y	0.27	101	269	101	170;368	y	0.29	105	251	105	168;334	y	0.0197794	-3.91965	down	ENSG00000159363.17
ES	known_NIR_972	chr1	224365991	224375795	+	224365991;224371423	224371283;224375795	ENST00000465271.5	known	0.07	141	1859	141	1616;2102	y	0.06	138	2144	138	1887;2401	y	0.07	199	2807	199	2427;3187	y	0.04	79	1892	79	1757;2027	y	0.04	87	1847	87	1582;2112	y	0.05	124	2178	124	1982;2374	y	0.0077626	-4.94975	down	ENSG00000143771.11
ES	known_NIR_1562	chr1	9877989	9910095	-	9877989;9883738	9883705;9910095	ENST00000377263.5	known	0.9	36	4	36	4;4	y	0.83	48	10	48	14;6	y	0.89	43	5.5	43	8;3	y	0.72	31	12	31	14;10	y	0.7	33	14	33	16;12	y	0.8	41	10	41	11;9	y	0.028052	-3.54943	down	ENSG00000178585.14
ES	known_NIR_2085	chr11	118094855	118103101	+	118094855;118099098	118098985;118103101	ENST00000618855.4	known	0.06	7	104.5	7	99;110	y	0.06	6	94.5	6	106;83	y	0.04	7	168.5	7	147;190	y	0.02	2	104	2	93;115	y	0.01	2	144.5	2	144;145	y	0.03	4	138.5	4	141;136	y	0.0201689	-3.77964	down	ENSG00000137648.16
ES	known_NIR_2183	chr11	134248484	134249167	-	134248484;134248959	134248809;134249167	ENST00000392595.6	known	0.39	187	296	187	272;320	y	0.41	285	408	285	452;364	y	0.4	370	556	370	478;634	y	0.34	163	321	163	315;327	y	0.37	204	348.5	204	330;367	y	0.35	224	410	224	408;412	y	0.0159022	-4.42719	down	ENSG00000151500.14
ES	known_NIR_2207	chr11	18532487	18536406	-	18532487;18534453	18534330;18536406	ENST00000396197.7	known	0.42	5	7	5	7;7	y	0.3	3	7	3	8;6	y	0.34	8	15.5	8	12;19	y	0	0	9.5	0	9;10	n	0	0	10.5	0	7;14	n	0.08	1	11.5	1	16;7	n	0.00236008	-7.38703	down	ENSG00000151116.16
ES	known_NIR_3010	chr11	85628688	85631687	+	85628688;85631316	85631145;85631687	ENST00000393375.5	known	0.77	225	68.5	225	70;67	y	0.75	234	76	234	62;90	y	0.74	359	123	359	123;123	y	0.7	212	91	212	68;114	y	0.71	182	74	182	82;66	y	0.73	238	86.5	238	93;80	y	0.0326779	-3.20713	down	ENSG00000171204.12
ES	known_NIR_3036	chr11	884169	899340	-	884169;893519	893427;899340	ENST00000454838.6	known	0.1	42	379.5	42	318;441	y	0.1	53	463	53	429;497	y	0.1	65	612.5	65	553;672	y	0.06	30	476.5	30	411;542	y	0.08	49	558.5	49	462;655	y	0.06	30	499	30	439;559	y	0.0377496	-5	down	ENSG00000177830.17
ES	known_NIR_3341	chr12	133192003	133202144	+	133192003;133193533	133193428;133202144	ENST00000540096.2	known	0.74	14	5	14	3;7	y	0.75	12	4	12	2;6	y	0.55	8	6.5	8	3;10	y	0.25	2	6	2	7;5	y	0	0	6	0	5;7	n	0.41	6	8.5	6	4;13	y	0.0410005	-3.38504	down	ENSG00000256825.4
ES	known_NIR_3603	chr12	54371096	54373973	-	54371096;54371715	54371473;54373973	ENST00000551109.5	known	0.06	2	33.5	2	41;26	y	0.09	3	29	3	35;23	y	0.04	2	46	2	65;27	y	0	0	36	0	39;33	n	0	0	36	0	40;32	n	0	0	41.5	0	40;43	n	0.0488103	-4.3589	down	ENSG00000161642.17
ES	known_NIR_3903	chr12	9655979	9656921	+	9655979;9656649	9656568;9656921	ENST00000633848.1	known	0.75	12	4	12	8;0	n	0.81	24	5.5	24	6;5	y	0.88	14	2	14	4;0	n	0.67	2	1	2	0;2	n	0.61	7	4.5	7	4;5	y	0.73	8	3	8	4;2	y	0.0489252	-2.80501	down	ENSG00000256594.7
ES	known_NIR_4541	chr14	68878523	68879962	-	68878523;68879069	68878989;68879962	ENST00000394419.8	known	0.01	8	604	8	4;1204	y	0.02	11	548	11	7;1089	y	0.02	18	915	18	12;1818	y	0	2	660	2	3;1317	y	0	0	781.5	0	5;1558	n	0.01	4	762	4	4;1520	y	0.0474207	-2.82843	down	ENSG00000072110.13
ES	known_NIR_4620	chr14	74942733	74946379	-	74942733;74946275	74946213;74946379	ENST00000555567.5	known	0.8	4	1	4	0;2	n	0.64	7	4	7	5;3	y	0.62	5	3	5	4;2	y	0	0	7.5	0	6;9	n	0.29	1	2.5	1	2;3	n	0.27	2	5.5	2	4;7	y	0.015926	-4.56647	down	ENSG00000119630.13
ES	known_NIR_5095	chr15	75621056	75625666	-	75621056;75622490	75622342;75625666	ENST00000567134.5	known	0.89	24	3	24	4;2	y	0.93	14	1	14	2;0	n	0.95	37	2	37	4;0	n	0.88	11	1.5	11	3;0	n	0.8	16	4	16	8;0	n	0.81	17	4	17	8;0	n	0.0444582	-3.03703	down	ENSG00000169371.13
ES	known_NIR_5100	chr15	76292700	76311350	-	76292700;76295737	76295591;76311350	ENST00000557943.5	known	0.18	92	421	92	606;236	y	0.19	101	428	101	576;280	y	0.19	178	736.5	178	957;516	y	0.14	86	528.5	86	705;352	y	0.15	95	520	95	692;348	y	0.17	112	561	112	718;404	y	0.0493723	-3.53553	down	ENSG00000140374.15
ES	known_NIR_6320	chr17	39184864	39186496	-	39184864;39185150	39185131;39186496	ENST00000394303.7	known	1	1	0	1	0;0	n	1	5	0	5	0;0	n	0.96	13	0.5	13	0;1	n	0.75	6	2	6	2;2	y	0.5	3	3	3	3;3	n	0.67	1	0.5	1	0;1	n	0.0386473	-4.62794	down	ENSG00000067191.15
ES	known_NIR_6411	chr17	42838205	42838945	+	42838205;42838799	42838731;42838945	ENST00000545225.5	known	0.04	29	652.5	29	669;636	y	0.05	30	597.5	30	625;570	y	0.04	38	939	38	1004;874	y	0.02	15	698	15	738;658	y	0.03	22	723.5	22	729;718	y	0.01	10	728.5	10	740;717	y	0.0356527	-3.5	down	ENSG00000131467.10
ES	known_NIR_6486	chr17	46038686	46039702	-	46038686;46039215	46039027;46039702	ENST00000574590.5	known	0.27	9	24	9	17;31	y	0.22	2	7	2	9;5	y	0.27	6	16.5	6	19;14	y	0	0	16	0	15;17	n	0.04	1	23	1	33;13	n	0	0	13	0	7;19	n	0.000459007	-11.2445	down	ENSG00000120071.12
ES	known_NIR_6556	chr17	50460872	50461633	+	50460872;50461370	50461242;50461633	ENST00000300441.8	known	0.27	15	41.5	15	31;52	y	0.21	11	41	11	25;57	y	0.21	15	55	15	52;58	y	0.14	9	54	9	34;74	y	0.12	7	49.5	7	38;61	y	0.18	17	78.5	17	88;69	y	0.0361112	-3.125	down	ENSG00000167107.12
ES	known_NIR_6728	chr17	72428298	72592203	-	72428298;72431224	72431128;72592203	ENST00000453722.6	known	0.52	22	20	22	22;18	y	0.56	20	15.5	20	21;10	y	0.51	43	41	43	54;28	y	0.44	22	27.5	22	25;30	y	0.41	15	21.5	15	27;16	y	0.42	21	28.5	21	24;33	y	0.00751564	-6.04743	down	ENSG00000227036.6
ES	known_NIR_7749	chr19	35259064	35266359	+	35259064;35262692	35262546;35266359	ENST00000602122.5	known	0.77	1459	442.5	1459	369;516	y	0.77	1658	483.5	1658	348;619	y	0.75	2302	749	2302	572;926	y	0.73	1674	609.5	1674	509;710	y	0.71	1859	765.5	1859	557;974	y	0.72	1932	762.5	1932	623;902	y	0.00838827	-4.91354	down	ENSG00000105699.16
ES	known_NIR_8076	chr19	44782491	44790004	+	44782491;44784401	44784264;44790004	ENST00000270279.7	known	0.23	134	447.5	134	359;536	y	0.23	173	570.5	173	514;627	y	0.25	224	687	224	595;779	y	0.19	131	542	131	444;640	y	0.18	131	604	131	485;723	y	0.19	142	604	142	517;691	y	0.00719274	-6.7082	down	ENSG00000142273.10
ES	known_NIR_8470	chr19	572701	579500	+	572701;578121	577774;579500	ENST00000333511.7	known	1	4192	2	4192	0;4	n	1	4204	0	4204	0;0	n	0.99	6057	74.5	6057	147;2	y	0.99	4513	65	4513	130;0	n	0.98	5279	82	5279	160;4	y	0.98	5047	92	5047	181;3	y	0.0474207	-2.82843	down	ENSG00000172270.18
ES	known_NIR_8959	chr2	202552888	202559696	+	202552888;202556531	202555252;202559696	ENST00000374580.8	known	0.11	8	63	8	23;103	y	0.12	8	59	8	15;103	y	0.13	11	76.5	11	22;131	y	0.06	4	67.5	4	43;92	y	0.06	5	72.5	5	43;102	y	0.07	5	71	5	37;105	y	0.00266492	-8.5	down	ENSG00000204217.12
ES	known_NIR_8988	chr2	207726876	207737411	+	207726876;207734047	207733947;207737411	ENST00000392209.7	known	0.09	4	40.5	4	29;52	y	0.07	3	42	3	40;44	y	0.09	8	78.5	8	82;75	y	0	0	58	0	56;60	n	0.02	1	52.5	1	59;46	n	0.03	2	64.5	2	55;74	y	0.00478615	-6.03023	down	ENSG00000163249.9
ES	known_NIR_9079	chr2	230416328	230442937	+	230416328;230417665	230417591;230442937	ENST00000264052.9	known	0.24	10	32.5	10	32;33	y	0.26	7	20	7	20;20	y	0.24	16	52	16	40;64	y	0.13	6	41.5	6	26;57	y	0.05	2	39.5	2	38;41	y	0	0	39.5	0	35;44	n	0.0353525	-4.85582	down	ENSG00000067066.16
ES	known_NIR_9126	chr2	237527516	237540348	+	237527516;237534647	237534564;237540348	ENST00000264605.7	known	0.9	219	25	219	24;26	y	0.88	213	29	213	27;31	y	0.88	340	48	340	45;51	y	0.85	269	46.5	269	39;54	y	0.86	294	48.5	294	43;54	y	0.86	302	47.5	302	33;62	y	0.0285958	-4.02492	down	ENSG00000115648.13
ES	known_NIR_10441	chr22	36254999	36257319	+	36254999;36257136	36257083;36257319	ENST00000397278.7	known	0.21	6	23	6	26;20	y	0.14	2	12	2	9;15	y	0.18	6	27.5	6	24;31	y	0	0	40.5	0	39;42	n	0	0	31.5	0	30;33	n	0	0	25	0	31;19	n	0.0129173	-8.71315	down	ENSG00000100342.20
ES	known_NIR_10511	chr22	41532157	41540699	-	41532157;41532745	41532659;41540699	ENST00000396504.6	known	0.05	5	105	5	142;68	y	0.03	4	126.5	4	168;85	y	0.07	13	182.5	13	239;126	y	0	0	137.5	0	196;79	n	0	0	164	0	220;108	n	0	0	164.5	0	226;103	n	0.0494136	-4.33013	down	ENSG00000100413.16
ES	known_NIR_10686	chr3	12288020	12379704	+	12288020;12312453	12312380;12379704	ENST00000309576.10	known	0.33	7	14	7	6;22	y	0.39	12	19	12	13;25	y	0.34	16	30.5	16	26;35	y	0.3	11	26	11	14;38	y	0.23	10	34	10	29;39	y	0.28	8	20.5	8	19;22	y	0.0410858	-2.98807	down	ENSG00000132170.19
ES	known_NIR_10790	chr3	13483564	13502884	+	13483564;13501933	13501871;13502884	ENST00000402271.5	known	0.17	8	40	8	8;72	y	0.24	9	29	9	3;55	y	0.23	14	47.5	14	9;86	y	0	0	51.5	0	21;82	n	0	0	42.5	0	2;83	n	0	0	62.5	0	17;108	n	0.0103356	-9.75991	down	ENSG00000163517.14
ES	known_NIR_11055	chr3	33402904	33409236	-	33402904;33408797	33408690;33409236	ENST00000283629.7	known	0.72	17	6.5	17	7;6	y	0.67	12	6	12	6;6	y	0.66	43	22	43	22;22	y	0.64	23	13	23	13;13	y	0.57	13	10	13	14;6	y	0.6	15	10	15	7;13	y	0.0440725	-2.91043	down	ENSG00000153560.11
ES	known_NIR_11112	chr3	43598666	43605714	-	43598666;43600581	43600384;43605714	ENST00000292246.7	known	0.21	6	22.5	6	24;21	y	0.09	2	20.5	2	20;21	y	0.14	6	37	6	44;30	y	0	0	23	0	27;19	n	0	0	20.5	0	19;22	n	0.07	2	27.5	2	37;18	y	0.0499162	-2.94356	down	ENSG00000160746.12
ES	known_NIR_11204	chr3	49362626	49375434	-	49362626;49368548	49368428;49375434	ENST00000418115.5	known	0.07	131	1822.5	131	2325;1320	y	0.07	119	1675	119	2215;1135	y	0.06	154	2622	154	3238;2006	y	0.05	91	1840	91	2279;1401	y	0.05	97	1859	97	2374;1344	y	0.05	102	1840.5	102	2116;1565	y	0.0377496	-5	down	ENSG00000067560.10
ES	known_NIR_11773	chr4	88277243	88284406	-	88277243;88278642	88278144;88284406	ENST00000608933.5	known	0.77	5	1.5	5	0;3	n	0.73	8	3	8	6;0	n	0.48	6	6.5	6	4;9	y	0.31	2	4.5	2	5;4	y	0.18	2	9	2	12;6	y	0.4	3	4.5	3	5;4	y	0.0359105	-3.27459	down	ENSG00000163644.14
ES	known_NIR_11872	chr5	132218644	132227790	-	132218644;132227221	132226697;132227790	ENST00000401867.5	known	0.84	74	14.5	74	13;16	y	0.93	56	4	56	0;8	n	0.86	85	14	85	11;17	y	0.72	34	13	34	9;17	y	0.78	43	12	43	14;10	y	0.77	63	18.5	63	15;22	y	0.0273539	-3.63655	down	ENSG00000072682.18
ES	known_NIR_12235	chr5	37309267	37314198	-	37309267;37310743	37310552;37314198	ENST00000231498.7	known	0.13	7	48.5	7	39;58	y	0.09	4	42	4	52;32	y	0.11	13	101.5	13	124;79	y	0	0	52.5	0	52;53	n	0	0	48.5	0	42;55	n	0	0	48.5	0	45;52	n	0.0108404	-9.52628	down	ENSG00000113569.15
ES	known_NIR_12399	chr5	95652331	95654061	+	95652331;95653214	95653117;95654061	ENST00000380005.8	known	0.36	9	16	9	17;15	y	0.28	7	18	7	14;22	y	0.4	19	29	19	16;42	y	0.18	5	23.5	5	16;31	y	0.25	3	9	3	4;14	y	0.21	6	22.5	6	13;32	y	0.0425563	-3.27693	down	ENSG00000175449.13
ES	known_NIR_12430	chr6	10749268	10755142	+	10749268;10751234	10751133;10755142	ENST00000612333.4	known	0.03	14	421	14	0;842	n	0.03	14	511	14	0;1022	n	0.02	13	685.5	13	2;1369	y	0.01	3	448	3	0;896	n	0.02	10	450.5	10	0;901	n	0.01	8	543	8	0;1086	n	0.0474207	-2.82843	down	ENSG00000137210.13
ES	known_NIR_12589	chr6	169776065	169779182	+	169776065;169776673	169776455;169779182	ENST00000392095.8	known	0.22	21	73	21	76;70	y	0.18	15	66.5	15	61;72	y	0.2	20	79	20	97;61	y	0.14	11	69.5	11	70;69	y	0.14	9	55	9	76;34	y	0.14	11	70	11	63;77	y	0.0350987	-5.19615	down	ENSG00000130023.15
ES	known_NIR_13459	chr7	44841012	44847969	-	44841012;44843354	44843277;44847969	ENST00000222690.10	known	0.11	87	698.5	87	908;489	y	0.11	97	808.5	97	1022;595	y	0.1	119	1114	119	1421;807	y	0.07	55	699	55	854;544	y	0.08	59	700	59	897;503	y	0.09	81	777	81	956;598	y	0.0248175	-4	down	ENSG00000105968.18
ES	known_NIR_13619	chr7	76990369	77000309	+	76990369;76995595	76995455;77000309	ENST00000425797.2	known	0.44	47	59	47	56;62	y	0.41	35	49.5	35	47;52	y	0.42	55	76.5	55	78;75	y	0.33	33	68	33	82;54	y	0.31	41	90.5	41	114;67	y	0.33	36	73	36	70;76	y	0.00114774	-9.04534	down	ENSG00000186704.9
ES	known_NIR_13947	chr8	22589741	22593733	+	22589741;22591668	22591551;22593733	ENST00000339162.11	known	0.1	24	220	24	204;236	y	0.12	34	243.5	34	260;227	y	0.1	42	358	42	390;326	y	0.07	19	240	19	260;220	y	0.06	18	299.5	18	338;261	y	0.07	23	296.5	23	331;262	y	0.0133217	-5.36656	down	ENSG00000120913.23
ES	known_NIR_14125	chr8	81715114	81718182	-	81715114;81717288	81717249;81718182	ENST00000523096.5	known	0.61	43	28	43	31;25	y	0.56	32	25.5	32	29;22	y	0.56	48	37.5	48	38;37	y	0.44	36	46.5	36	45;48	y	0.51	22	21.5	22	19;24	y	0.44	19	24.5	19	27;22	y	0.0203415	-3.95242	down	ENSG00000104231.10
ES	known_NIR_14435	chr9	152078	156481	-	152078;154795	154709;156481	ENST00000356521.8	known	0.1	19	173	19	185;161	y	0.13	15	103	15	105;101	y	0.1	25	219.5	25	243;196	y	0.04	4	102	4	116;88	y	0.05	5	88	5	88;88	y	0.06	9	147.5	9	159;136	y	0.0117745	-5.19615	down	ENSG00000172785.18
ES	novel_NIR_1017	chr1	159937838	159943397	-	159937838;159943151	159942963;159943397	ENST00000361509.7	novel	0.2	1	4	1	2;6	n	0.09	1	10.5	1	11;10	n	0.15	4	23	4	20;26	y	0	0	14	0	15;13	n	0	0	20	0	14;26	n	0	0	25.5	0	20;31	n	0.04393	-4.61245	down	ENSG00000085552.16
ES	novel_NIR_1652	chr1	209622680	209623505	-	209622680;209623179	209622982;209623505	ENST00000356082.8	novel	0.14	46	279.5	46	285;274	n	0.14	47	282.5	47	272;293	n	0.16	83	427	83	428;426	y	0.11	47	362.5	47	351;374	n	0.1	41	376.5	41	343;410	n	0.1	45	402.5	45	405;400	n	0.0107001	-5.81378	down	ENSG00000196878.12
ES	novel_NIR_4096	chr10	42632024	42636920	-	42632024;42632439	42632295;42636920	ENST00000359467.7	novel	0.2	6	24	6	19;29	y	0.39	14	22	14	26;18	y	0.29	9	22.5	9	13;32	y	0	0	17.5	0	6;29	n	0.05	1	17.5	1	12;23	n	0	0	17	0	22;12	n	0.0286565	-4.82428	down	ENSG00000196693.14
ES	novel_NIR_5608	chr11	45219757	45225995	+	45219757;45224843	45224217;45225995	ENST00000622142.4	novel	0.8	4	1	4	2;0	y	-	-	-	-	-	-	1	4	0	4	0;0	y	0.2	1	4	1	8;0	n	0	0	1.5	0	3;0	n	-	-	-	-	-	-	0.0298575	-5.65685	down	ENSG00000019485.12
ES	novel_NIR_5630	chr11	46494204	46541945	-	46494204;46508370	46508191;46541945	ENST00000533727.5	novel	0.22	4	14.5	4	16;13	y	0.17	2	9.5	2	11;8	y	0.18	4	18	4	24;12	y	0	0	14	0	12;16	n	0.06	1	14.5	1	21;8	n	0.08	2	23.5	2	22;25	n	0.0112102	-5.03277	down	ENSG00000110497.14
ES	novel_NIR_6836	chr12	102182627	102195951	+	102182627;102195447	102195312;102195951	ENST00000541394.5	novel	0.6	9	6	9	9;3	y	0.83	5	1	5	2;0	y	0.76	16	5	16	7;3	y	0.53	8	7	8	9;5	y	0.43	3	4	3	8;0	y	0.33	1	2	1	0;4	n	0.0294348	-3.36111	down	ENSG00000185480.11
ES	novel_NIR_7283	chr12	123974020	124011381	+	123974020;123988138	123988043;124011381	ENST00000337815.8	novel	0.13	3	19.5	3	18;21	n	0.21	2	7.5	2	8;7	y	0.12	2	15	2	13;17	n	0	0	14	0	14;14	n	0	0	10.5	0	10;11	n	0	0	17.5	0	16;19	n	0.0328106	-5.38389	down	ENSG00000179195.15
ES	novel_NIR_7284	chr12	123974020	124011381	+	123974020;123988138	123988046;124011381	ENST00000392404.7	novel	0.16	3	16	3	11;21	y	0.15	2	11	2	15;7	y	0.15	2	11.5	2	6;17	y	0	0	12.5	0	11;14	n	0	0	6	0	1;11	n	0	0	11.5	0	4;19	n	0.000472255	-46	down	ENSG00000179195.15
ES	novel_NIR_8506	chr12	89421257	89459638	-	89421257;89425379	89425161;89459638	ENST00000393179.8	novel	0.11	1	8	1	8;8	n	0.15	2	11	2	10;12	y	0.17	4	20	4	27;13	y	0	0	10.5	0	12;9	n	0	0	16	0	26;6	n	0	0	7.5	0	6;9	n	0.0148078	-8.12624	down	ENSG00000139323.13
ES	novel_NIR_15444	chr17	8265125	8265556	+	8265125;8265468	8265288;8265556	ENST00000314666.10	novel	0.15	4	22	4	24;20	y	0.29	6	15	6	17;13	y	0.17	7	33.5	7	27;40	y	0.02	1	40.5	1	50;31	n	0.04	1	23.5	1	37;10	n	0	0	24.5	0	31;18	n	0.0446473	-4.05465	down	ENSG00000178921.13
ES	novel_NIR_16096	chr19	12899385	12900460	-	12899385;12900120	12900004;12900460	ENST00000293695.7	novel	0.52	8	7.5	8	5;10	y	0.61	18	11.5	18	7;16	y	0.63	12	7	12	7;7	y	0.4	10	15	10	11;19	y	0.51	9	8.5	9	9;8	y	0.45	9	11	9	11;11	y	0.0455909	-2.87183	down	ENSG00000161860.7
ES	novel_NIR_16256	chr19	17175741	17183829	+	17175741;17181040	17180927;17183829	ENST00000595618.5	novel	1	4	0	4	0;0	y	1	2	0	2	0;0	y	0.53	4	3.5	4	2;5	y	0	0	3	0	3;3	n	0	0	10	0	6;14	n	0	0	9.5	0	8;11	n	0.0328212	-5.38298	down	ENSG00000099331.13
ES	novel_NIR_16953	chr19	38405113	38408751	+	38405113;38405635	38405519;38408751	ENST00000343358.11	novel	0.24	2	6.5	2	6;7	y	0.16	3	16	3	0;32	y	0.19	2	8.5	2	0;17	y	0	0	9	0	1;17	n	0	0	6.5	0	0;13	n	0	0	13	0	6;20	n	0.013786	-8.42857	down	ENSG00000130244.12
ES	novel_NIR_19699	chr2	237769992	237772866	+	237769992;237772198	237772081;237772866	ENST00000308482.13	novel	0.17	5	24	5	25;23	y	0.26	7	20	7	11;29	y	0.14	5	30.5	5	17;44	n	0.09	2	21.5	2	20;23	n	0	0	16	0	18;14	n	0	0	14	0	18;10	n	0.0284054	-3.41121	down	ENSG00000124831.18
ES	novel_NIR_25337	chr4	118704051	118709998	+	118704051;118705821	118705611;118709998	ENST00000388822.9	novel	0.23	8	27	8	32;22	y	0.17	4	20	4	11;29	y	0.12	6	46	6	51;41	n	0.05	1	20	1	22;18	n	0	0	24	0	28;20	n	0	0	24	0	14;34	n	0.0219192	-4.36384	down	ENSG00000145388.14
ES	novel_NIR_26071	chr4	67701484	67728540	+	67701484;67721051	67720422;67728540	ENST00000500538.6	novel	0.86	15	2.5	15	5;0	y	0.74	17	6	17	12;0	y	0.67	23	11.5	23	23;0	y	0.43	5	6.5	5	13;0	y	0.52	8	7.5	8	15;0	y	0.35	3	5.5	3	11;0	y	0.0124174	-4.36424	down	ENSG00000248049.6
ES	novel_NIR_26593	chr5	134308466	134312292	-	134308466;134308727	134308574;134312292	ENST00000265334.8	novel	0.5	2	2	2	4;0	y	0.67	2	1	2	2;0	y	0.5	2	2	2	4;0	y	-	-	-	-	-	-	0	0	0.5	0	0;1	n	0	0	4	0	8;0	n	0.0102042	-9.82353	down	ENSG00000006837.11
ES	novel_NIR_27049	chr5	176348356	176359811	-	176348356;176359567	176359481;176359811	ENST00000533553.5	novel	0.29	8	20	8	9;31	y	0.36	6	10.5	6	6;15	y	0.31	11	24	11	10;38	y	0.24	6	18.5	6	5;32	y	0.21	6	23	6	4;42	y	0.19	3	13	3	8;18	y	0.0172794	-4.20181	down	ENSG00000122203.14
ES	novel_NIR_27158	chr5	179658481	179664323	+	179658481;179663103	179662975;179664323	ENST00000514793.1	novel	0.3	3	7	3	8;6	y	0.34	8	15.5	8	20;11	y	0.24	4	12.5	4	12;13	y	0.21	2	7.5	2	10;5	y	0.11	2	16.5	2	21;12	n	0.18	2	9	2	12;6	y	0.037964	-3.05223	down	ENSG00000250999.1
ES	novel_NIR_30033	chr7	151051095	151051810	+	151051095;151051319	151051172;151051810	ENST00000357922.8	novel	-	-	-	-	-	-	1	1	0	1	0;0	n	0.8	2	0.5	2	1;0	y	0	0	0.5	0	1;0	n	0.57	2	1.5	2	2;1	y	0	0	1	0	1;1	n	0.049584	-3.3068	down	ENSG00000213199.7
ES	novel_NIR_31368	chr8	127939676	127989162	+	127939676;127984204	127983904;127989162	ENST00000513868.6	novel	1	13	0	13	0;0	y	1	28	0	28	0;0	y	0.93	39	3	39	4;2	y	0.82	14	3	14	0;6	y	0.78	30	8.5	30	0;17	y	0.79	13	3.5	13	0;7	y	0.00640577	-6.85801	down	ENSG00000249859.7
ES	novel_NIR_32815	chr9	129489299	129493416	+	129489299;129491128	129490844;129493416	ENST00000608369.1	novel	0.44	2	2.5	2	5;0	y	1	3	0	3	0;0	y	0.75	3	1	3	2;0	y	0	0	3.5	0	3;4	n	0	0	2	0	2;2	n	-	-	-	-	-	-	0.0458671	-4.50709	down	ENSG00000204054.11
ES	novel_NIR_33184	chr9	34665767	34680906	+	34665767;34678268	34678100;34680906	ENST00000434627.1	novel	0.8	2	0.5	2	0;1	y	0.67	6	3	6	0;6	y	0.5	2	2	2	0;4	y	0	0	2.5	0	0;5	n	0	0	0.5	0	0;1	n	0	0	0.5	0	0;1	n	0.0170498	-7.56017	down	ENSG00000230074.1
ES	novel_NIR_33288	chr9	37770739	37777601	+	37770739;37776405	37776282;37777601	ENST00000377754.6	novel	0.16	6	32.5	6	24;41	y	0.09	2	20	2	14;26	n	0.08	2	23.5	2	33;14	n	0	0	33	0	37;29	n	0.04	1	27.5	1	30;25	n	0	0	27	0	34;20	n	0.0417814	-3.39419	down	ENSG00000165275.9
ES	novel_NIR_34342	chrX	40639128	40647305	-	40639128;40647141	40647007;40647305	ENST00000327877.9	novel	0.17	3	15	3	23;7	y	0.13	2	13.5	2	16;11	n	0.07	2	27	2	36;18	n	0	0	12	0	15;9	n	0.06	1	15.5	1	22;9	n	0	0	17	0	26;8	n	0.049663	-2.92922	down	ENSG00000185753.12
ES	known_NIR_394	chr1	151767299	151770172	+	151767299;151768233	151768058;151770172	ENST00000321531.9	known	0.32	4	8.5	4	4;13	y	0.15	2	11	2	11;11	y	0.2	4	16.5	4	17;16	y	0.51	10	9.5	10	12;7	y	0.42	4	5.5	4	0;11	n	0.5	4	4	4	0;8	n	0.0198876	4.37331	up	ENSG00000143450.14
ES	known_NIR_656	chr1	161159678	161160620	+	161159678;161160506	161160366;161160620	ENST00000368002.7	known	0.41	8	11.5	8	9;14	y	0.46	11	13	11	2;24	y	0.35	11	20	11	13;27	y	0.52	14	13	14	3;23	y	0.53	14	12.5	14	6;19	y	0.57	21	16	21	15;17	y	0.0348978	3.77964	up	ENSG00000143258.15
ES	known_NIR_840	chr1	197645743	197652235	-	197645743;197647114	197647055;197652235	ENST00000620048.4	known	0	0	4	0	4;4	n	0	0	3	0	2;4	n	0.33	3	6	3	8;4	y	-	-	-	-	-	-	1	2	0	2	0;0	n	1	2	0	2	0;0	n	0.0149345	8.09091	up	ENSG00000213047.11
ES	known_NIR_903	chr1	207767195	207767779	+	207767195;207767651	207767607;207767779	ENST00000358170.6	known	0.91	96	10	96	11;9	y	0.86	58	9.5	58	9;10	y	0.9	133	14	133	12;16	y	0.98	117	2	117	3;1	n	0.97	120	3.5	120	3;4	y	1	90	0	90	0;0	n	0.0111638	5.2915	up	ENSG00000117335.18
ES	known_NIR_1058	chr1	228147699	228148665	+	228147699;228148456	228148371;228148665	ENST00000366730.5	known	0.09	190	2023.5	190	1805;2242	y	0.09	265	2788.5	265	2496;3081	y	0.08	313	3786	313	3468;4104	y	0.1	273	2440	273	2298;2582	y	0.11	344	2699.5	344	2509;2890	y	0.1	343	2924.5	343	2691;3158	y	0.0241101	3.53553	up	ENSG00000143774.16
ES	known_NIR_1861	chr10	45773358	45778953	+	45773358;45777425	45777273;45778953	ENST00000540872.5	known	0.06	3	44	3	50;38	y	0.02	1	44.5	1	48;41	n	0	0	43	0	57;29	n	0.14	10	61	10	77;45	y	0.25	19	56.5	19	38;75	y	0.31	28	61	28	44;78	y	0.0411217	3.91341	up	ENSG00000172661.17
ES	known_NIR_1874	chr10	50113997	50119587	+	50113997;50118058	50117906;50119587	ENST00000351071.10	known	0.05	2	42	2	46;38	y	0.02	1	42.5	1	44;41	n	0	0	45	0	58;32	n	0.15	10	58	10	74;42	y	0.27	21	56	21	33;79	y	0.28	23	60.5	23	47;74	y	0.0269416	4.7488	up	ENSG00000099290.15
ES	known_NIR_2322	chr11	3808651	3823883	+	3808651;3811424	3811250;3823883	ENST00000463452.6	known	0.14	5	29.5	5	24;35	y	0.09	2	20	2	17;23	y	0.12	8	61	8	49;73	y	0.16	8	43.5	8	42;45	y	0.2	10	40.5	10	23;58	y	0.16	6	32.5	6	28;37	y	0.0457033	2.87352	up	ENSG00000148985.19
ES	known_NIR_2428	chr11	502249	507113	-	502249;504996	504824;507113	ENST00000354420.6	known	0.58	119	87.5	119	117;58	y	0.54	132	113.5	132	173;54	y	0.59	197	134.5	197	178;91	y	0.63	157	94	157	111;77	y	0.62	165	101	165	145;57	y	0.64	192	109.5	192	153;66	y	0.0453176	3.67423	up	ENSG00000023191.16
ES	known_NIR_2579	chr11	63905043	63908877	+	63905043;63906114	63906088;63908877	ENST00000361128.9	known	0.11	1	8	1	16;0	n	0	0	12.5	0	24;1	n	0.13	2	13.5	2	25;2	y	0.35	3	5.5	3	5;6	y	0.39	6	9.5	6	19;0	n	0.2	4	16.5	4	31;2	y	0.0351087	3.30719	up	ENSG00000072518.20
ES	known_NIR_2580	chr11	63905043	63908877	+	63905043;63908304	63908260;63908877	ENST00000377810.7	known	0.01	1	88	1	63;113	n	0	0	73.5	0	57;90	n	0.02	2	118	2	102;134	y	0.03	3	108.5	3	88;129	y	0.05	6	107	6	99;115	y	0.04	4	107	4	84;130	y	0.0213116	3.67423	up	ENSG00000072518.20
ES	known_NIR_2618	chr11	64318386	64320865	+	64318386;64319868	64319734;64320865	ENST00000352435.8	known	0.21	250	922	250	1674;170	y	0.2	280	1155	280	2060;250	y	0.2	379	1528.5	379	2759;298	y	0.23	320	1077.5	320	1959;196	y	0.22	314	1123.5	314	2025;222	y	0.22	336	1185.5	336	2184;187	y	0.0132356	4.24264	up	ENSG00000126432.13
ES	known_NIR_3229	chr12	121245240	121249787	-	121245240;121248734	121248606;121249787	ENST00000392474.6	known	0.24	5	16	5	20;12	y	0.2	4	16.5	4	19;14	y	0.2	6	24.5	6	18;31	y	0.31	4	9	4	9;9	y	0.35	8	15	8	12;18	y	0.29	10	25	10	18;32	y	0.0112697	4.67343	up	ENSG00000110931.18
ES	known_NIR_3307	chr12	124372610	124378237	-	124372610;124374463	124374413;124378237	ENST00000405201.5	known	0.33	2	4	2	6;2	y	0.45	7	8.5	7	8;9	y	0.29	5	12	5	14;10	y	0.59	11	7.5	11	11;4	y	0.48	5	5.5	5	8;3	y	0.7	7	3	7	2;4	y	0.0467507	2.92941	up	ENSG00000196498.13
ES	known_NIR_3645	chr12	56160320	56161387	+	56160320;56160670	56160626;56161387	ENST00000550697.5	known	0.62	14054	8786.5	14054	8779;8794	y	0.6	17992	11751	17992	11615;11887	y	0.61	22153	13872.5	22153	13650;14095	y	0.66	15725	8005.5	15725	7831;8180	y	0.66	17745	9253	17745	9084;9422	y	0.66	19216	9802	19216	9659;9945	y	0.0130725	8.66025	up	ENSG00000092841.18
ES	known_NIR_3722	chr12	62565380	62566322	+	62565380;62566031	62566014;62566322	ENST00000393630.7	known	0.26	6	17.5	6	17;18	y	0.33	1	2	1	2;2	n	0.18	4	18	4	17;19	y	0.72	9	3.5	9	2;5	y	0.5	4	4	4	4;4	y	0.57	4	3	4	2;4	y	0.0162838	4.35722	up	ENSG00000061987.14
ES	known_NIR_3759	chr12	6651385	6652662	-	6651385;6652418	6652271;6652662	ENST00000341550.8	known	0	0	65	0	57;73	n	0.02	2	86.5	2	90;83	y	0.02	2	86.5	2	74;99	y	0.03	2	68.5	2	65;72	y	0.06	6	94	6	84;104	y	0.06	4	63.5	4	55;72	y	0.0455407	3.05085	up	ENSG00000111653.19
ES	known_NIR_4001	chr13	42888502	42895009	-	42888502;42889242	42889211;42895009	ENST00000313640.11	known	0.78	230	63	230	64;62	y	0.79	235	64	235	59;69	y	0.8	317	77	317	76;78	y	0.82	253	56.5	253	61;52	y	0.81	235	53.5	235	55;52	y	0.83	279	55.5	279	56;55	y	0.0213116	3.67423	up	ENSG00000133106.14
ES	known_NIR_4092	chr14	100361921	100375283	-	100361921;100369258	100369087;100375283	ENST00000392882.6	known	0.07	8	112	8	177;47	y	0.04	3	82.5	3	134;31	y	0.05	8	147	8	250;44	y	0.12	16	122.5	16	205;40	y	0.12	10	73.5	10	117;30	y	0.12	14	99	14	171;27	y	0.0170536	7.55929	up	ENSG00000140105.17
ES	known_NIR_4420	chr14	49626048	49633287	-	49626048;49628155	49628012;49633287	ENST00000298292.12	known	0.36	30	52.5	30	54;51	y	0.37	20	34.5	20	25;44	y	0.31	31	70.5	31	80;61	y	0.44	47	60	47	52;68	y	0.49	54	56	54	44;68	y	0.4	43	65	43	65;65	y	0.0444831	3.02346	up	ENSG00000165506.14
ES	known_NIR_5305	chr16	18358588	18359948	-	18358588;18359451	18359382;18359948	ENST00000545114.5	known	0.52	337	307	337	323;291	y	0.53	339	297.5	339	294;301	y	0.56	517	406	517	418;394	y	0.62	390	237	390	242;232	y	0.62	446	273	446	280;266	y	0.65	458	250	458	293;207	y	0.00438413	5.96962	up	ENSG00000233024.7
ES	known_NIR_6640	chr17	59119495	59155131	-	59119495;59131367	59131281;59155131	ENST00000330137.11	known	0.11	27	229.5	27	242;217	y	0.08	18	198.5	18	190;207	y	0.11	40	330.5	40	345;316	y	0.21	59	217.5	59	245;190	y	0.16	41	215	41	213;217	y	0.17	54	261.5	54	293;230	y	0.0164051	4.38178	up	ENSG00000182628.12
ES	known_NIR_6944	chr17	78191060	78202703	+	78191060;78202603	78202499;78202703	ENST00000409257.9	known	0.16	14	74.5	14	90;59	y	0.13	11	72	11	82;62	y	0.17	22	105	22	132;78	y	0.22	18	64.5	18	68;61	y	0.28	28	73	28	100;46	y	0.3	33	76	33	88;64	y	0.0253389	4.21718	up	ENSG00000183077.15
ES	known_NIR_7723	chr19	3452666	3456550	+	3452666;3453916	3453763;3456550	ENST00000589123.5	known	0.64	17	9.5	17	12;7	y	0.63	18	10.5	18	11;10	y	0.52	32	30	32	48;12	y	0.72	27	10.5	27	12;9	y	0.76	34	10.5	34	12;9	y	0.77	36	11	36	17;5	y	0.042876	3.70679	up	ENSG00000141905.17
ES	known_NIR_7753	chr19	35266532	35266839	+	35266532;35266738	35266679;35266839	ENST00000602122.5	known	0	0	1299	0	2146;452	n	0.01	18	1571.5	18	2617;526	y	0	0	2035	0	3464;606	n	0.02	23	1491	23	2466;516	y	0.01	10	1808.5	10	3085;532	y	0.02	40	1893.5	40	3155;632	y	0.0474207	2.82843	up	ENSG00000105699.16
ES	known_NIR_8262	chr19	49660828	49662425	-	49660828;49662328	49661948;49662425	ENST00000377135.8	known	0.12	105	779	105	688;870	y	0.13	152	1057.5	152	981;1134	y	0.12	188	1407.5	188	1242;1573	y	0.14	153	980	153	855;1105	y	0.14	184	1109.5	184	1024;1195	y	0.14	173	1099.5	173	988;1211	y	0.0377496	5	up	ENSG00000126456.15
ES	known_NIR_8301	chr19	49668937	49673698	+	49668937;49669115	49669024;49673698	ENST00000594157.5	known	0.03	14	481.5	14	804;159	y	0.02	14	689.5	14	1151;228	y	0.04	35	842	35	1388;296	y	0.08	52	617.5	52	990;245	y	0.06	37	620.5	37	1046;195	y	0.05	40	714.5	40	1184;245	y	0.0419145	3.16228	up	ENSG00000126453.9
ES	known_NIR_8574	chr19	805187	806408	+	805187;805569	805492;806408	ENST00000356948.10	known	0.17	72	361	72	347;375	y	0.17	72	350	72	354;346	y	0.19	128	555	128	614;496	y	0.25	137	401.5	137	446;357	y	0.22	124	438	124	451;425	y	0.23	126	425.5	126	462;389	y	0.00830343	5.12569	up	ENSG00000011304.16
ES	known_NIR_9035	chr2	219207421	219207887	+	219207421;219207779	219207648;219207887	ENST00000409206.5	known	0	0	93	0	54;132	n	0	0	152	0	99;205	n	0.05	9	172	9	103;241	y	0.09	12	115	12	70;160	y	0.09	12	124.5	12	101;148	y	0.07	12	152.5	12	111;194	y	0.0424792	3.71391	up	ENSG00000158552.12
ES	known_NIR_9099	chr2	232567214	232580904	+	232567214;232574341	232574263;232580904	ENST00000409514.5	known	0.52	21	19.5	21	25;14	y	0.56	32	25	32	30;20	y	0.57	43	32.5	43	34;31	y	0.64	57	32	57	37;27	y	0.63	49	28.5	49	31;26	y	0.62	52	32.5	52	42;23	y	0.0233392	4.89898	up	ENSG00000135930.13
ES	known_NIR_9715	chr20	36198041	36212272	+	36198041;36209898	36209488;36212272	ENST00000202028.9	known	0.46	56	67	56	49;85	y	0.49	53	56	53	37;75	y	0.42	82	115.5	82	64;167	y	0.59	94	64.5	94	36;93	y	0.56	93	73.5	93	59;88	y	0.62	102	61.5	102	31;92	y	0.00797658	5	up	ENSG00000088367.20
ES	known_NIR_10142	chr21	44235562	44238448	-	44235562;44237217	44236867;44238448	ENST00000344330.8	known	0	0	5	0	6;4	n	0	0	8	0	16;0	n	0	0	11.5	0	16;7	n	0.28	4	10.5	4	20;1	n	0.27	4	11	4	20;2	y	0.4	6	9	6	16;2	y	0.016955	7.58183	up	ENSG00000160223.16
ES	known_NIR_10185	chr21	5025049	5027935	+	5025049;5026630	5026280;5027935	ENST00000612610.4	known	0	0	5	0	4;6	n	0	0	8	0	0;16	n	0	0	11.5	0	7;16	n	0.28	4	10.5	4	1;20	n	0.27	4	11	4	2;20	y	0.4	6	9	6	2;16	y	0.016955	7.58183	up	ENSG00000277117.4
ES	known_NIR_10740	chr3	129288997	129298354	+	129288997;129290804	129290679;129298354	ENST00000383463.8	known	0.03	6	205.5	6	160;251	y	0.11	24	193	24	143;243	y	0.12	43	307.5	43	246;369	y	0.2	47	191	47	151;231	y	0.16	38	202	38	157;247	y	0.24	64	204.5	64	134;275	y	0.0386482	3.09091	up	ENSG00000183624.13
ES	known_NIR_11828	chr5	115832664	115841390	-	115832664;115837764	115837628;115841390	ENST00000509910.1	known	0.04	15	343.5	15	340;347	y	0.06	23	333.5	23	324;343	y	0.04	20	490	20	464;516	y	0.11	39	308	39	271;345	y	0.08	23	251	23	249;253	y	0.1	36	338.5	36	343;334	y	0.0125409	4.52267	up	ENSG00000145782.12
ES	known_NIR_12162	chr5	179614959	179616126	-	179614959;179615595	179615546;179616126	ENST00000393432.8	known	0.14	221	1368	221	1399;1337	y	0.16	247	1279	247	1359;1199	y	0.14	355	2201	355	2281;2121	y	0.17	277	1354	277	1380;1328	y	0.19	318	1381.5	318	1464;1299	y	0.17	306	1498.5	306	1602;1395	y	0.0334717	3.18198	up	ENSG00000169045.17
ES	known_NIR_12385	chr5	88282866	88285741	+	88282866;88283086	88283010;88285741	ENST00000506584.5	known	0.44	4	5	4	1;9	n	0.53	5	4.5	5	2;7	y	0.54	7	6	7	7;5	y	0.74	7	2.5	7	5;0	n	0.71	11	4.5	11	4;5	y	0.67	7	3.5	7	2;5	y	0.00901809	5.39169	up	ENSG00000247828.7
ES	known_NIR_12682	chr6	30557450	30561834	+	30557450;30558212	30558150;30561834	ENST00000376560.7	known	0.17	7	35	7	63;7	y	0.16	11	57.5	11	103;12	y	0.2	19	78	19	131;25	y	0.31	18	40.5	18	73;8	y	0.44	30	38	30	69;7	y	0.35	15	27.5	15	51;4	y	0.0295449	4.71735	up	ENSG00000204576.11
ES	known_NIR_12719	chr6	31639226	31640199	-	31639226;31639646	31639500;31640199	ENST00000375976.8	known	0.51	283	270.5	283	192;349	y	0.53	402	350	402	231;469	y	0.5	433	426.5	433	295;558	y	0.57	340	261.5	340	185;338	y	0.59	489	341.5	489	252;431	y	0.59	454	318	454	220;416	y	0.0040449	6.33174	up	ENSG00000204463.12
ES	known_NIR_12826	chr6	35293044	35294456	+	35293044;35293915	35293751;35294456	ENST00000373953.7	known	0.23	4	13.5	4	17;10	y	0.29	6	14.5	6	10;19	y	0.26	5	14.5	5	14;15	y	0.41	13	19	13	29;9	y	0.43	13	17.5	13	13;22	y	0.37	9	15.5	9	14;17	y	0.00440435	5.79812	up	ENSG00000065029.14
ES	known_NIR_12862	chr6	41067437	41070076	-	41067437;41068953	41068841;41070076	ENST00000479950.5	known	0.06	13	187.5	13	177;198	y	0.05	7	144	7	171;117	y	0.09	24	235	24	256;214	y	0.1	21	184.5	21	190;179	y	0.12	20	143.5	20	144;143	y	0.14	27	165	27	176;154	y	0.0329754	3.2	up	ENSG00000124596.16
ES	known_NIR_13818	chr8	141427069	141430927	+	141427069;141427824	141427750;141430927	ENST00000521578.5	known	0	0	33	0	38;28	n	0.07	4	54.5	4	56;53	y	0	0	47.5	0	51;44	n	0.14	5	31	5	37;25	y	0.12	4	28.5	4	34;23	y	0.25	7	21.5	7	20;23	y	0.0472114	3.14286	up	ENSG00000184489.11
ES	known_NIR_14032	chr8	47779093	47782378	-	47779093;47782254	47782162;47782378	ENST00000314191.6	known	0	0	159.5	0	208;111	n	0.02	3	120	3	132;108	y	0	0	228	0	263;193	n	0.05	9	174.5	9	196;153	y	0.07	10	132	10	144;120	y	0.07	13	168	13	182;154	y	0.00385795	6.01041	up	ENSG00000253729.7
ES	known_NIR_14650	chrX	103677051	103685171	-	103677051;103678600	103678499;103685171	ENST00000360458.5	known	0.2	68	274	68	420;128	y	0.18	48	214.5	48	329;100	y	0.2	104	404.5	104	635;174	y	0.24	107	333	107	525;141	y	0.25	92	274.5	92	432;117	y	0.24	95	293.5	95	453;134	y	0.00719274	6.7082	up	ENSG00000123562.16
ES	known_NIR_14651	chrX	103677051	103685171	-	103677051;103678651	103678499;103685171	ENST00000422154.6	known	0.19	68	299	68	420;178	y	0.17	48	233.5	48	329;138	y	0.19	104	438	104	635;241	y	0.23	107	361.5	107	525;198	y	0.24	92	298.5	92	432;165	y	0.23	95	312	95	453;171	y	0.00719274	6.7082	up	ENSG00000123562.16
ES	novel_NIR_607	chr1	151324917	151327271	-	151324917;151326373	151326172;151327271	ENST00000368872.5	novel	0	0	8.5	0	0;17	n	0.2	1	4	1	2;6	n	0	0	16	0	6;26	n	0.29	3	7.5	3	5;10	y	0.53	4	3.5	4	0;7	y	0.36	4	7	4	2;12	y	0.028825	3.34762	up	ENSG00000143393.16
ES	novel_NIR_1117	chr1	16232646	16233612	-	16232646;16233017	16232893;16233612	ENST00000375599.7	novel	0.32	6	12.5	6	8;17	y	0.2	3	12	3	12;12	y	0.11	3	24	3	32;16	n	0.51	11	10.5	11	11;10	y	0.42	4	5.5	4	9;2	y	0.47	7	8	7	8;8	y	0.0363504	3.8792	up	ENSG00000132881.11
ES	novel_NIR_1541	chr1	204223585	204228728	-	204223585;204228228	204228083;204228728	ENST00000272203.7	novel	0.07	3	39	3	37;41	n	0.05	2	42	2	45;39	n	0.01	1	76	1	71;81	n	0.15	8	46.5	8	41;52	y	0.09	6	63	6	57;69	n	0.16	11	58	11	44;72	y	0.0348609	3.20431	up	ENSG00000143850.12
ES	novel_NIR_1984	chr1	233261321	233262958	-	233261321;233262165	233262045;233262958	ENST00000258229.13	novel	0	0	2.5	0	3;2	n	0	0	2	0	0;4	n	0	0	6.5	0	4;9	n	0.75	3	1	3	2;0	y	0.67	1	0.5	1	0;1	n	-	-	-	-	-	-	0.035828	17.75	up	ENSG00000135749.18
ES	novel_NIR_6822	chr12	102124041	102153869	+	102124041;102148463	102148230;102153869	ENST00000327680.6	novel	0.1	2	19	2	17;21	n	0	0	2.5	0	4;1	n	0	0	15	0	23;7	n	0.47	8	9	8	14;4	y	0.25	3	9	3	14;4	y	0.44	6	7.5	6	9;6	y	0.0207683	4.61743	up	ENSG00000185480.11
ES	novel_NIR_6823	chr12	102124041	102153869	+	102124041;102148463	102148235;102153869	ENST00000392911.6	novel	0.15	2	11.5	2	2;21	y	0	0	0.5	0	0;1	n	0	0	3.5	0	0;7	n	0.73	8	3	8	2;4	y	0.6	3	2	3	0;4	y	0.63	6	3.5	6	1;6	y	0.000891604	9.48698	up	ENSG00000185480.11
ES	novel_NIR_8698	chr13	110615647	110634545	+	110615647;110627547	110627439;110634545	ENST00000424185.6	novel	0	0	22.5	0	4;41	n	0	0	26.5	0	6;47	n	0	0	43	0	15;71	n	0.17	6	28.5	6	1;56	y	0.09	2	21	2	0;42	n	0.17	3	14.5	3	0;29	y	0.0329139	5.375	up	ENSG00000213995.11
ES	novel_NIR_8844	chr13	23668082	23673372	+	23668082;23669097	23668692;23673372	ENST00000248484.8	novel	0.11	3	24.5	3	26;23	n	0.11	2	17	2	22;12	n	0.14	5	30	5	25;35	n	0.24	6	18.5	6	20;17	y	0.24	4	12.5	4	17;8	y	0.18	6	28	6	14;42	y	0.0217245	4.47214	up	ENSG00000127863.15
ES	novel_NIR_9385	chr14	105228913	105252507	-	105228913;105241414	105241265;105252507	ENST00000379937.6	novel	0.1	4	35.5	4	55;16	n	0	0	29	0	34;24	n	0	0	60.5	0	97;24	n	0.25	10	30	10	45;15	y	0.25	13	38	13	52;24	y	0.16	7	36	7	39;33	y	0.0144421	4.16245	up	ENSG00000185024.15
ES	novel_NIR_10915	chr15	55234956	55289716	-	55234956;55270284	55270165;55289716	ENST00000336787.5	novel	0	0	42	0	42;42	n	0	0	40.5	0	38;43	n	0.11	10	83	10	95;71	n	0.25	9	27.5	9	25;30	y	0.14	6	35.5	6	32;39	n	0.25	14	43	14	41;45	y	0.0271029	3.40697	up	ENSG00000069974.15
ES	novel_NIR_11184	chr15	73942962	73947067	+	73942962;73946554	73946417;73947067	ENST00000261921.7	novel	0	0	6.5	0	10;3	n	0.09	1	10.5	1	10;11	n	0	0	21.5	0	18;25	n	0.18	2	9	2	6;12	y	0.15	2	11	2	9;13	y	0.15	2	11	2	5;17	y	0.0383797	4.11096	up	ENSG00000129038.15
ES	novel_NIR_12560	chr16	533998	546817	+	533998;536142	536029;546817	ENST00000219611.6	novel	0.36	2	3.5	2	5;2	y	0	0	8	0	11;5	n	0.07	1	13.5	1	20;7	n	0.67	8	4	8	5;3	y	0.53	4	3.5	4	5;2	y	0.67	8	4	8	5;3	y	0.033882	4.01085	up	ENSG00000103326.10
ES	novel_NIR_13269	chr16	88723971	88725416	-	88723971;88725080	88725009;88725416	ENST00000301015.13	novel	0.05	2	41.5	2	38;45	n	0	0	49	0	43;55	n	0.03	2	68	2	48;88	n	0.16	12	63	12	65;61	y	0.14	12	76	12	59;93	n	0.12	9	64	9	60;68	n	0.00427328	6.10658	up	ENSG00000103335.19
ES	novel_NIR_14136	chr17	44151044	44154556	+	44151044;44152777	44152637;44154556	ENST00000585683.5	novel	0.13	4	26.5	4	30;23	n	0.09	4	39.5	4	38;41	n	0.13	6	39	6	39;39	n	0.16	4	21.5	4	17;26	y	0.24	7	22	7	20;24	y	0.21	6	22	6	24;20	y	0.0445739	3.2249	up	ENSG00000125319.14
ES	novel_NIR_15594	chr18	2539145	2547355	-	2539145;2544759	2544653;2547355	ENST00000319888.10	novel	0	0	9.5	0	0;19	n	0	0	7.5	0	0;15	n	0.12	2	15	2	0;30	n	0.3	3	7	3	3;11	y	0.47	7	8	7	0;16	y	0.4	5	7.5	5	0;15	y	0.00597179	5.51107	up	ENSG00000101574.14
ES	novel_NIR_16664	chr19	35508240	35510184	-	35508240;35509961	35509911;35510184	ENST00000467637.5	novel	0.18	317	1400	317	501;2299	y	0.18	363	1686	363	619;2753	y	0.16	427	2310.5	427	787;3834	y	0.2	371	1462	371	474;2450	y	0.22	464	1613	464	519;2707	y	0.22	490	1742	490	550;2934	y	0.0132356	4.24264	up	ENSG00000161249.20
ES	novel_NIR_21219	chr20	36092813	36125423	+	36092813;36112480	36112426;36125423	ENST00000628415.2	novel	0	0	2	0	4;0	n	0	0	5	0	3;7	n	0	0	15.5	0	28;3	n	0.22	2	7	2	12;2	y	0.33	2	4	2	6;2	y	0.42	4	5.5	4	11;0	y	0.0305331	5.59099	up	ENSG00000088367.20
ES	novel_NIR_22684	chr22	24548073	24555615	-	24548073;24549001	24548917;24555615	ENST00000621833.4	novel	0	0	13	0	16;10	n	0	0	17.5	0	23;12	n	0	0	26	0	32;20	n	0.09	2	21.5	2	21;22	n	0.18	4	18	4	28;8	y	0.21	7	26	7	30;22	y	0.0472139	4.4376	up	ENSG00000138867.16
ES	novel_NIR_25562	chr4	158179735	158199088	+	158179735;158198870	158198788;158199088	ENST00000503611.5	novel	0.29	5	12	5	7;17	y	0.34	16	31.5	16	18;45	y	0.23	12	39.5	12	35;44	y	0.51	18	17.5	18	17;18	y	0.6	17	11.5	17	6;17	y	0.47	11	12.5	11	7;18	y	0.00935087	4.8107	up	ENSG00000248429.5
ES	novel_NIR_25941	chr4	427119	437446	-	427119;435879	435770;437446	ENST00000506646.5	novel	0.24	3	9.5	3	13;6	y	0.36	7	12.5	7	8;17	y	0.28	7	18	7	17;19	y	0.63	17	10	17	13;7	y	0.56	9	7	9	8;6	y	0.47	9	10	9	12;8	y	0.0129568	4.46627	up	ENSG00000182903.15
ES	novel_NIR_26160	chr4	76278224	76283381	+	76278224;76280341	76280264;76283381	ENST00000510197.5	novel	0.02	1	41	1	55;27	n	0.09	5	52	5	60;44	n	0.06	4	65	4	69;61	n	0.11	6	50	6	55;45	n	0.17	7	33.5	7	37;30	y	0.14	7	44.5	7	52;37	n	0.0365383	3.125	up	ENSG00000189157.13
ES	novel_NIR_28038	chr6	117541025	117544528	+	117541025;117543211	117543124;117544528	ENST00000296955.12	novel	0.03	2	74.5	2	63;86	n	0.02	1	54	1	55;53	n	0.12	10	72.5	10	64;81	n	0.16	9	47.5	9	45;50	y	0.27	14	38.5	14	34;43	y	0.27	13	34.5	13	39;30	y	0.0227264	3.64005	up	ENSG00000164465.18
ES	novel_NIR_29469	chr7	100435533	100435848	-	100435533;100435767	100435631;100435848	ENST00000292330.2	novel	0.26	65	183.5	65	250;117	y	0.25	93	283	93	432;134	y	0.29	143	345.5	143	447;244	y	0.3	82	189	82	275;103	y	0.33	98	198.5	98	288;109	y	0.33	109	225	109	333;117	y	0.0284054	3.41121	up	ENSG00000160813.6
ES	novel_NIR_31973	chr8	38552380	38553716	-	38552380;38553091	38552959;38553716	ENST00000519764.1	novel	0	0	2	0	2;2	n	0	0	3.5	0	3;4	n	0.29	4	10	4	11;9	y	0.63	13	7.5	13	8;7	y	0.5	5	5	5	4;6	y	0.43	6	8	6	8;8	y	0.0282516	3.74503	up	ENSG00000254100.1
ES	novel_NIR_33043	chr9	137744090	137754171	+	137744090;137752408	137752331;137754171	ENST00000460843.5	novel	0.16	4	21	4	20;22	y	0.19	3	13	3	17;9	y	0.19	7	30	7	32;28	y	0.28	10	25.5	10	22;29	y	0.23	9	31	9	27;35	y	0.29	10	25	10	21;29	y	0.0249171	4.11096	up	ENSG00000181090.17
ES	novel_NIR_33995	chrX	13762444	13767127	+	13762444;13763855	13763745;13767127	ENST00000340096.10	novel	0.3	27	63.5	27	50;77	y	0.22	24	84.5	24	62;107	y	0.29	36	89	36	80;98	y	0.41	41	59.5	41	47;72	y	0.36	24	42.5	24	41;44	y	0.34	31	61	31	56;66	y	0.0393446	3.06186	up	ENSG00000046651.14
MXE	known_NIR_2318	chr11	3808315;3822993	3822909;3823883	+	3808315;3811424	3811250;3823883	ENST00000396986.6	known	0.29	7.5	18.5	2;13	2;35	y	0.25	4.5	13.5	2;7	4;23	y	0.24	13	41	6;20	9;73	y	0.21	7	27	2;12	9;45	y	0.16	6	32.5	0;12	7;58	n	0.12	3.5	24.5	0;7	12;37	n	0.0443791	-3.20251	down	ENSG00000148985.19
MXE	known_NIR_2327	chr11	3808651;3823740	3823613;3823883	+	3808651;3811424	3811250;3823883	ENST00000463452.6	known	0.12	4	29.5	1;7	24;35	n	0.13	3	20	2;4	17;23	y	0.16	12	61	1;23	49;73	n	0.04	2	43.5	0;4	42;45	n	0.07	3	40.5	0;6	23;58	n	0.07	2.5	32.5	1;4	28;37	n	0.00871545	-4.90362	down	ENSG00000148985.19
MXE	known_NIR_2328	chr11	3808651;3823740	3823613;3823883	+	3808651;3817535	3811250;3823883	ENST00000278243.8	known	0.24	4	12.5	1;7	24;1	n	0.24	3	9.5	2;4	17;2	y	0.28	12	31	1;23	49;13	n	0.07	2	25	0;4	42;8	n	0.16	3	16	0;6	23;9	n	0.13	2.5	17	1;4	28;6	n	0.0211657	-4.50035	down	ENSG00000148985.19
MXE	known_NIR_5564	chr16	3065826;3067613	3067443;3067984	+	3065826;3067415	3067377;3067984	ENST00000530890.5	known	0.48	931	1023.5	2;1860	1686;361	y	0.45	1150	1398.5	0;2300	2241;556	n	0.47	1367	1518	0;2734	2475;561	n	0.42	960.5	1325	0;1921	2181;469	n	0.43	1158.5	1508	0;2317	2448;568	n	0.44	1143.5	1473	3;2284	2394;552	y	0.0321988	-3.47851	down	ENSG00000008517.16
MXE	known_NIR_5764	chr16	634797;635774	635612;636094	-	634797;635340	635281;636094	ENST00000397664.8	known	0.42	141	196	146;136	206;186	y	0.43	210	283	189;231	298;268	y	0.4	258	381	241;275	438;324	y	0.36	124	217	82;166	224;210	y	0.36	165.5	299.5	173;158	351;248	y	0.39	176.5	272.5	172;181	286;259	y	0.0255316	-3.5	down	ENSG00000130731.15
MXE	known_NIR_14453	chr9	32984857;32987731	32987544;32989759	-	32984857;32988129	32985971;32989759	ENST00000397172.7	known	0.11	16.5	134.5	0;33	189;80	n	0.1	14.5	129.5	0;29	164;95	n	0.11	25	193.5	13;37	238;149	y	0.08	11	126	7;15	183;69	y	0.06	8	133.5	0;16	173;94	n	0.05	8.5	154	0;17	189;119	n	0.0271218	-4.59619	down	ENSG00000137074.18
MXE	novel_NIR_15230	chr17	78997963;79000270	79000100;79009664	-	78997963;78998286	78998148;79009664	ENST00000591773.5	novel	1	5.5	0	3;8	0;0	y	0.89	8.5	1	5;12	2;0	y	0.9	9.5	1	13;6	2;0	y	0.82	9	2	14;4	4;0	y	0.75	7.5	2.5	8;7	5;0	y	0.7	3.5	1.5	1;6	1;2	n	0.0247683	-3.50584	down	ENSG00000171302.16
MXE	novel_NIR_20553	chr2	74458671;74459552	74459438;74459643	+	74458671;74459098	74458997;74459643	ENST00000393972.7	novel	0.16	3	15.5	2;4	20;11	y	0.33	4.5	9	5;4	6;12	y	0.25	7	21.5	0;14	29;14	n	0.12	1.5	10.5	1;2	10;11	n	0.09	2	20.5	2;2	31;10	n	0	0	19	0;0	24;14	n	0.0489418	-2.90003	down	ENSG00000239779.6
MXE	novel_NIR_20554	chr2	74458671;74459552	74459478;74459643	+	74458671;74459098	74458997;74459643	ENST00000393972.7	novel	0.16	3	15.5	2;4	20;11	y	0.25	3	9	2;4	6;12	y	0.25	7	21.5	0;14	29;14	n	0.09	1	10.5	0;2	10;11	n	0.05	1	20.5	0;2	31;10	n	0.14	3	19	6;0	24;14	n	0.0341846	-3.18889	down	ENSG00000239779.6
MXE	novel_NIR_20555	chr2	74458671;74459552	74459535;74459643	+	74458671;74459098	74458997;74459643	ENST00000393972.7	novel	0.16	3	15.5	2;4	20;11	y	0.18	2	9	0;4	6;12	n	0.25	7	21.5	0;14	29;14	n	0.09	1	10.5	0;2	10;11	n	0.05	1	20.5	0;2	31;10	n	0	0	19	0;0	24;14	n	0.0165064	-3.97748	down	ENSG00000239779.6
MXE	novel_NIR_21354	chr20	38421098;38422368	38422291;38431041	-	38421098;38426503	38422092;38431041	ENST00000436764.5	novel	0.39	164	255.5	328;0	44;467	n	0.41	224.5	325.5	412;37	66;585	y	0.35	195.5	366.5	391;0	67;666	n	0.26	124	344.5	248;0	67;622	n	0.29	124.5	306.5	249;0	61;552	n	0.28	136.5	343	273;0	50;636	n	0.013039	-5.40899	down	ENSG00000196756.11
MXE	novel_NIR_21355	chr20	38421098;38422368	38422291;38431041	-	38421098;38426503	38425935;38431041	ENST00000417578.5	novel	0.37	164	285	328;0	103;467	n	0.39	224.5	351	412;37	117;585	y	0.32	195.5	420	391;0	174;666	n	0.25	124	376.5	248;0	131;622	n	0.27	124.5	331	249;0	110;552	n	0.26	136.5	388.5	273;0	141;636	n	0.0330383	-4.6291	down	ENSG00000196756.11
MXE	novel_NIR_29741	chr7	128863062;128863404	128863355;128865377	+	128863062;128865203	128865120;128865377	ENST00000492758.1	novel	0.11	2	15.5	0;4	11;20	n	0.16	4	21	4;4	13;29	y	0.2	7.5	29.5	9;6	14;45	y	0	0	15.5	0;0	11;20	n	0.04	1	21.5	0;2	10;33	n	0.09	3	29	0;6	5;53	n	0.0369958	-3.07822	down	ENSG00000128524.4
MXE	novel_NIR_30865	chr7	76461836;76477178	76477114;76480421	+	76461836;76470419	76463545;76480421	ENST00000324432.9	novel	0.15	1	5.5	2;0	7;4	n	0.18	2	9	0;4	16;2	n	0.19	3.5	15	3;4	27;3	y	0.08	1.5	18	1;2	34;2	n	0.12	1.5	11.5	0;3	22;1	n	0.09	1.5	15.5	2;1	31;0	n	0.0107345	-4.51067	down	ENSG00000091073.19
MXE	novel_NIR_31944	chr8	37476012;37516956	37516803;37554022	-	37476012;37531398	37529097;37554022	ENST00000519738.5	novel	0.42	17	23	0;34	24;22	n	0.43	25	33.5	2;48	31;36	y	0.25	14.5	43.5	4;25	48;39	y	0.09	1.5	15.5	0;3	22;9	n	0.13	4	27	8;0	20;34	n	0.13	5	32.5	2;8	32;33	n	0.0444807	-4.17311	down	ENSG00000253161.5
MXE	known_NIR_2316	chr11	3808315;3811424	3811250;3823883	+	3808315;3823740	3822909;3823883	ENST00000465307.6	known	0.8	18.5	4.5	2;35	2;7	y	0.82	13.5	3	4;23	2;4	y	0.74	41	14.5	9;73	6;23	y	0.9	27	3	9;45	2;4	y	0.92	32.5	3	7;58	0;6	n	0.92	24.5	2	12;37	0;4	n	0.027086	5.07796	up	ENSG00000148985.19
MXE	known_NIR_2390	chr11	47216472;47217049	47216858;47237837	+	47216472;47235412	47232814;47237837	ENST00000378603.7	known	0.24	78	251.5	99;57	0;503	n	0.25	87.5	260	135;40	0;520	n	0.26	131.5	369	191;72	0;738	n	0.28	102.5	268	156;49	3;533	y	0.31	102.5	223	144;61	0;446	n	0.28	104.5	270	166;43	0;540	n	0.0366415	3.4641	up	ENSG00000134574.11
MXE	known_NIR_2554	chr11	62853833;62854551	62854519;62855133	-	62853833;62854064	62854018;62855133	ENST00000539975.5	known	0.26	42	119.5	10;74	239;0	n	0.27	42	111.5	13;71	223;0	n	0.29	73	178.5	33;113	357;0	n	0.32	62	130.5	16;108	258;3	y	0.35	74	139	11;137	278;0	n	0.33	52	108	26;78	216;0	n	0.00858092	4.8107	up	ENSG00000255717.6
MXE	known_NIR_4269	chr14	22925040;22928211	22928126;22928497	-	22925040;22927614	22926133;22928497	ENST00000216350.12	known	0.35	181	341.5	20;342	664;19	y	0.32	124.5	263	11;238	514;12	y	0.35	269.5	491	21;518	929;53	y	0.36	201.5	355.5	29;374	686;25	y	0.39	230.5	361.5	19;442	701;22	y	0.39	232.5	369.5	24;441	723;16	y	0.0474207	2.82843	up	ENSG00000100462.15
MXE	known_NIR_5568	chr16	3067415;3067613	3067554;3068180	+	3067415;3068010	3067984;3068180	ENST00000530890.5	known	0.39	957.5	1523.5	1780;135	361;2686	y	0.38	1181	1967.5	2229;133	556;3379	y	0.39	1345.5	2096	2568;123	561;3631	y	0.41	1069	1531	2047;91	469;2593	y	0.4	1228	1843.5	2332;124	568;3119	y	0.41	1252	1827	2382;122	552;3102	y	0.0132356	4.24264	up	ENSG00000008517.16
MXE	known_NIR_5569	chr16	3067415;3068010	3067984;3068990	+	3067415;3068239	3067554;3068990	ENST00000548652.5	known	0.07	192	2577.5	361;23	1780;3375	y	0.08	278	3347.5	556;0	2229;4466	n	0.08	280.5	3046.5	561;0	2568;3525	n	0.1	254	2298.5	469;39	2047;2550	y	0.09	284	2708	568;0	2332;3084	n	0.1	299	2741	552;46	2382;3100	y	0.0132356	4.24264	up	ENSG00000008517.16
MXE	known_NIR_8288	chr19	49666799;49667161	49667022;49673698	+	49666799;49669115	49668851;49673698	ENST00000594157.5	known	0.27	54	143.5	91;17	128;159	y	0.29	73	183	116;30	138;228	y	0.26	88.5	251.5	141;36	207;296	y	0.33	92	188.5	138;46	132;245	y	0.33	86	174.5	123;49	154;195	y	0.3	94	222.5	156;32	200;245	y	0.0255316	3.5	up	ENSG00000126453.9
MXE	known_NIR_9512	chr2	87455645;87480423	87480223;87521207	+	87455645;87472885	87470150;87521207	ENST00000419680.6	known	0.9	44	5	16;72	0;10	n	0.91	68.5	7	30;107	8;6	y	0.9	86.5	9.5	52;121	2;17	y	0.98	58	1	28;88	2;0	n	0.98	57.5	1	26;89	2;0	n	1	60	0	36;84	0;0	n	0.00167824	11.1803	up	ENSG00000222041.10
MXE	known_NIR_11969	chr5	140678015;140683219	140683100;140690855	-	140678015;140679883	140679002;140690855	ENST00000438307.6	known	0.39	73	113	7;139	226;0	n	0.37	61	103	0;122	184;22	n	0.37	95	163	0;190	285;41	n	0.42	89	124	11;167	237;11	y	0.44	109.5	140	3;216	257;23	y	0.48	144.5	157.5	32;257	289;26	y	0.0442828	3.71231	up	ENSG00000170445.12
MXE	novel_NIR_17281	chr19	44165807;44169628	44169565;44170035	+	44165807;44166882	44166705;44170035	ENST00000590089.5	novel	0.39	8	12.5	6;10	1;24	y	0.3	4.5	10.5	4;5	8;13	y	0.45	12	14.5	10;14	2;27	y	0.56	10	8	4;16	4;12	y	0.67	6	3	2;10	6;0	y	0.55	8	6.5	10;6	2;11	y	0.0219647	3.67065	up	ENSG00000167380.16
MXE	novel_NIR_30362	chr7	32716809;32722833	32722723;32723513	-	32716809;32719193	32719136;32723513	ENST00000417811.2	novel	0.12	0.5	3.5	1;0	7;0	n	0.6	6	4	3;9	4;4	y	0.35	4.5	8.5	4;5	12;5	y	1	3.5	0	0;7	0;0	n	-	-	-	-	-	-	0.9	9	1	0;18	2;0	n	0.0392512	4.02678	up	ENSG00000229358.3
Type	ID(IR)	Chr	Ass1	Ass2	Strand	Isoform	KorN	siCtrl_1st.Ratio	siCtrl_1st.intron_ave_base	siCtrl_1st.ends_exon_ave_base	siCtrl_1st.isfiltered	siCtrl_2nd.Ratio	siCtrl_2nd.intron_ave_base	siCtrl_2nd.ends_exon_ave_base	siCtrl_2nd.isfiltered	siCtrl_3rd.Ratio	siCtrl_3rd.intron_ave_base	siCtrl_3rd.ends_exon_ave_base	siCtrl_3rd.isfiltered	siDEK_1st.Ratio	siDEK_1st.intron_ave_base	siDEK_1st.ends_exon_ave_base	siDEK_1st.isfiltered	siDEK_2nd.Ratio	siDEK_2nd.intron_ave_base	siDEK_2nd.ends_exon_ave_base	siDEK_2nd.isfiltered	siDEK_3rd.Ratio	siDEK_3rd.intron_ave_base	siDEK_3rd.ends_exon_ave_base	siDEK_3rd.isfiltered	P-value	Tvalue	DiffType	Gene	Symbol	Chr	GeneType	Description
IntronR	known_IR_7	chr1	109281046	109281137	-	ENST00000409267.5	known	0.24	23.59	97.75	y	0.18	19.74	110.02	n	0.16	24.07	152.97	n	0.04	3.31	84.27	n	0.11	11.04	100.46	n	0.06	7.28	117.55	n	0.0185549	-3.87865	down	ENSG00000134222.16	PSRC1	chr1	protein_coding	proline/serine-rich coiled-coil 1
IntronR	known_IR_103	chr1	43384552	43385046	-	ENST00000290663.10	known	2.15	175.57	81.49	y	2.38	224.59	94.39	y	2.38	266.88	112.26	y	1.86	148.57	80.01	y	1.8	161.04	89.24	y	2.12	183.37	86.59	y	0.0420359	-3.02329	down	ENSG00000159479.16	MED8	chr1	protein_coding	mediator complex subunit 8
IntronR	known_IR_110	chr1	46032701	46032705	+	ENST00000372009.3	known	1.2	115	95.98	y	1.12	138.67	124.19	y	1.14	181	159	y	1.01	166.67	165.07	y	1.04	110	106.03	y	1.09	142.33	131.12	y	0.0334448	-3.18412	down	ENSG00000086015.20	MAST2	chr1	protein_coding	microtubule associated serine/threonine kinase 2
IntronR	known_IR_276	chr11	71999019	71999259	+	ENST00000393705.8	known	1.95	0.81	0.42	n	2.75	4.49	1.63	y	2.36	1	0.42	n	-	-	-	-	0.22	0.21	0.98	n	0	0	2.17	n	0.00446693	-8.76915	down	ENSG00000137496.17	IL18BP	chr11	protein_coding	interleukin 18 binding protein
IntronR	known_IR_574	chr16	29807786	29807788	+	ENST00000616501.4	known	0.99	1669	1680.64	y	0.98	1754	1787.81	y	0.99	2569	2607.94	y	0.97	1841	1892.49	y	0.97	1942	2008.91	y	0.97	1863	1925.36	y	0.0377496	-5	down	ENSG00000103495.13	MAZ	chr16	protein_coding	MYC-associated zinc finger protein (purine-binding transcription factor)
IntronR	known_IR_635	chr16	89553116	89553119	+	ENST00000620811.4	known	1.11	47	42.4	n	1.04	79	75.7	y	1.07	118	110.55	y	0.94	70	74.23	n	0.9	72	79.86	n	0.98	95.5	97.17	y	0.012721	-4.33861	down	ENSG00000197912.13	SPG7	chr16	protein_coding	spastic paraplegia 7 (pure and complicated autosomal recessive)
IntronR	known_IR_640	chr16	89920208	89920590	+	ENST00000555427.1	known	3.02	62.97	20.84	y	2.9	81.26	28.03	y	2.39	85.56	35.73	y	1.64	47.05	28.67	y	1.92	64.28	33.55	y	2.24	61.33	27.38	y	0.0326931	-3.22405	down	ENSG00000258839.2	MC1R	chr16	protein_coding	melanocortin 1 receptor (alpha melanocyte stimulating hormone receptor)
IntronR	known_IR_737	chr17	76737976	76738282	+	ENST00000593181.5	known	0.83	4.43	5.32	y	1.11	5.46	4.92	y	0.65	9.28	14.27	y	0.26	3.79	14.74	y	0.56	6.5	11.69	y	0.33	3.76	11.53	y	0.0484081	-2.96986	down	ENSG00000092931.11	MFSD11	chr17	protein_coding	major facilitator superfamily domain containing 11
IntronR	known_IR_832	chr19	39024242	39024400	-	ENST00000509137.6	known	1.86	14.07	7.55	y	2.08	13.36	6.43	y	2.11	19.57	9.27	y	1.44	10.91	7.55	y	1.75	11.98	6.85	y	1.35	11.07	8.2	y	0.0322824	-3.48256	down	ENSG00000161243.8	FBXO27	chr19	protein_coding	F-box protein 27
IntronR	known_IR_847	chr19	42079862	42079864	+	ENST00000613064.2	known	1.49	104	69.63	n	1.49	111	74.69	n	1.43	154	107.9	y	1.29	111	86.02	n	1.35	133	98.21	n	1.33	124	92.96	n	0.00557388	-5.5	down	ENSG00000105732.11	ZNF574	chr19	protein_coding	zinc finger protein 574
IntronR	known_IR_894	chr19	52555527	52555696	+	ENST00000611267.1	known	0.77	10.6	13.8	y	0.99	11.74	11.85	y	0.62	11.66	18.67	y	0.25	3.78	15.03	y	0.47	4.96	10.53	y	0.44	6.05	13.8	y	0.041768	-3.18635	down	ENSG00000198482.10	ZNF808	chr19	protein_coding	zinc finger protein 808
IntronR	known_IR_1123	chr3	128910050	128910053	+	ENST00000620948.3	known	0.94	203.5	215.95	y	0.95	226.5	239.16	y	0.92	355	386.08	y	0.86	191	221.77	y	0.9	196	217.22	y	0.86	210	244.38	y	0.0218957	-3.96177	down	ENSG00000177646.17	ACAD9	chr3	protein_coding	acyl-CoA dehydrogenase family, member 9
IntronR	known_IR_1156	chr3	195688319	195688533	+	ENST00000625358.2	known	1.63	14.89	9.11	y	1.66	22.02	13.26	y	1.45	27.56	19.07	y	0.88	8.26	9.42	y	0.98	11.73	11.95	y	1.26	6.32	5.02	y	0.0229985	-4.11348	down	ENSG00000242086.8	LINC00969	chr3	lincRNA	long intergenic non-protein coding RNA 969
IntronR	known_IR_1158	chr3	25791315	25791770	+	ENST00000626005.1	known	0.95	58.68	61.63	y	0.96	50.17	52.45	y	0.83	80.38	97.02	y	0.69	48.93	70.53	y	0.73	50.31	68.98	y	0.73	56.72	77.7	y	0.0325674	-4.48569	down	ENSG00000151093.7	OXSM	chr3	protein_coding	3-oxoacyl-ACP synthase, mitochondrial
IntronR	known_IR_1316	chr5	79612735	79613011	+	ENST00000423041.6	known	1.22	10.41	8.55	y	0.93	6.48	6.96	y	1.3	17.46	13.42	y	0.3	4.55	15.35	y	0.54	3.15	5.82	y	0.46	7.85	17.11	y	0.00920063	-5.40037	down	ENSG00000164329.13	PAPD4	chr5	protein_coding	PAP associated domain containing 4
IntronR	known_IR_1317	chr5	79612769	79613011	+	ENST00000296783.7	known	0.75	9.71	13.01	y	0.6	6.25	10.37	y	0.87	15.96	18.29	y	0.27	4.22	15.45	y	0.35	2.59	7.31	y	0.35	7.11	20.36	y	0.0237731	-5.0487	down	ENSG00000164329.13	PAPD4	chr5	protein_coding	PAP associated domain containing 4
IntronR	known_IR_1318	chr5	80628938	80629039	-	ENST00000505337.5	known	1.63	184.82	113.12	y	1.63	192.07	118.1	y	1.56	278.91	178.7	y	1.44	165.2	114.98	y	1.33	137.41	103.15	y	1.29	163.88	127.1	y	0.0151891	-5.01129	down	ENSG00000228716.6	DHFR	chr5	protein_coding	dihydrofolate reductase
IntronR	known_IR_1566	chrX	49068090	49068544	+	ENST00000603986.5	known	1.93	34.46	17.86	y	2.09	32.96	15.78	y	1.86	59.36	31.87	y	1.53	39.89	26.06	y	1.56	46.37	29.71	y	1.64	53.16	32.49	y	0.0162865	-5.07243	down	ENSG00000147144.12	CCDC120	chrX	protein_coding	coiled-coil domain containing 120
IntronR	novel_IR_13	chr1	10450322	10451377	+	ENST00000377049.3	novel	0.3	1.39	4.61	n	0.38	0.84	2.21	y	0.25	1.33	5.31	n	0.08	0.27	3.34	n	0.1	0.36	3.73	n	0.23	0.82	3.55	n	0.0478804	-2.87122	down	ENSG00000241563.3	CORT	chr1	protein_coding	cortistatin
IntronR	novel_IR_14	chr1	10461702	10463058	-	ENST00000377038.7	novel	0.87	47.63	55.03	y	0.86	53.38	62.13	y	0.76	68.6	89.82	y	0.62	41.81	67.75	y	0.67	49.53	74.24	y	0.65	50.51	77.97	y	0.0221642	-4.82382	down	ENSG00000160049.11	DFFA	chr1	protein_coding	DNA fragmentation factor, 45kDa, alpha polypeptide
IntronR	novel_IR_139	chr1	147622531	147623842	+	ENST00000622552.4	novel	0.36	5.27	14.78	y	0.44	5.42	12.45	y	0.36	6.45	17.82	y	0.15	2.93	19.18	n	0.17	3.21	18.75	n	0.28	4.45	16.15	y	0.0237836	-3.8552	down	ENSG00000116128.9	BCL9	chr1	protein_coding	B-cell CLL/lymphoma 9
IntronR	novel_IR_237	chr1	155253732	155254653	-	ENST00000350210.6	novel	0.32	13.2	41.71	n	0.3	12.94	43.02	n	0.31	27.36	89.31	n	0.22	14.89	67.62	n	0.24	16.48	67.56	n	0.26	18.11	69.79	y	0.0129527	-5.42218	down	ENSG00000160767.20	FAM189B	chr1	protein_coding	family with sequence similarity 189, member B
IntronR	novel_IR_341	chr1	16620024	16621946	-	ENST00000412962.2	novel	0.71	9.51	13.39	y	0.72	7.93	11.03	y	0.67	15.24	22.64	y	0.5	9.66	19.26	y	0.5	8.67	17.18	y	0.38	7.04	18.78	y	0.0167367	-5.60519	down	ENSG00000282056.1	CROCCP2	chr1	transcribed_unprocessed_pseudogene	ciliary rootlet coiled-coil, rootletin pseudogene 2
IntronR	novel_IR_381	chr1	180087717	180090714	+	ENST00000367607.7	novel	0.54	0.63	1.16	y	0.54	0.43	0.79	n	0.41	0.59	1.43	n	0.11	0.43	3.99	n	0.21	0.53	2.54	n	0.12	0.83	7.02	n	0.00385263	-6.51182	down	ENSG00000135837.15	CEP350	chr1	protein_coding	centrosomal protein 350kDa
IntronR	novel_IR_386	chr1	183218488	183220825	+	ENST00000493293.5	novel	0.2	1.22	6.09	y	0.12	1.2	10.34	n	0.16	1.84	11.56	n	0.03	0.49	19.34	n	0.04	0.52	13.03	n	0.09	0.58	6.86	n	0.0245642	-3.60028	down	ENSG00000058085.14	LAMC2	chr1	protein_coding	laminin, gamma 2
IntronR	novel_IR_396	chr1	18890193	18908539	-	ENST00000494072.3	novel	0.84	19.43	23.08	y	0.72	19.89	27.52	y	0.75	27.85	37.16	y	0.58	16.08	27.74	y	0.54	18.32	33.98	y	0.59	19.76	33.53	y	0.0187545	-5.10754	down	ENSG00000255275.3	RP13-279N23.2	chr1	protein_coding	--
IntronR	novel_IR_404	chr1	19740941	19745532	-	ENST00000294543.10	novel	0.32	8.53	26.54	y	0.41	8.93	21.82	y	0.35	12.45	36.04	y	0.22	6.27	28.2	y	0.22	8.16	37.68	y	0.25	7.59	30.61	y	0.0271218	-4.59619	down	ENSG00000162542.13	TMCO4	chr1	protein_coding	transmembrane and coiled-coil domains 4
IntronR	novel_IR_593	chr1	28579587	28579912	-	ENST00000531126.5	novel	0.52	106.47	206.17	y	0.51	137.97	269.22	y	0.5	173.91	346.3	y	0.45	94.94	211.02	y	0.44	100.69	228.05	y	0.43	114.61	268.47	y	0.00101666	-8.57321	down	ENSG00000197989.13	SNHG12	chr1	antisense	small nucleolar RNA host gene 12
IntronR	novel_IR_594	chr1	28579587	28579942	-	ENST00000475441.5	novel	0.45	106.75	236.62	y	0.44	137.24	313.36	y	0.42	172.13	407.38	y	0.41	97.22	239.19	y	0.39	102.81	260.37	y	0.37	115.5	313.75	y	0.0357875	-3.21182	down	ENSG00000197989.13	SNHG12	chr1	antisense	small nucleolar RNA host gene 12
IntronR	novel_IR_636	chr1	36324069	36327720	+	ENST00000373137.2	novel	0.24	0.4	1.65	y	0.23	0.55	2.42	n	0.27	0.52	1.89	y	0.16	0.42	2.6	n	0.15	0.4	2.71	n	0.16	0.47	3.05	n	0.0125081	-7.21605	down	ENSG00000116883.8	RP11-268J15.5	chr1	antisense	--
IntronR	novel_IR_642	chr1	37861091	37861495	+	ENST00000419993.1	novel	1.03	0.34	0.33	n	1	0.73	0	n	1.65	0.54	0.33	n	0.62	0.86	1.38	y	0	0	0.42	n	0	0	1.17	n	0.0261638	-3.44648	down	ENSG00000230955.1	RP11-109P14.10	chr1	antisense	--
IntronR	novel_IR_803	chr1	962917	963109	+	ENST00000338591.7	novel	0.27	2.95	10.94	y	0.17	3.98	23.45	n	0.22	4.49	20.41	n	0.05	0.68	14.62	n	0.11	2.19	20.2	n	0.06	0.9	14.03	n	0.0180776	-4.27366	down	ENSG00000187961.13	KLHL17	chr1	protein_coding	kelch-like family member 17
IntronR	novel_IR_887	chr10	126009266	126009373	+	ENST00000368693.5	novel	0.78	6.16	7.87	y	0.85	7.84	9.27	y	0.68	9.35	13.75	y	0.2	2.27	11.54	n	0.2	2.37	11.72	y	0.47	7.74	16.47	y	0.0171336	-4.6769	down	ENSG00000203780.10	FANK1	chr10	protein_coding	fibronectin type III and ankyrin repeat domains 1
IntronR	novel_IR_951	chr10	38054511	38064088	+	ENST00000469037.2	novel	0.92	8.3	8.99	y	1.06	8.05	7.63	y	0.92	11.85	12.95	y	0.69	7.16	10.33	y	0.63	5.57	8.85	y	0.64	7.85	12.24	y	0.0122796	-6.239	down	ENSG00000189180.15	ZNF33A	chr10	protein_coding	zinc finger protein 33A
IntronR	novel_IR_991	chr10	5958351	5959754	-	ENST00000620865.4	novel	0.21	1.05	5.1	n	0.3	2	6.63	y	0.27	2.23	8.3	n	0.18	1.07	6.02	n	0.07	0.67	9.03	n	0.11	0.9	7.97	n	0.0298468	-3.36269	down	ENSG00000134470.19	IL15RA	chr10	protein_coding	interleukin 15 receptor, alpha
IntronR	novel_IR_1196	chr11	289239	289804	+	ENST00000409548.6	novel	0.51	3.98	7.76	y	0.54	1.04	1.92	n	0.6	4.49	7.49	y	0.15	1.39	9.28	n	0.12	0.43	3.72	n	0.05	0.3	5.9	n	0.0003927	-11.1611	down	ENSG00000142102.15	ATHL1	chr11	protein_coding	ATH1, acid trehalase-like 1 (yeast)
IntronR	novel_IR_1246	chr11	47837623	47839843	-	ENST00000378460.6	novel	0.25	3.31	13.25	y	0.2	2.71	13.79	n	0.25	5.23	21	y	0.12	2.23	18.58	n	0.17	2.64	15.91	n	0.16	3.6	21.86	n	0.0213723	-3.68605	down	ENSG00000030066.13	NUP160	chr11	protein_coding	nucleoporin 160kDa
IntronR	novel_IR_1282	chr11	62789426	62789886	+	ENST00000533861.5	novel	0.2	112.53	558.96	y	0.19	134.61	701.18	n	0.2	172.12	882.45	n	0.19	116.82	612.22	n	0.18	124.37	683.56	n	0.18	143.87	807.93	n	0.0474207	-2.82843	down	ENSG00000185475.8	TMEM179B	chr11	protein_coding	transmembrane protein 179B
IntronR	novel_IR_1431	chr11	74007137	74008978	-	ENST00000426995.2	novel	1.08	0.19	0.18	y	1	0.22	0	n	-	-	-	-	0	0	0.89	n	0	0	1.02	n	-	-	-	-	0.0244733	-26	down	ENSG00000175564.12	UCP3	chr11	protein_coding	uncoupling protein 3 (mitochondrial, proton carrier)
IntronR	novel_IR_1467	chr11	83157631	83161327	+	ENST00000298281.8	novel	1.18	9.93	8.41	y	1.19	9.74	8.22	y	1.03	16.22	15.7	y	0.8	9.39	11.77	y	0.6	6.31	10.55	y	0.84	8.82	10.49	y	0.0164329	-4.27291	down	ENSG00000165494.10	PCF11	chr11	protein_coding	PCF11 cleavage and polyadenylation factor subunit
IntronR	novel_IR_1520	chr12	108789244	108792286	-	ENST00000326495.9	novel	0.19	2.01	10.85	n	0.21	2.34	11.02	y	0.17	2.66	15.37	n	0.13	1.42	10.53	n	0.08	0.89	11.2	n	0.14	1.67	11.8	n	0.0372715	-3.35497	down	ENSG00000084112.14	SSH1	chr12	protein_coding	slingshot protein phosphatase 1
IntronR	novel_IR_1586	chr12	121823749	121825200	+	ENST00000604567.5	novel	0.31	2.05	6.69	n	0.42	1.82	4.34	n	0.41	2.99	7.23	y	0.16	0.99	6.38	n	0.23	1.16	4.97	n	0.17	1.21	7.09	n	0.0144411	-4.67377	down	ENSG00000139718.10	SETD1B	chr12	protein_coding	SET domain containing 1B
IntronR	novel_IR_1635	chr12	132676653	132677363	-	ENST00000320574.9	novel	0.47	0.79	1.67	y	0.41	1.11	2.67	y	0.23	0.99	4.27	y	0	0	1.69	n	0	0	3.75	n	0.02	0.07	3.05	n	0.0362264	-5.01713	down	ENSG00000177084.16	POLE	chr12	protein_coding	polymerase (DNA directed), epsilon, catalytic subunit
IntronR	novel_IR_1836	chr12	6678343	6678946	-	ENST00000355772.8	novel	0.26	10.97	42.38	y	0.32	11	33.99	y	0.31	16.61	52.84	y	0.21	10.22	49.1	y	0.23	11.9	52.56	y	0.25	13.81	56.37	y	0.0480535	-3.04997	down	ENSG00000126746.17	ZNF384	chr12	protein_coding	zinc finger protein 384
IntronR	novel_IR_1923	chr12	9421890	9422565	-	ENST00000432996.2	novel	0.2	0.47	2.32	y	0.22	1.17	5.36	y	0.37	0.66	1.76	n	0	0	1.01	n	0.14	0.54	3.85	n	0	0	3.38	n	0.0390912	-3.04725	down	ENSG00000214826.5	DDX12P	chr12	unprocessed_pseudogene	DEAD/H (Asp-Glu-Ala-Asp/His) box polypeptide 12, pseudogene
IntronR	novel_IR_1962	chr13	112967989	112968619	-	ENST00000446789.2	novel	0.35	8.86	25.41	y	0.37	10.61	28.35	y	0.43	11.65	26.8	y	0.31	10.25	33.59	y	0.22	6.38	29.43	y	0.27	8.17	30.73	y	0.0304278	-3.29252	down	ENSG00000235280.2	MCF2L-AS1	chr13	antisense	MCF2L antisense RNA 1
IntronR	novel_IR_1991	chr13	23891531	23896869	+	ENST00000417034.1	novel	0.8	2.47	3.09	n	0.96	3.12	3.27	n	1.11	4.72	4.26	n	0.69	3.17	4.59	n	0.54	2.84	5.23	y	0.55	3.79	6.9	y	0.0360096	-3.57041	down	ENSG00000205861.11	C1QTNF9B-AS1	chr13	antisense	C1QTNF9B antisense RNA 1
IntronR	novel_IR_2095	chr14	105369900	105376768	+	ENST00000430725.6	novel	0.26	12.02	45.88	y	0.3	13.05	43.53	y	0.22	17.08	76.12	y	0.16	9.58	60.75	n	0.16	11.99	73.84	n	0.2	13.01	65.37	n	0.0433079	-3.25	down	ENSG00000179364.13	PACS2	chr14	protein_coding	phosphofurin acidic cluster sorting protein 2
IntronR	novel_IR_2342	chr15	20439123	20439508	-	ENST00000426501.5	novel	1.11	1.67	1.5	y	0.53	0.68	1.28	n	1.08	2.06	1.91	y	0.06	0.14	2.54	n	0.15	0.16	1.09	n	0	0	0.46	n	0.0412189	-4.32373	down	ENSG00000180229.12	HERC2P3	chr15	transcribed_unprocessed_pseudogene	hect domain and RLD 2 pseudogene 3
IntronR	novel_IR_2374	chr15	40838125	40838543	-	ENST00000568419.1	novel	0.35	42.04	120.51	y	0.34	55.06	162.12	y	0.35	70.99	204.78	y	0.31	41.3	135.3	y	0.32	48.18	149.48	y	0.33	53.64	163.3	y	0.0248175	-4	down	ENSG00000261183.5	RP11-532F12.5	chr15	antisense	--
IntronR	novel_IR_2512	chr15	74043139	74044221	+	ENST00000268058.7	novel	0.82	8.68	10.57	y	0.93	11.69	12.56	y	1	15.88	15.89	y	0.64	13.04	20.41	y	0.59	14.5	24.65	y	0.55	11.19	20.49	y	0.0124036	-5.52709	down	ENSG00000140464.19	PML	chr15	protein_coding	promyelocytic leukemia
IntronR	novel_IR_2599	chr16	10529699	10531810	+	ENST00000535363.1	novel	1	0.13	0	n	-	-	-	-	0.85	0.07	0.09	y	0.23	0.06	0.26	n	0	0	0.24	n	0.24	0.07	0.3	n	0.00773482	-7.08226	down	ENSG00000256013.1	RP11-27M24.1	chr16	antisense	--
IntronR	novel_IR_2755	chr16	29986504	29989593	+	ENST00000279394.7	novel	0.92	46	50.15	y	0.95	56.95	59.75	y	0.95	79.1	83.4	y	0.71	58.73	82.23	y	0.82	68.86	83.64	y	0.73	68.92	94.62	y	0.0237983	-5.2915	down	ENSG00000149930.17	TAOK2	chr16	protein_coding	TAO kinase 2
IntronR	novel_IR_2831	chr16	31449773	31453284	-	ENST00000569291.1	novel	1.02	3.91	3.85	y	1.01	3.78	3.73	y	1.2	4.4	3.67	y	0.46	2.87	6.2	y	0.47	1.85	3.97	y	0.47	2.65	5.69	y	0.00992358	-9.8667	down	ENSG00000261474.1	RP11-452L6.1	chr16	lincRNA	--
IntronR	novel_IR_2955	chr16	677388	677459	+	ENST00000352681.7	novel	0.69	4.29	6.17	y	0.65	4.37	6.73	y	0.6	3.64	6.03	y	0	0	10.92	n	0	0	3.06	n	0	0	0.87	n	0.00161686	-24.8392	down	ENSG00000103269.13	RHBDL1	chr16	protein_coding	rhomboid, veinlet-like 1 (Drosophila)
IntronR	novel_IR_2975	chr16	685990	686068	-	ENST00000293883.8	novel	0.22	8.31	37.87	y	0.22	8.49	39.43	y	0.14	8.56	59.8	n	0.11	4.75	45	n	0	0	42.15	n	0.02	1	49.56	n	0.027561	-3.4822	down	ENSG00000127580.15	WDR24	chr16	protein_coding	WD repeat domain 24
IntronR	novel_IR_3021	chr16	74310134	74334892	-	ENST00000561921.1	novel	2	1.01	0.51	n	1.66	1.18	0.71	y	1.22	1.74	1.43	n	0.36	0.85	2.32	n	0.68	1.02	1.51	n	0.43	1.02	2.39	n	0.0236084	-4.62461	down	ENSG00000259972.2	AC009120.6	chr16	processed_transcript	--
IntronR	novel_IR_3117	chr17	17994418	17994999	+	ENST00000313838.12	novel	0.89	2.03	2.27	n	0.49	0.51	1.04	n	0.68	1.65	2.41	y	0	0	0.52	n	0	0	1.91	n	0.2	0.51	2.48	n	0.0162635	-4.64855	down	ENSG00000171962.17	LRRC48	chr17	protein_coding	leucine rich repeat containing 48
IntronR	novel_IR_3206	chr17	3608565	3609309	-	ENST00000572705.1	novel	7.93	97.53	12.3	y	7.11	111.97	15.75	y	6.33	167.22	26.42	y	4.65	84.81	18.25	y	4.06	99.34	24.47	y	4.84	101.66	21	y	0.0155208	-5.03032	down	ENSG00000262304.1	TRPV1	chr17	protein_coding	transient receptor potential cation channel, subfamily V, member 1
IntronR	novel_IR_3468	chr17	7405610	7408012	+	ENST00000575301.5	novel	0.27	0.58	2.16	y	0.31	0.58	1.9	y	0.42	0.69	1.66	y	0.08	0.27	3.29	n	0.11	0.23	2.1	n	0	0	1.86	n	0.0103128	-4.85806	down	ENSG00000169992.9	NLGN2	chr17	protein_coding	neuroligin 2
IntronR	novel_IR_3566	chr17	79919576	79922691	+	ENST00000574526.1	novel	0.9	0.05	0.06	y	1.28	0.19	0.15	n	1.73	0.66	0.38	n	0	0	0.19	n	0	0	0.1	n	0	0	0.22	n	0.0322464	-5.43318	down	ENSG00000262188.1	RP11-353N14.4	chr17	lincRNA	--
IntronR	novel_IR_3588	chr17	81108509	81110914	+	ENST00000575245.5	novel	0.28	33.42	119.82	n	0.3	46.74	153.71	y	0.25	51.93	204.82	n	0.18	31.32	174.53	n	0.18	41.86	232.97	n	0.2	41.87	204.53	y	0.0132283	-5.62989	down	ENSG00000175866.15	BAIAP2	chr17	protein_coding	BAI1-associated protein 2
IntronR	novel_IR_3599	chr17	8149603	8149755	-	ENST00000581082.5	novel	0.65	2.54	3.89	y	0.73	1.15	1.57	y	0.9	3.23	3.57	y	0.32	0.5	1.57	n	0.19	0.33	1.78	n	0.22	1.99	9	y	0.00809139	-6.18517	down	ENSG00000179094.13	PER1	chr17	protein_coding	period circadian clock 1
IntronR	novel_IR_3633	chr17	82449480	82450480	-	ENST00000437807.6	novel	1.33	6.83	5.13	y	1.53	6.42	4.19	y	1.23	7.55	6.14	n	1.02	3.55	3.49	n	0.65	2.92	4.5	n	0.71	6.71	9.43	y	0.0191563	-3.94068	down	ENSG00000178927.16	C17orf62	chr17	protein_coding	chromosome 17 open reading frame 62
IntronR	novel_IR_3836	chr19	15244762	15254152	-	ENST00000263377.6	novel	0.48	11.24	23.48	y	0.46	12.76	27.91	y	0.55	18.69	33.77	n	0.39	9.81	25.42	n	0.36	13.03	35.98	n	0.39	12.14	31.4	n	0.0379375	-4.01478	down	ENSG00000141867.17	BRD4	chr19	protein_coding	bromodomain containing 4
IntronR	novel_IR_3924	chr19	19789129	19789986	-	ENST00000590697.1	novel	1.39	4.51	3.25	y	1.32	2.51	1.9	y	1.07	3.66	3.43	y	0.69	2.41	3.51	y	0.59	1.75	2.94	y	0.71	1.46	2.06	y	0.0157977	-5.73848	down	ENSG00000267481.1	CTC-559E9.5	chr19	sense_intronic	--
IntronR	novel_IR_3942	chr19	21554952	21569104	-	ENST00000594564.1	novel	1	0.29	0	n	1	0.15	0	n	1	0.27	0	n	0.43	0.22	0.52	n	0.28	0.17	0.6	y	0.2	0.11	0.59	n	0.00923385	-10.3344	down	ENSG00000268081.1	RP11-678G14.2	chr19	antisense	--
IntronR	novel_IR_3943	chr19	2191240	2193689	+	ENST00000398665.7	novel	0.29	2.36	8.06	n	0.32	4.37	13.66	y	0.33	4.84	14.79	y	0.2	4.02	20.58	n	0.27	3.58	13.23	y	0.19	3.13	16.56	n	0.0472234	-3.34664	down	ENSG00000104885.17	DOT1L	chr19	protein_coding	DOT1-like histone H3K79 methyltransferase
IntronR	novel_IR_3946	chr19	2341014	2343211	+	ENST00000613503.4	novel	0.3	9.87	32.43	y	0.33	12.55	38.61	y	0.32	18.22	56.99	y	0.2	8.6	43.69	n	0.17	11.38	67.88	n	0.21	9.4	43.84	y	0.00167659	-8.27345	down	ENSG00000005206.16	SPPL2B	chr19	protein_coding	signal peptide peptidase like 2B
IntronR	novel_IR_4194	chr19	46608327	46608924	+	ENST00000597743.5	novel	0.49	1274.4	2609.38	y	0.5	1335.27	2662.71	y	0.51	1844.84	3628.81	y	0.48	1234.82	2562.99	y	0.47	1407.77	2970.44	y	0.47	1344.55	2889.69	y	0.0248175	-4	down	ENSG00000160014.16	CALM3	chr19	protein_coding	calmodulin 3 (phosphorylase kinase, delta)
IntronR	novel_IR_4195	chr19	46609378	46610586	-	ENST00000597609.1	novel	0.58	1.77	3.05	n	0.54	2.52	4.64	y	0.46	5.11	11.06	y	0.34	3.14	9.29	y	0.27	2.34	8.54	y	0.19	2.04	10.52	n	0.0106129	-4.65309	down	ENSG00000269292.1	CTB-12A17.3	chr19	antisense	--
IntronR	novel_IR_4210	chr19	48230109	48230433	-	ENST00000357778.6	novel	0.36	2.3	6.39	y	0.22	2.76	12.61	y	0.31	3.13	10.23	n	0.13	1.26	9.88	n	0	0	10.94	n	0	0	4.53	n	0.0132627	-4.24853	down	ENSG00000105483.16	CARD8	chr19	protein_coding	caspase recruitment domain family, member 8
IntronR	novel_IR_4395	chr19	58311380	58312021	+	ENST00000608004.1	novel	1	11.04	11.03	y	1.4	9.16	6.56	y	1	15.72	15.77	y	0.24	3.48	14.23	y	0.44	5.19	11.68	y	0.6	6.65	11.01	y	0.0157066	-4.17699	down	ENSG00000142396.10	ERVK3-1	chr19	processed_transcript	endogenous retrovirus group K3, member 1
IntronR	novel_IR_4444	chr19	783330	784787	+	ENST00000586061.1	novel	0.25	2.53	10.31	y	0.37	3.56	9.52	y	0.31	5	16.26	y	0.12	1.97	16.18	n	0.1	1.61	16.14	n	0.23	3.43	15.21	y	0.0409052	-3.00588	down	ENSG00000267530.2	AC006273.5	chr19	lincRNA	--
IntronR	novel_IR_4571	chr2	160169307	160172569	-	ENST00000283249.6	novel	0.43	2.05	4.79	y	0.45	1.26	2.81	n	0.38	2.1	5.48	y	0.25	0.74	2.97	n	0.32	0.94	2.99	y	0.27	1.16	4.29	y	0.00893428	-4.75556	down	ENSG00000115221.10	ITGB6	chr2	protein_coding	integrin, beta 6
IntronR	novel_IR_4701	chr2	237486738	237487398	+	ENST00000410032.5	novel	1.14	13.08	11.49	y	1.08	12.04	11.14	y	1.17	20.64	17.63	y	1.01	15.99	15.91	y	1.06	17.64	16.72	y	0.97	14.51	14.91	y	0.0347566	-3.14309	down	ENSG00000115648.13	MLPH	chr2	protein_coding	melanophilin
IntronR	novel_IR_4775	chr2	43566821	43570388	-	ENST00000403856.1	novel	0.2	0.17	0.85	n	0.33	0.13	0.38	y	0.18	0.14	0.79	n	0	0	0.89	n	0.09	0.04	0.48	n	0.05	0.03	0.71	n	0.0361469	-3.53499	down	ENSG00000115970.18	THADA	chr2	protein_coding	thyroid adenoma associated
IntronR	novel_IR_4815	chr2	63947490	63949037	-	ENST00000409558.8	novel	0.17	0.57	3.39	n	0.29	0.55	1.89	y	0.2	0.31	1.55	n	0	0	4.12	n	0	0	3.98	n	0	0	6.81	n	0.0258236	-6.1017	down	ENSG00000143952.19	VPS54	chr2	protein_coding	vacuolar protein sorting 54 homolog (S. cerevisiae)
IntronR	novel_IR_4819	chr2	675630	676574	-	ENST00000405941.3	novel	0.26	12.14	47.28	y	0.25	14.46	57.64	y	0.27	22.77	83.48	y	0.24	10.67	43.79	y	0.21	11.74	56.72	y	0.22	13.65	61.27	y	0.0321988	-3.47851	down	ENSG00000151353.14	TMEM18	chr2	protein_coding	transmembrane protein 18
IntronR	novel_IR_4827	chr2	70085624	70086055	-	ENST00000418308.5	novel	0.32	2.25	7.08	y	0.56	2.2	3.91	y	0.49	4.28	8.8	n	0	0	4.8	n	0.08	0.48	5.7	n	0.07	0.37	5.42	n	0.0199221	-5.38119	down	ENSG00000179818.13	PCBP1-AS1	chr2	processed_transcript	PCBP1 antisense RNA 1
IntronR	novel_IR_4828	chr2	70085624	70086124	-	ENST00000419542.3	novel	0.23	2.38	10.34	y	0.4	2.11	5.31	y	0.25	3.69	14.84	n	0.03	0.19	7.22	n	0.08	0.67	8.33	n	0.05	0.41	8.47	n	0.0387265	-4.31827	down	ENSG00000179818.13	PCBP1-AS1	chr2	processed_transcript	PCBP1 antisense RNA 1
IntronR	novel_IR_4865	chr2	74534236	74536291	-	ENST00000409249.5	novel	0.4	11.14	28.1	y	0.38	15.45	40.79	n	0.41	23.74	58.19	n	0.34	12.2	35.98	n	0.26	11	41.74	n	0.29	12.14	41.77	n	0.0372115	-4.00892	down	ENSG00000115318.11	LOXL3	chr2	protein_coding	lysyl oxidase-like 3
IntronR	novel_IR_4891	chr2	97163854	97164283	+	ENST00000620383.1	novel	1.46	0.51	0.35	y	1.29	0.35	0.27	y	1	0.58	0	n	-	-	-	-	0.05	0.08	1.78	n	0	0	1.35	n	0.0099021	-8.96808	down	ENSG00000135976.16	ANKRD36	chr2	protein_coding	ankyrin repeat domain 36
IntronR	novel_IR_4962	chr20	35272145	35278009	-	ENST00000566203.6	novel	1.26	56.43	44.96	y	1.29	67.84	52.49	y	1.37	83.85	61.07	y	1.13	60.04	52.95	y	1.1	64.06	58	y	1.02	66.24	64.97	n	0.00858331	-4.81032	down	ENSG00000126005.15	MMP24-AS1	chr20	antisense	MMP24 antisense RNA 1
IntronR	novel_IR_5022	chr20	46364720	46366965	+	ENST00000612368.1	novel	-	-	-	-	1	0.09	0	n	1	0.33	0	n	0.33	0.19	0.58	y	0.35	0.3	0.85	y	-	-	-	-	0.00964502	-66	down	ENSG00000273828.1	RP11-394O2.3	chr20	antisense	--
IntronR	novel_IR_5055	chr20	58701158	58705498	+	ENST00000530122.1	novel	0.35	31.41	89.16	y	0.34	28.54	84.12	n	0.34	44.54	131.41	y	0.29	27.72	94.97	n	0.25	26.02	102.75	y	0.3	29.83	100.08	n	0.0478908	-4.05081	down	ENSG00000254995.4	STX16-NPEPL1	chr20	protein_coding	STX16-NPEPL1 readthrough (NMD candidate)
IntronR	novel_IR_5103	chr20	8649449	8657184	+	ENST00000378641.7	novel	1.74	1.3	0.75	y	1.04	0.69	0.67	n	1.07	1.56	1.46	n	0.22	0.54	2.39	n	0.17	0.64	3.85	n	0.78	0.68	0.88	n	0.0423637	-2.97045	down	ENSG00000182621.16	PLCB1	chr20	protein_coding	phospholipase C, beta 1 (phosphoinositide-specific)
IntronR	novel_IR_5226	chr22	20319786	20319879	-	ENST00000405465.3	novel	0.2	34.93	173.63	y	0.2	42.84	213.49	y	0.18	58.39	328.46	n	0.17	35.61	205.57	n	0.17	35.66	214.16	n	0.15	38.74	254.81	n	0.0334717	-3.18198	down	ENSG00000128185.9	DGCR6L	chr22	protein_coding	DiGeorge syndrome critical region gene 6-like
IntronR	novel_IR_5280	chr22	27919545	27935151	+	ENST00000454741.5	novel	0.39	2.01	5.17	n	0.33	2.31	7.06	n	0.37	3.54	9.5	n	0.24	1.81	7.57	n	0.24	2.13	9	n	0.3	2.21	7.3	y	0.018448	-3.875	down	ENSG00000235954.6	TTC28-AS1	chr22	processed_transcript	TTC28 antisense RNA 1
IntronR	novel_IR_5283	chr22	28800737	28838860	+	ENST00000418292.1	novel	1	0.15	0	n	1	0.16	0	n	1	0.3	0	n	0.48	0.22	0.45	y	0.6	0.26	0.43	y	0.47	0.24	0.51	y	0.00738469	-11.5723	down	ENSG00000226471.6	CTA-292E10.6	chr22	antisense	--
IntronR	novel_IR_5324	chr22	38126449	38129454	-	ENST00000335539.7	novel	0.38	0.29	0.78	y	0.32	0.26	0.84	n	0.27	0.36	1.34	n	0.06	0.38	6.66	n	0.03	0.08	2.79	n	0.13	0.28	2.15	n	0.00459838	-5.75224	down	ENSG00000184381.18	PLA2G6	chr22	protein_coding	phospholipase A2, group VI (cytosolic, calcium-independent)
IntronR	novel_IR_5328	chr22	38297155	38298786	-	ENST00000405675.7	novel	0.23	34.81	149.74	y	0.25	43.92	178.13	y	0.24	64.81	267.1	y	0.21	37.37	179.25	y	0.22	37.25	170.44	y	0.22	40.69	186.93	y	0.0356527	-3.5	down	ENSG00000213923.10	CSNK1E	chr22	protein_coding	casein kinase 1, epsilon
IntronR	novel_IR_5341	chr22	39043090	39044941	+	ENST00000308521.9	novel	0.3	4.13	13.87	y	0.4	5.33	13.49	y	0.34	6.65	19.82	y	0.2	2.88	14.59	n	0.24	2.21	9.1	y	0.23	3.95	17.2	y	0.0364573	-3.92199	down	ENSG00000128394.16	APOBEC3F	chr22	protein_coding	apolipoprotein B mRNA editing enzyme, catalytic polypeptide-like 3F
IntronR	novel_IR_5346	chr22	40021963	40029516	+	ENST00000333407.10	novel	0.28	1.29	4.58	y	0.29	1.58	5.46	y	0.31	2.34	7.5	y	0.21	1	4.84	n	0.23	1.3	5.74	y	0.26	1.57	6.11	n	0.0332046	-3.53009	down	ENSG00000133477.16	FAM83F	chr22	protein_coding	family with sequence similarity 83, member F
IntronR	novel_IR_5618	chr3	33596734	33602952	-	ENST00000468888.6	novel	0.27	0.79	2.94	n	0.33	0.98	2.94	y	0.21	1.14	5.32	n	0.08	0.58	6.88	n	0.17	1.01	5.83	n	0.11	0.95	8.57	n	0.029199	-3.44124	down	ENSG00000163539.15	CLASP2	chr3	protein_coding	cytoplasmic linker associated protein 2
IntronR	novel_IR_5671	chr3	49018318	49018400	-	ENST00000440857.5	novel	0.24	6.94	29.21	y	0.25	9.62	38.86	y	0.2	12.28	61.69	n	0.1	5.11	49.06	n	0.07	2.48	36.71	n	0.14	5.67	39.5	n	0.00911882	-4.98964	down	ENSG00000178149.16	DALRD3	chr3	protein_coding	DALR anticodon binding domain containing 3
IntronR	novel_IR_5702	chr3	51275206	51277608	+	ENST00000266037.9	novel	0.61	0.27	0.44	y	1	0.12	0	n	1	0.12	0	n	0.23	0.24	1.04	y	0	0	0.29	n	0.1	0.06	0.57	n	0.0140046	-5.20336	down	ENSG00000088538.12	DOCK3	chr3	protein_coding	dedicator of cytokinesis 3
IntronR	novel_IR_5704	chr3	51671288	51672341	+	ENST00000457573.5	novel	0.65	4.21	6.49	y	0.57	3.3	5.78	n	0.62	7.81	12.5	y	0.37	5.61	15.24	y	0.07	0.96	14.43	n	0.26	3.83	14.66	y	0.0415502	-4.19072	down	ENSG00000164081.12	TEX264	chr3	protein_coding	testis expressed 264
IntronR	novel_IR_5744	chr3	57663716	57666123	-	ENST00000311128.9	novel	1.3	0.78	0.6	y	1	0.23	0	n	1	0.12	0	n	0	0	1.25	n	0.05	0.12	2.67	n	0.03	0.12	4.03	n	0.00757126	-10.6218	down	ENSG00000174839.12	DENND6A	chr3	protein_coding	DENN/MADD domain containing 6A
IntronR	novel_IR_5813	chr4	127886626	127887396	+	ENST00000507249.5	novel	0.36	5.23	14.54	y	0.37	3.44	9.3	y	0.37	10.23	27.98	y	0.2	3.4	17.04	n	0.22	3.2	14.26	y	0.19	2.58	13.93	n	0.00100985	-17.3241	down	ENSG00000142731.10	PLK4	chr4	protein_coding	polo-like kinase 4
IntronR	novel_IR_5814	chr4	127886728	127887396	+	ENST00000270861.9	novel	0.23	3.39	14.79	y	0.2	1.97	9.64	y	0.13	3.85	30.17	n	0.06	1	17.23	n	0.05	0.79	14.68	n	0.07	0.95	13.86	n	0.0460582	-4.1964	down	ENSG00000142731.10	PLK4	chr4	protein_coding	polo-like kinase 4
IntronR	novel_IR_5834	chr4	151677431	151677539	+	ENST00000514269.1	novel	-	-	-	-	0.69	0.33	0.47	n	0.81	1.57	1.95	y	0	0	0.44	n	0.06	0.07	1.24	n	-	-	-	-	0.0225398	-10.7331	down	ENSG00000251455.1	RP11-164P12.3	chr4	antisense	--
IntronR	novel_IR_5864	chr4	185639035	185646668	-	ENST00000437304.6	novel	0.28	0.27	0.97	y	0.2	0.51	2.59	n	0.31	0.71	2.29	y	0.1	0.32	3.38	n	0.11	0.15	1.37	n	0.1	0.38	3.74	n	0.0384083	-4.84873	down	ENSG00000154556.17	SORBS2	chr4	protein_coding	sorbin and SH3 domain containing 2
IntronR	novel_IR_5970	chr4	88262726	88265001	-	ENST00000608933.5	novel	0.19	2.59	13.72	n	0.2	2.64	13.17	y	0.14	3.33	23.64	n	0.11	2.29	20.17	n	0.08	1.28	16.82	n	0.12	2.7	21.93	n	0.0371277	-3.31662	down	ENSG00000163644.14	PPM1K	chr4	protein_coding	protein phosphatase, Mg2+/Mn2+ dependent, 1K
IntronR	novel_IR_6002	chr5	132365027	132366568	-	ENST00000621103.4	novel	0.48	1.83	3.81	y	0.32	2.18	6.85	y	0.48	4.76	9.92	y	0.22	1.89	8.57	y	0.3	2.93	9.82	y	0.19	2.47	13.12	n	0.0491305	-3.0338	down	ENSG00000233006.6	AC034220.3	chr5	processed_transcript	--
IntronR	novel_IR_6058	chr5	141223540	141245483	+	ENST00000624396.1	novel	2.55	0.82	0.32	y	2.33	1.01	0.43	y	1.66	1.36	0.82	y	1.38	1.43	1.03	n	0.83	0.85	1.03	n	0.66	0.99	1.5	y	0.0255197	-3.54859	down	ENSG00000279983.1	CH17-140K24.8	chr5	protein_coding	--
IntronR	novel_IR_6305	chr6	150001128	150001351	-	ENST00000403651.2	novel	1.19	1.98	1.66	n	1.77	3.61	2.04	y	2.66	1.99	0.75	n	0.5	1.09	2.2	y	0	0	2.26	n	0	0	1.91	n	0.0431332	-3.71963	down	ENSG00000218358.2	RAET1K	chr6	transcribed_unprocessed_pseudogene	retinoic acid early transcript 1K pseudogene
IntronR	novel_IR_6393	chr6	3016985	3019479	+	ENST00000380455.8	novel	0.5	15.84	31.43	y	0.48	19.53	40.29	y	0.45	23.34	51.34	y	0.42	13.45	31.67	y	0.43	15.59	36.52	y	0.41	14.86	36.41	y	0.0451284	-3.62441	down	ENSG00000124588.19	NQO2	chr6	protein_coding	NAD(P)H dehydrogenase, quinone 2
IntronR	novel_IR_6536	chr7	100202603	100223570	-	ENST00000436886.6	novel	0.7	0.87	1.25	y	0.55	1.39	2.5	y	0.64	1.73	2.73	y	0.35	1.25	3.55	y	0.43	1.37	3.19	y	0.38	1.24	3.28	n	0.015349	-4.92166	down	ENSG00000239521.7	GATS	chr7	protein_coding	GATS, stromal antigen 3 opposite strand
IntronR	novel_IR_6885	chr8	11798147	11801922	-	ENST00000531395.1	novel	1.3	0.12	0.09	y	1.54	0.1	0.07	y	1	0.17	0	n	0.78	0.08	0.1	n	0.76	0.42	0.56	y	0.48	0.18	0.37	y	0.0390688	-3.30092	down	ENSG00000255046.1	RP11-297N6.4	chr8	lincRNA	--
IntronR	novel_IR_6924	chr8	143378346	143378696	+	ENST00000620174.1	novel	0.33	0.84	2.58	n	0.25	0.72	2.89	y	0.51	3.04	5.96	y	0.07	0.38	5.8	n	0	0	1.86	n	0.16	1.2	7.71	n	0.0437151	-3.19396	down	ENSG00000158106.12	RHPN1	chr8	protein_coding	rhophilin, Rho GTPase binding protein 1
IntronR	novel_IR_6980	chr8	144837507	144845979	+	ENST00000525266.5	novel	6.12	16.92	2.76	n	5.48	16.78	3.06	y	5.88	23.24	3.95	n	5	15.61	3.12	n	4.83	14.98	3.1	n	4.82	16.72	3.47	n	0.0281182	-4.82301	down	ENSG00000147789.15	ZNF7	chr8	protein_coding	zinc finger protein 7
IntronR	novel_IR_7066	chr8	94950809	94951050	+	ENST00000523905.5	novel	0.8	3.02	3.75	y	0.65	2.92	4.48	y	0.51	2.92	5.7	n	0.18	0.88	4.99	n	0.38	2.83	7.55	n	0.41	2.51	6.08	n	0.0416562	-2.98496	down	ENSG00000253878.5	RP11-347C18.3	chr8	sense_intronic	--
IntronR	novel_IR_7242	chr9	137433074	137433205	+	ENST00000341349.6	novel	0.2	1.58	7.77	n	0.29	2.73	9.3	n	0.32	6.03	18.8	y	0	0	13.37	n	0.15	1.36	8.95	n	0	0	14.92	n	0.0274169	-3.56887	down	ENSG00000188747.8	NOXA1	chr9	protein_coding	NADPH oxidase activator 1
IntronR	novel_IR_7327	chr9	86322475	86322873	-	ENST00000277141.10	novel	0.51	0.7	1.38	n	0.42	1.09	2.56	y	0.31	1.48	4.81	n	0.19	0.53	2.74	n	0	0	1.07	n	0.1	0.24	2.49	n	0.0165977	-3.97215	down	ENSG00000083223.17	ZCCHC6	chr9	protein_coding	zinc finger, CCHC domain containing 6
IntronR	novel_IR_7369	chrX	101400757	101401632	-	ENST00000218516.3	novel	0.37	92.62	250.31	y	0.4	109.23	274.41	y	0.38	164.16	436.35	y	0.34	97.96	288.41	y	0.29	97.01	330.36	y	0.33	108.97	328.76	y	0.0333003	-3.59066	down	ENSG00000102393.9	GLA	chrX	protein_coding	galactosidase, alpha
IntronR	novel_IR_7480	chrX	48806464	48806609	+	ENST00000334136.9	novel	0.72	9.06	12.54	y	0.62	2.74	4.43	y	0.85	6.3	7.41	y	0	0	5.91	n	0.12	0.98	7.9	n	0.11	1.01	9.19	n	0.00266717	-8.49768	down	ENSG00000094631.18	HDAC6	chrX	protein_coding	histone deacetylase 6
IntronR	known_IR_28	chr1	150266194	150266533	-	ENST00000414276.6	known	0.57	683.98	1203.17	y	0.56	776.86	1383.3	y	0.55	1047.51	1912.84	y	0.6	791.84	1310.44	y	0.59	850.39	1435.08	y	0.59	911.66	1550.6	y	0.0131721	5	up	ENSG00000117362.12	APH1A	chr1	protein_coding	APH1A gamma secretase subunit
IntronR	known_IR_135	chr10	100984357	100984490	+	ENST00000613292.1	known	0.08	2.31	30.79	n	0.21	6.65	31.11	y	0.06	2.22	39.73	n	0.33	10.67	32.64	y	0.53	20.49	38.53	y	0.35	13.16	38.11	y	0.0256292	3.62447	up	ENSG00000095539.15	SEMA4G	chr10	protein_coding	sema domain, immunoglobulin domain (Ig), transmembrane domain (TM) and short cytoplasmic domain, (semaphorin) 4G
IntronR	known_IR_166	chr10	70151378	70151419	-	ENST00000431664.6	known	0.26	59.5	224.78	y	0.16	35.52	220.28	n	0.24	77.92	330.38	y	0.33	75	224.22	y	0.33	71.05	216.21	y	0.36	101.2	281.65	y	0.0478334	3.73303	up	ENSG00000079332.14	SAR1A	chr10	protein_coding	secretion associated, Ras related GTPase 1A
IntronR	known_IR_295	chr11	824844	824846	+	ENST00000617551.1	known	1.36	315	231.55	y	1.32	408	310.19	y	1.33	578	435.25	y	1.45	420	289.71	y	1.43	493	344.53	y	1.51	521	345.5	y	0.0188999	4.71332	up	ENSG00000177666.15	PNPLA2	chr11	protein_coding	patatin-like phospholipase domain containing 2
IntronR	known_IR_356	chr12	54181647	54182504	-	ENST00000513838.5	known	1.22	97.8	80.17	y	1.27	135.74	107.16	y	1.26	178.65	141.78	y	1.43	124.31	86.82	y	1.42	139.62	98.5	y	1.46	141.89	97.49	y	0.000850733	9.60392	up	ENSG00000123415.14	SMUG1	chr12	protein_coding	single-strand-selective monofunctional uracil-DNA glycosylase 1
IntronR	known_IR_397	chr13	27435485	27435487	+	ENST00000439403.5	known	1.12	1785	1595.3	y	1.11	2181	1972.2	y	1.13	2874	2546.03	y	1.17	1867	1595.43	y	1.16	1953	1681.87	y	1.18	2216	1874.17	y	0.00360223	6.12372	up	ENSG00000122034.12	GTF3A	chr13	protein_coding	general transcription factor IIIA
IntronR	known_IR_410	chr13	77698203	77698270	+	ENST00000466548.5	known	0.65	1.79	2.74	n	0.45	0.64	1.42	n	0.29	1.24	4.28	n	1.17	3.77	3.24	y	1.21	3	2.47	y	0.78	3.88	5	y	0.0297128	3.42609	up	ENSG00000139737.21	SLAIN1	chr13	protein_coding	SLAIN motif family, member 1
IntronR	known_IR_417	chr14	20996711	20996812	+	ENST00000556670.6	known	0.49	154.79	314.85	y	0.46	194.32	420.9	y	0.5	257.82	515.65	y	0.54	179.78	330.65	y	0.54	215.33	399.67	y	0.54	235.47	437.78	y	0.0421585	4.71495	up	ENSG00000165792.17	METTL17	chr14	protein_coding	methyltransferase like 17
IntronR	known_IR_437	chr14	24310255	24310599	+	ENST00000543919.1	known	0.34	1.43	4.18	y	0.62	3.4	5.5	y	0.5	2.5	5.01	y	1.6	3.49	2.18	y	1.16	3.26	2.81	y	0.95	2.66	2.79	y	0.0435386	3.60612	up	ENSG00000213906.9	LTB4R2	chr14	protein_coding	leukotriene B4 receptor 2
IntronR	known_IR_496	chr15	74722356	74722441	-	ENST00000612821.4	known	1.14	7.93	6.98	y	0.88	5.26	5.95	y	1.24	15.69	12.69	y	1.54	18.17	11.81	y	1.52	16.73	10.97	y	1.37	17.32	12.6	y	0.0487997	3.25125	up	ENSG00000140465.13	CYP1A1	chr15	protein_coding	cytochrome P450, family 1, subfamily A, polypeptide 1
IntronR	known_IR_548	chr16	2460170	2460283	+	ENST00000569496.5	known	0.07	1.01	14.15	n	0.06	0.95	16.35	n	0.18	4.14	23.29	n	0.33	4.78	14.37	y	0.34	5.03	14.89	y	0.38	5.96	15.51	y	0.0137523	5.96309	up	ENSG00000162062.14	C16orf59	chr16	protein_coding	chromosome 16 open reading frame 59
IntronR	known_IR_557	chr16	28836122	28836728	+	ENST00000340394.12	known	0.26	152.56	580.67	y	0.29	200.2	696.89	y	0.28	250.43	896.28	y	0.35	207.04	586.33	y	0.32	225.98	700.6	y	0.32	211.65	662.79	y	0.0166297	4	up	ENSG00000168488.18	ATXN2L	chr16	protein_coding	ataxin 2-like
IntronR	known_IR_558	chr16	28836122	28836751	+	ENST00000382686.8	known	0.27	159.38	588.89	y	0.3	210.33	704.36	y	0.29	262.72	906.82	y	0.37	216.59	590.36	y	0.33	234	709.29	y	0.33	222.16	668.37	y	0.0302325	3.54475	up	ENSG00000168488.18	ATXN2L	chr16	protein_coding	ataxin 2-like
IntronR	known_IR_560	chr16	28836176	28836728	+	ENST00000564304.5	known	0.31	154.33	490.17	y	0.33	203.14	615.54	y	0.34	256.97	754.92	y	0.39	213.82	545.85	y	0.38	233.36	610.23	y	0.37	217.78	593.08	y	0.0105551	5.05964	up	ENSG00000168488.18	ATXN2L	chr16	protein_coding	ataxin 2-like
IntronR	known_IR_561	chr16	28836176	28836751	+	ENST00000325215.10	known	0.29	161.72	559.09	y	0.32	214.11	669.38	y	0.31	270.15	859.23	y	0.4	223.99	560.73	y	0.36	241.83	672.59	y	0.36	229.03	634.3	y	0.0187996	4.17029	up	ENSG00000168488.18	ATXN2L	chr16	protein_coding	ataxin 2-like
IntronR	known_IR_591	chr16	3065710	3065784	+	ENST00000444393.7	known	0.18	90.33	494.4	n	0.16	96.75	618.97	n	0.2	155.25	788.38	n	0.25	175.08	697.65	y	0.23	169.62	738.84	y	0.23	173.92	759.46	y	0.0209599	4.25	up	ENSG00000008517.16	IL32	chr16	protein_coding	interleukin 32
IntronR	known_IR_615	chr16	58523466	58523468	-	ENST00000245138.8	known	0.97	969	996.84	y	0.95	977	1032.36	y	0.96	1429	1483.22	y	0.99	984	989.2	y	0.98	1005	1024.81	y	0.98	1080	1097.48	y	0.0356527	3.5	up	ENSG00000125107.16	CNOT1	chr16	protein_coding	CCR4-NOT transcription complex, subunit 1
IntronR	known_IR_626	chr16	74452131	74453171	-	ENST00000205061.9	known	4.8	234.55	48.89	y	5.04	251.2	49.85	y	4.96	344.18	69.37	y	5.46	258.29	47.35	y	5.75	290.91	50.57	y	5.5	297.27	54.07	y	0.00616512	5.53914	up	ENSG00000090863.11	GLG1	chr16	protein_coding	golgi glycoprotein 1
IntronR	known_IR_674	chr17	41755432	41755730	-	ENST00000393930.5	known	0.18	385.46	2146.91	n	0.18	489.09	2685.78	n	0.2	640.85	3202.71	y	0.21	525.74	2456.04	y	0.21	581.28	2786.59	y	0.22	619.18	2879.23	y	0.038561	3.57771	up	ENSG00000173801.16	JUP	chr17	protein_coding	junction plakoglobin
IntronR	known_IR_716	chr17	7394159	7394477	-	ENST00000324822.15	known	0.46	37.3	81.87	y	0.44	47.49	108.16	y	0.4	49.36	124.67	y	0.57	48.63	85.81	y	0.58	67.59	116.69	y	0.5	54.1	107.7	y	0.0234111	3.79628	up	ENSG00000187838.16	TMEM256-PLSCR3	chr17	protein_coding	TMEM256-PLSCR3 readthrough (NMD candidate)
IntronR	known_IR_759	chr17	81929859	81929978	+	ENST00000583492.1	known	0.38	18.32	48.07	y	0.54	29.56	54.85	y	0.45	33.41	74.15	y	0.81	44.77	55.01	y	0.73	43.23	59.26	y	0.69	36.12	52.29	y	0.00940175	4.92435	up	ENSG00000265688.1	MAFG-AS1	chr17	antisense	MAFG antisense RNA 1 (head to head)
IntronR	known_IR_783	chr19	1244440	1244691	+	ENST00000591660.5	known	0.43	570.3	1336.35	y	0.43	828.82	1911.25	y	0.45	1018.3	2281.7	y	0.46	745.46	1629.82	y	0.49	910.97	1864.42	y	0.49	919.89	1884.17	y	0.0285822	3.60555	up	ENSG00000099624.7	ATP5D	chr19	protein_coding	ATP synthase, H+ transporting, mitochondrial F1 complex, delta subunit
IntronR	known_IR_784	chr19	1244440	1244737	+	ENST00000395633.5	known	0.4	559.96	1393.33	y	0.42	834.13	1965.13	y	0.42	1002.28	2361.97	y	0.44	738.75	1668.83	y	0.48	905.89	1894.92	y	0.48	908.95	1913.07	y	0.038561	3.57771	up	ENSG00000099624.7	ATP5D	chr19	protein_coding	ATP synthase, H+ transporting, mitochondrial F1 complex, delta subunit
IntronR	known_IR_804	chr19	19201563	19201931	-	ENST00000420605.7	known	0.99	181.4	183.71	y	1.05	248.62	235.98	y	1.05	361.89	343.25	y	1.18	199.75	169.71	y	1.1	213.89	194.4	y	1.12	215.54	192.75	y	0.0312835	3.30461	up	ENSG00000184162.14	NR2C2AP	chr19	protein_coding	nuclear receptor 2C2-associated protein
IntronR	known_IR_929	chr19	868251	868416	-	ENST00000589119.5	known	0.83	176.23	212.53	y	0.87	287.49	328.57	y	0.99	340.76	344.88	y	1.05	248.62	235.71	y	1.13	300.69	265.94	y	1.11	294.28	264.43	y	0.0349382	3.72104	up	ENSG00000175221.14	MED16	chr19	protein_coding	mediator complex subunit 16
IntronR	known_IR_932	chr19	9818617	9818754	-	ENST00000588922.5	known	0.18	4.21	23.45	n	0.19	5.11	27.25	n	0.2	7.37	37.13	n	0.28	11.69	42.5	y	0.27	9.15	33.66	y	0.24	8.84	37.05	y	0.0131995	5.5	up	ENSG00000127452.8	FBXL12	chr19	protein_coding	F-box and leucine-rich repeat protein 12
IntronR	known_IR_1027	chr20	2658522	2658759	-	ENST00000474315.5	known	0.92	744.04	806.34	y	0.97	1070.56	1102.89	y	0.97	1218.64	1249.97	y	1.04	921.72	882.37	y	1.04	1005.38	967.95	y	1	1011.01	1008.69	y	0.0284312	3.43582	up	ENSG00000101365.20	IDH3B	chr20	protein_coding	isocitrate dehydrogenase 3 (NAD+) beta
IntronR	known_IR_1064	chr21	41991889	41992493	-	ENST00000398505.7	known	0.2	1.87	9.44	n	0.08	0.59	7.09	n	0.26	3.17	12.01	y	0.47	3.96	8.43	y	0.4	2.49	6.29	y	0.39	3.33	8.48	y	0.0288095	4.09594	up	ENSG00000173276.13	ZBTB21	chr21	protein_coding	zinc finger and BTB domain containing 21
IntronR	known_IR_1425	chr7	6577498	6577590	+	ENST00000396707.6	known	0.19	4.19	21.99	n	0.11	2.58	24.58	n	0.29	12.58	43.1	y	0.48	15.73	33.09	y	0.41	10.91	26.52	y	0.45	10.16	22.52	y	0.0281473	4.47412	up	ENSG00000136247.14	ZDHHC4	chr7	protein_coding	zinc finger, DHHC-type containing 4
IntronR	known_IR_1446	chr8	102207185	102207326	-	ENST00000621845.1	known	0.59	15.76	26.66	y	0.73	6.66	9.15	y	0.55	20.11	36.45	y	0.93	14.25	15.35	y	0.93	11.92	12.82	y	0.9	19.31	21.58	y	0.0288367	5.34749	up	ENSG00000048392.11	RRM2B	chr8	protein_coding	ribonucleotide reductase M2 B (TP53 inducible)
IntronR	known_IR_1463	chr8	22603288	22603291	+	ENST00000615223.2	known	0.65	55	84.98	n	0.54	54	100.17	n	0.54	66.5	124.15	n	0.74	80	108.03	y	0.69	76	109.36	y	0.78	89	113.86	y	0.028039	3.558	up	ENSG00000241852.9	C8orf58	chr8	protein_coding	chromosome 8 open reading frame 58
IntronR	known_IR_1563	chrX	48922910	48923137	-	ENST00000396743.7	known	1.32	232.32	176.04	y	1.26	273.91	218.09	y	1.28	344.93	270.45	y	1.33	239.96	180.47	y	1.35	293.29	217.54	y	1.39	312.37	225.15	y	0.0485021	2.80624	up	ENSG00000068308.13	OTUD5	chrX	protein_coding	OTU deubiquitinase 5
IntronR	novel_IR_38	chr1	110345649	110346308	+	ENST00000369784.7	novel	0.34	66.26	196.33	y	0.31	44.08	142.02	y	0.34	89.29	260.74	y	0.42	62.31	148.95	y	0.4	61.28	151.37	y	0.45	87.71	195.01	y	0.00850605	5.2915	up	ENSG00000162775.14	RBM15	chr1	protein_coding	RNA binding motif protein 15
IntronR	novel_IR_279	chr1	156466498	156467631	-	ENST00000368240.6	novel	0.53	56.01	105.79	y	0.48	66.22	137.61	y	0.53	99	187.86	y	0.64	62.6	97.69	y	0.59	65.5	111.59	y	0.56	67.92	121.38	y	0.0495033	2.90619	up	ENSG00000116604.17	MEF2D	chr1	protein_coding	myocyte enhancer factor 2D
IntronR	novel_IR_422	chr1	202011584	202014886	+	ENST00000504773.1	novel	0.24	281.75	1189.66	y	0.23	311.89	1383.17	y	0.25	441.92	1750.49	y	0.26	296.4	1131.45	y	0.27	326.69	1219.11	y	0.26	314.96	1232.63	y	0.0356527	3.5	up	ENSG00000249007.1	RP11-510N19.5	chr1	sense_intronic	--
IntronR	novel_IR_454	chr1	206909868	206910210	-	ENST00000367091.7	novel	0	0	0.37	n	0	0	3.84	n	0.33	0.89	2.67	y	0.68	1.46	2.16	y	1.38	0.86	0.63	y	0.77	0.82	1.06	n	0.0440622	3.38954	up	ENSG00000162894.11	FCMR	chr1	protein_coding	Fc fragment of IgM receptor
IntronR	novel_IR_476	chr1	213005454	213007129	-	ENST00000366962.7	novel	0.14	5.54	39.44	n	0.21	4.71	22.23	y	0.18	7.47	41.68	n	0.26	5.85	22.89	y	0.29	6.47	22.56	y	0.28	8.03	28.37	y	0.0246607	4.52267	up	ENSG00000174606.12	ANGEL2	chr1	protein_coding	angel homolog 2 (Drosophila)
IntronR	novel_IR_482	chr1	2183704	2183991	-	ENST00000444529.1	novel	0.3	0.39	1.3	n	0	0	0.01	n	-	-	-	-	0.78	1.03	1.32	n	1.38	1.77	1.28	y	1.13	2.13	1.89	n	0.0278716	4.12071	up	ENSG00000182873.5	RP11-181G12.2	chr1	antisense	--
IntronR	novel_IR_698	chr1	46034266	46034827	+	ENST00000372009.3	novel	0.32	62.77	193.74	y	0.31	75.08	245.51	y	0.32	112.56	350.2	y	0.37	88.38	236.21	y	0.39	103.86	265.45	y	0.39	100.25	259.57	y	0.0031866	8.94427	up	ENSG00000086015.20	MAST2	chr1	protein_coding	microtubule associated serine/threonine kinase 2
IntronR	novel_IR_988	chr10	5861896	5862198	-	ENST00000430852.1	novel	0.08	0.54	6.59	n	0.59	1.27	2.16	y	0.37	1.4	3.74	y	1.27	2.57	2.03	y	1.05	2.97	2.83	y	1.13	3.21	2.84	y	0.0193	4.98739	up	ENSG00000240180.1	RP11-318E3.4	chr10	processed_pseudogene	--
IntronR	novel_IR_1119	chr11	119028834	119029392	-	ENST00000538950.5	novel	0.21	7.93	38.53	y	0.2	8.05	39.96	y	0.29	14.75	50.06	y	0.39	12.07	30.67	y	0.38	10.43	27.15	y	0.29	12.3	42.67	y	0.0489278	2.81113	up	ENSG00000137700.16	SLC37A4	chr11	protein_coding	solute carrier family 37 (glucose-6-phosphate transporter), member 4
IntronR	novel_IR_1248	chr11	532522	532631	-	ENST00000311189.7	novel	0.16	51.59	332.1	n	0.13	54.62	414.39	n	0.15	82.69	535.56	n	0.2	74.1	379.85	n	0.2	91.59	454.6	y	0.2	99.7	493.33	y	0.026271	6.04743	up	ENSG00000174775.16	HRAS	chr11	protein_coding	Harvey rat sarcoma viral oncogene homolog
IntronR	novel_IR_1293	chr11	63998872	63998955	-	ENST00000255681.6	novel	0.02	0.54	29.87	n	0.07	3.04	42.33	n	0.11	5.91	56.27	n	0.2	4.85	24.01	y	0.14	7.17	51.85	n	0.21	9.96	47.86	y	0.0277489	3.43203	up	ENSG00000133315.10	MACROD1	chr11	protein_coding	MACRO domain containing 1
IntronR	novel_IR_1300	chr11	64226427	64226635	+	ENST00000441250.6	novel	0.2	25.62	127.3	y	0.22	36.66	168.01	y	0.22	55.25	251.51	y	0.31	62.9	204.99	y	0.35	77.22	221.82	y	0.35	81.11	232.02	y	0.00397983	8.27345	up	ENSG00000149761.8	NUDT22	chr11	protein_coding	nudix (nucleoside diphosphate linked moiety X)-type motif 22
IntronR	novel_IR_1512	chr12	103911498	103915078	-	ENST00000551270.1	novel	0.08	0.17	2.16	n	0.38	0.19	0.52	n	0.35	0.21	0.59	y	2.06	0.62	0.3	n	1	0.16	0	n	1.66	0.38	0.23	y	0.0419468	4.02964	up	ENSG00000214198.7	TTC41P	chr12	unitary_pseudogene	tetratricopeptide repeat domain 41, pseudogene
IntronR	novel_IR_1544	chr12	112208630	112210015	-	ENST00000550722.5	novel	0	0	1.26	n	0.13	0.42	3.15	n	0	0	1.18	n	0.62	0.34	0.55	n	0.45	0.57	1.25	y	1	0.34	0	n	0.0496536	3.84328	up	ENSG00000173064.10	HECTD4	chr12	protein_coding	HECT domain containing E3 ubiquitin protein ligase 4
IntronR	novel_IR_1593	chr12	122483344	122483460	-	ENST00000633063.1	novel	0.02	0.35	23.07	n	0.01	0.1	7.38	n	0.02	0.74	29.95	n	0.19	3.65	19.69	n	0.22	2.55	11.7	y	0.1	2.38	25.06	n	0.0499879	4.23464	up	ENSG00000033030.13	ZCCHC8	chr12	protein_coding	zinc finger, CCHC domain containing 8
IntronR	novel_IR_1697	chr12	49792051	49792446	-	ENST00000335999.6	novel	0.04	0.42	9.33	n	0.02	0.28	15.33	n	0.03	0.4	14.58	n	0.25	2.96	11.85	y	0.15	2.28	14.82	n	0.2	2.79	13.65	y	0.0239863	5.77461	up	ENSG00000167566.16	NCKAP5L	chr12	protein_coding	NCK-associated protein 5-like
IntronR	novel_IR_1772	chr12	56163765	56164648	-	ENST00000347471.8	novel	0.36	41.03	112.55	y	0.33	39.19	119.49	y	0.39	73.07	186	y	0.47	51.49	110.56	y	0.49	61.79	125.04	y	0.42	57.91	138.88	y	0.0222013	3.69274	up	ENSG00000139613.11	SMARCC2	chr12	protein_coding	SWI/SNF related, matrix associated, actin dependent regulator of chromatin, subfamily c, member 2
IntronR	novel_IR_1980	chr13	19958841	19959958	+	ENST00000610343.4	novel	-	-	-	-	0.37	0.38	1.04	n	0.38	0.69	1.81	n	1.38	0.39	0.28	n	1	0.25	0	n	0.91	1.36	1.49	y	0.0374581	5.00754	up	ENSG00000121741.16	ZMYM2	chr13	protein_coding	zinc finger, MYM-type 2
IntronR	novel_IR_2088	chr14	104112000	104112524	+	ENST00000551177.5	novel	0	0	0.4	n	0	0	1.04	n	0.24	0.23	0.94	n	0.54	0.33	0.6	y	0.5	0.32	0.65	n	0.71	0.49	0.69	n	0.00900106	4.90167	up	ENSG00000166183.15	ASPG	chr14	protein_coding	asparaginase
IntronR	novel_IR_2151	chr14	24103255	24103842	+	ENST00000559250.5	novel	0.62	636.27	1025.08	y	0.59	679.2	1151.77	y	0.63	768.24	1212.97	y	0.66	471.08	718.78	y	0.67	450.94	669.2	y	0.65	384.81	590.7	y	0.0421716	3.5	up	ENSG00000100889.11	PCK2	chr14	protein_coding	phosphoenolpyruvate carboxykinase 2 (mitochondrial)
IntronR	novel_IR_2169	chr14	24307515	24307818	-	ENST00000554411.5	novel	0	0	0.67	n	0	0	4.39	n	0.13	0.78	6.04	n	0.47	0.75	1.6	y	0.27	0.56	2.08	y	0.58	0.19	0.33	n	0.0315383	3.94481	up	ENSG00000136305.11	CIDEB	chr14	protein_coding	cell death-inducing DFFA-like effector b
IntronR	novel_IR_2172	chr14	24315016	24315637	+	ENST00000396782.2	novel	0.38	5.97	15.58	y	0.4	11.08	27.6	y	0.48	15.3	31.76	y	0.54	10.26	19.05	y	0.61	14.35	23.55	y	0.66	11.54	17.36	y	0.0172393	3.95899	up	ENSG00000213903.8	LTB4R	chr14	protein_coding	leukotriene B4 receptor
IntronR	novel_IR_2298	chr14	74946275	74946379	-	ENST00000555567.5	novel	0	0	4.03	n	0	0	5.57	n	0	0	3.03	n	0.19	1.36	7.06	n	0.15	0.6	3.95	n	0.23	2	8.61	y	0.0144542	8.22724	up	ENSG00000119630.13	PGF	chr14	protein_coding	placental growth factor
IntronR	novel_IR_2776	chr16	30231584	30231748	-	ENST00000618637.1	novel	0	0	0.58	n	0	0	0.9	n	0	0	0.8	n	0.22	0.31	1.37	n	0.18	0.31	1.73	n	0.26	0.97	3.76	y	0.0108404	9.52628	up	ENSG00000198064.13	RP11-347C12.1	chr16	protein_coding	--
IntronR	novel_IR_2899	chr16	634956	635281	-	ENST00000301686.12	novel	0.16	45.44	282.39	n	0.18	67.63	379.59	n	0.17	81.64	471.88	n	0.2	60.99	306.8	n	0.24	78.51	332.83	y	0.21	92.15	428.88	y	0.0421716	3.5	up	ENSG00000130731.15	C16orf13	chr16	protein_coding	chromosome 16 open reading frame 13
IntronR	novel_IR_2912	chr16	666350	666673	+	ENST00000315764.8	novel	0.45	32.37	71.55	y	0.44	38.93	87.97	y	0.47	52.34	111.51	y	0.55	39.69	72.61	y	0.52	38.11	72.75	y	0.49	41.8	86.02	y	0.0421452	3.42997	up	ENSG00000161996.17	WDR90	chr16	protein_coding	WD repeat domain 90
IntronR	novel_IR_3249	chr17	40485007	40487036	-	ENST00000254051.10	novel	0.11	64.2	591.69	n	0.15	61.42	416.49	n	0.12	86.33	736.91	n	0.21	104.25	503.84	y	0.2	99.42	500.83	n	0.2	97.07	492.83	n	0.0178494	6.14701	up	ENSG00000131746.12	TNS4	chr17	protein_coding	tensin 4
IntronR	novel_IR_3495	chr17	75574668	75574874	+	ENST00000577200.5	novel	0.3	66.59	223.04	y	0.27	96.18	355.5	y	0.31	104.59	338.12	y	0.42	108.16	255.97	y	0.36	107.77	302.71	y	0.39	101.61	260.26	y	0.0132643	4.5853	up	ENSG00000073350.13	LLGL2	chr17	protein_coding	lethal giant larvae homolog 2 (Drosophila)
IntronR	novel_IR_3613	chr17	81936861	81937180	-	ENST00000402252.6	novel	0.17	23.19	137.56	n	0.18	19.46	108.65	n	0.17	35.98	206.84	n	0.21	30.02	142.11	y	0.2	23.73	119.49	n	0.21	28.13	133.71	y	0.00211065	7.07107	up	ENSG00000183010.16	PYCR1	chr17	protein_coding	pyrroline-5-carboxylate reductase 1
IntronR	novel_IR_3787	chr19	1206089	1206239	+	ENST00000586243.5	novel	0.12	9.31	80.67	n	0.14	11.26	79.77	n	0.17	24.01	138.14	n	0.18	19.17	108.34	n	0.2	21.03	106.43	n	0.22	22.85	103.53	y	0.0404668	3.05329	up	ENSG00000118046.14	STK11	chr19	protein_coding	serine/threonine kinase 11
IntronR	novel_IR_3853	chr19	17211774	17211895	+	ENST00000594824.5	novel	0.13	17.93	133.18	n	0.1	17.49	169.32	n	0.12	25.55	210.57	n	0.29	44.59	155.33	y	0.2	35.92	178.36	y	0.23	45.44	194.48	y	0.0326524	4.42235	up	ENSG00000099331.13	MYO9B	chr19	protein_coding	myosin IXB
IntronR	novel_IR_3854	chr19	17211786	17211895	+	ENST00000595618.5	novel	0.13	17.43	131.25	n	0.1	16.6	166.87	n	0.11	22.1	207.71	n	0.27	42.19	153.49	y	0.2	34.82	176	n	0.23	44.25	191.95	y	0.0155972	5.4272	up	ENSG00000099331.13	MYO9B	chr19	protein_coding	myosin IXB
IntronR	novel_IR_3873	chr19	1785297	1785469	-	ENST00000310127.10	novel	0.07	1.72	23.12	n	0.12	4.06	32.89	n	0.07	3.51	49.61	n	0.22	5.92	26.47	y	0.33	7.8	23.51	y	0.21	4.95	24	y	0.0338466	3.97779	up	ENSG00000130270.16	ATP8B3	chr19	protein_coding	ATPase, aminophospholipid transporter, class I, type 8B, member 3
IntronR	novel_IR_4162	chr19	45085640	45090069	-	ENST00000586556.1	novel	0.1	0.09	0.88	n	0	0	1.9	n	0.05	0.2	4.35	n	0.27	0.41	1.54	y	0.28	0.17	0.61	n	0.22	0.27	1.19	n	0.0062865	6.02197	up	ENSG00000267348.2	CTB-179K24.3	chr19	antisense	--
IntronR	novel_IR_4224	chr19	48742309	48743445	-	ENST00000332955.6	novel	0.91	4.02	4.4	y	0.55	2.86	5.16	y	0.61	2.89	4.74	n	1.2	2.56	2.14	y	1.04	2.55	2.45	y	1.26	2.46	1.96	n	0.0303421	3.68733	up	ENSG00000182264.8	IZUMO1	chr19	protein_coding	izumo sperm-egg fusion 1
IntronR	novel_IR_4304	chr19	52800239	52800492	-	ENST00000360272.5	novel	1.53	3.35	2.2	n	0.93	2.09	2.24	n	1.98	5.13	2.59	n	4.57	3.32	0.73	n	7.25	1.56	0.22	n	6.33	8.38	1.32	y	0.0178977	5.42117	up	ENSG00000189190.8	ZNF600	chr19	protein_coding	zinc finger protein 600
IntronR	novel_IR_4467	chr2	101152759	101154035	+	ENST00000610202.2	novel	0	0	1.96	n	0	0	2.32	n	0	0	3.01	n	0.23	0.46	2.01	y	0.17	0.29	1.72	n	0.19	0.23	1.19	n	0.0079479	11.15	up	ENSG00000272902.2	RP11-299H21.1	chr2	lincRNA	--
IntronR	novel_IR_4554	chr2	131529691	131530777	+	ENST00000409856.7	novel	0	0	0.99	n	0.15	0.66	4.31	n	0	0	0.72	n	-	-	-	-	0.35	0.54	1.55	n	0.42	0.37	0.89	y	0.0118993	5.48885	up	ENSG00000163040.14	CCDC74A	chr2	protein_coding	coiled-coil domain containing 74A
IntronR	novel_IR_4752	chr2	27628725	27629869	+	ENST00000515877.5	novel	0.31	5.86	18.82	y	0.4	6.34	15.82	y	0.4	11.74	29.1	y	0.54	8.98	16.72	y	0.5	8.95	17.95	y	0.44	7.99	17.98	y	0.0419004	2.95292	up	ENSG00000198522.13	GPN1	chr2	protein_coding	GPN-loop GTPase 1
IntronR	novel_IR_4811	chr2	61537587	61538138	-	ENST00000406957.5	novel	0.84	7.13	8.48	y	0.58	3.59	6.21	y	0.94	9.16	9.69	y	1.69	7.43	4.39	y	1.99	10.43	5.25	y	1.87	10.61	5.69	y	0.00181222	7.69177	up	ENSG00000082898.16	XPO1	chr2	protein_coding	exportin 1
IntronR	novel_IR_4844	chr2	74148223	74148350	+	ENST00000533563.1	novel	0.15	0.52	3.59	n	1.14	7.1	6.24	y	0.96	7.24	7.57	y	1.82	10.44	5.75	y	1.82	4.92	2.7	n	2.56	7.14	2.8	y	0.0301825	3.36015	up	ENSG00000225439.2	BOLA3-AS1	chr2	antisense	BOLA3 antisense RNA 1 (head to head)
IntronR	novel_IR_4933	chr20	2658522	2659525	-	ENST00000380851.9	novel	0.37	272.35	728.43	y	0.38	373.82	976.28	y	0.38	436.57	1144.43	y	0.41	324.31	791.05	y	0.4	354.26	876.52	y	0.39	359.33	918.93	y	0.0356527	3.5	up	ENSG00000101365.20	IDH3B	chr20	protein_coding	isocitrate dehydrogenase 3 (NAD+) beta
IntronR	novel_IR_5028	chr20	49241923	49251527	-	ENST00000371754.8	novel	4.11	46.93	11.42	y	3.54	50.69	14.3	n	4.94	70.29	14.24	y	5.45	65.06	11.94	y	7.03	68.75	9.78	y	7.62	68.99	9.05	y	0.039545	3.2734	up	ENSG00000124201.14	ZNFX1	chr20	protein_coding	zinc finger, NFX1-type containing 1
IntronR	novel_IR_5060	chr20	58883029	58888774	-	ENST00000441270.6	novel	0.33	0.37	1.1	n	0.41	0.35	0.84	n	0.21	0.98	4.58	n	1	0.35	0	n	0.76	0.59	0.78	y	1	0.64	0	n	0.00488819	6.10151	up	ENSG00000225806.7	RP1-309F20.3	chr20	antisense	--
IntronR	novel_IR_5097	chr20	63744728	63745528	+	ENST00000447343.2	novel	0.27	0.57	2.09	y	0.4	0.37	0.91	n	0.38	1.2	3.17	y	0.99	0.28	0.28	n	0.69	0.42	0.6	n	0.71	0.8	1.13	y	0.0297703	4.25665	up	ENSG00000229299.2	RP4-583P15.10	chr20	antisense	--
IntronR	novel_IR_5221	chr22	20086683	20087162	+	ENST00000351989.7	novel	0	0	10.96	n	0.05	0.29	5.92	n	0	0	9.59	n	0.14	1.01	7.1	n	0.21	1.15	5.47	n	0.22	1.55	7.14	y	0.00695093	5.74244	up	ENSG00000128191.13	DGCR8	chr22	protein_coding	DGCR8 microprocessor complex subunit
IntronR	novel_IR_5222	chr22	20111259	20111789	-	ENST00000412713.1	novel	0.33	0.33	1.02	n	0.17	0.19	1.13	n	0.49	0.15	0.31	n	1	0.35	0	n	1.24	0.81	0.65	y	0.73	0.83	1.13	y	0.0262477	3.79578	up	ENSG00000243762.1	AC006547.8	chr22	antisense	--
IntronR	novel_IR_5233	chr22	20704040	20704188	+	ENST00000450925.6	novel	0.3	9.29	30.82	y	0.27	7.93	29.38	y	0.33	18.13	54.8	y	0.36	11.67	32.67	y	0.38	12.57	33.38	y	0.43	19.23	44.66	y	0.0307499	3.32347	up	ENSG00000226287.7	TMEM191A	chr22	processed_transcript	transmembrane protein 191A (pseudogene)
IntronR	novel_IR_5234	chr22	20704056	20704188	+	ENST00000445836.5	novel	0.28	8.27	29.21	y	0.25	7.03	27.64	y	0.33	17.12	51.3	y	0.38	11.46	30.3	y	0.36	11.54	31.85	y	0.46	19.17	41.59	y	0.0456914	2.94817	up	ENSG00000226287.7	TMEM191A	chr22	processed_transcript	transmembrane protein 191A (pseudogene)
IntronR	novel_IR_5617	chr3	33439925	33440334	-	ENST00000283628.9	novel	0.81	1.01	1.25	y	0	0	0.28	n	0.42	1.17	2.78	y	0.99	1.38	1.39	y	1.72	5.26	3.07	y	1.65	4.09	2.47	n	0.0340745	3.16339	up	ENSG00000153560.11	UBP1	chr3	protein_coding	upstream binding protein 1 (LBP-1a)
IntronR	novel_IR_6005	chr5	132752181	132760802	-	ENST00000378719.6	novel	3.59	59.31	16.52	y	3.68	62.5	16.99	y	3.57	89.56	25.07	y	3.76	65.2	17.32	y	3.8	62.64	16.51	y	3.74	70.67	18.91	y	0.027447	4.01904	up	ENSG00000164402.13	2021-09-08	chr5	protein_coding	septin 8
IntronR	novel_IR_6119	chr5	177404413	177404499	-	ENST00000253496.3	novel	0.37	7.92	21.66	y	0.39	8.71	22.52	y	0.29	11	38.57	y	0.56	13.21	23.68	y	0.6	11.72	19.55	y	0.65	14.16	21.84	y	0.00350282	6.31146	up	ENSG00000131187.9	F12	chr5	protein_coding	coagulation factor XII (Hageman factor)
IntronR	novel_IR_6312	chr6	152308628	152309831	-	ENST00000423061.5	novel	0.07	0.25	3.8	n	0.07	0.24	3.42	n	0	0.03	7.45	n	0.26	0.98	3.82	y	0.16	0.6	3.81	n	0.19	0.5	2.65	n	0.0158688	4.15425	up	ENSG00000131018.22	SYNE1	chr6	protein_coding	spectrin repeat containing, nuclear envelope 1
IntronR	novel_IR_6362	chr6	26092641	26092727	+	ENST00000470149.5	novel	0.48	5.2	10.86	y	0.44	3.08	7.07	y	0.36	7.26	20.22	y	0.73	5.93	8.16	y	0.93	7.74	8.33	y	0.64	3.07	4.79	y	0.0427594	3.66869	up	ENSG00000010704.18	HFE	chr6	protein_coding	hemochromatosis
IntronR	novel_IR_6370	chr6	26422197	26422933	+	ENST00000465856.5	novel	0.04	0.1	2.64	n	0.17	0.48	2.92	n	0.04	0.26	5.79	n	0.41	0.85	2.05	y	0.38	0.67	1.76	y	0.43	2.41	5.65	y	0.0110268	7.07445	up	ENSG00000124549.14	BTN2A3P	chr6	transcribed_unprocessed_pseudogene	butyrophilin, subfamily 2, member A3, pseudogene
IntronR	novel_IR_6427	chr6	32182899	32183958	-	ENST00000375065.6	novel	0.36	2.33	6.44	y	0.42	2.93	6.91	n	0.31	3.92	12.74	y	0.56	2.73	4.83	y	0.61	3.48	5.71	y	0.51	2.81	5.51	y	0.0104127	4.57929	up	ENSG00000204305.13	AGER	chr6	protein_coding	advanced glycosylation end product-specific receptor
IntronR	novel_IR_6553	chr7	100682777	100683012	-	ENST00000275732.5	novel	0.13	1.12	8.53	n	0.14	1.26	9.07	n	0.08	1.09	13.31	n	0.18	1.71	9.57	n	0.22	2.4	10.98	y	0.18	2.35	13.21	n	0.0329613	3.35489	up	ENSG00000146830.9	GIGYF1	chr7	protein_coding	GRB10 interacting GYF protein 1
IntronR	novel_IR_6571	chr7	106112211	106112479	-	ENST00000011473.6	novel	0.22	22.81	103.05	y	0.21	30.53	147.99	y	0.23	42.87	185.46	y	0.24	32.38	136.34	y	0.26	37.57	146.55	y	0.27	38.83	143.46	y	0.0321988	3.47851	up	ENSG00000008282.7	SYPL1	chr7	protein_coding	synaptophysin-like 1
IntronR	novel_IR_6972	chr8	144512837	144513606	+	ENST00000580385.1	novel	0.57	2.83	4.96	y	0.31	2.71	8.88	y	0.67	5	7.45	y	1.01	3.77	3.74	y	1.06	4.97	4.69	y	1.02	5.26	5.15	y	0.0386698	4.73678	up	ENSG00000265393.1	CTD-2517M22.17	chr8	antisense	--
IntronR	novel_IR_7002	chr8	29527420	29529791	+	ENST00000521101.1	novel	0.23	0.2	0.87	n	0.23	0.19	0.83	n	0.32	0.32	0.98	y	1.53	0.47	0.31	n	0.81	0.19	0.23	n	1.09	0.88	0.81	n	0.0493498	4.17284	up	ENSG00000253632.1	RP11-486M23.1	chr8	lincRNA	--
IntronR	novel_IR_7040	chr8	70162854	70163465	-	ENST00000452400.6	novel	0	0	0.62	n	0	0	2.85	n	0.09	0.61	7.01	n	1	1.79	0	n	1.01	1.45	1.43	n	1.9	1.08	0.57	y	0.0494566	4.24654	up	ENSG00000140396.12	NCOA2	chr8	protein_coding	nuclear receptor coactivator 2
IntronR	novel_IR_7133	chr9	128250940	128254654	+	ENST00000627061.2	novel	0.12	1.16	9.6	n	0.12	1.22	10.57	n	0.14	2.48	17.32	n	0.18	1.83	9.9	n	0.19	2.92	15.64	n	0.2	1.65	8.09	y	0.00215026	7.18132	up	ENSG00000106976.18	DNM1	chr9	protein_coding	dynamin 1
IntronR	novel_IR_7176	chr9	133257542	133258097	-	ENST00000611156.4	novel	0	0	0.02	n	-	-	-	-	0.41	0.29	0.69	y	2.82	0.51	0.18	n	-	-	-	-	2.51	0.87	0.35	y	0.0134818	9.57191	up	ENSG00000175164.13	ABO	chr9	protein_coding	ABO blood group (transferase A, alpha 1-3-N-acetylgalactosaminyltransferase; transferase B, alpha 1-3-galactosyltransferase)
IntronR	novel_IR_7231	chr9	137188778	137189066	+	ENST00000322310.9	novel	0.26	123.7	470.14	y	0.26	168.06	638.99	y	0.28	232.39	818.66	y	0.29	164.16	559.51	y	0.3	188.49	630.83	y	0.29	198.98	676.4	y	0.038561	3.57771	up	ENSG00000176101.11	SSNA1	chr9	protein_coding	Sjogren syndrome nuclear autoantigen 1
IntronR	novel_IR_7266	chr9	33922525	33922530	-	ENST00000539807.5	novel	0.85	156.5	183.33	y	0.85	159.5	188.42	y	0.87	260.75	299.36	y	0.99	209.25	210.43	y	0.97	238.75	246.78	y	0.93	241.25	258.37	y	0.0165506	5.65685	up	ENSG00000137073.20	UBAP2	chr9	protein_coding	ubiquitin associated protein 2
IntronR	novel_IR_7302	chr9	5769256	5770087	+	ENST00000418622.7	novel	0.14	2.4	16.72	n	0.1	0.96	9.32	n	0.06	1.44	22.89	n	0.16	1.79	11.19	n	0.2	2.07	10.47	n	0.21	2.87	13.66	y	0.0385508	3.25042	up	ENSG00000107036.11	RIC1	chr9	protein_coding	RAB6A GEF complex partner 1
IntronR	novel_IR_7332	chr9	89037526	89037993	-	ENST00000375831.1	novel	0.05	0.24	4.93	n	0	0	1.87	n	0	0	2.96	n	0.27	0.62	2.31	y	0.27	1.38	5.01	n	0.36	1.26	3.54	n	0.0031838	8.25593	up	ENSG00000148082.9	SHC3	chr9	protein_coding	SHC (Src homology 2 domain containing) transforming protein 3
IntronR	novel_IR_7360	chr9	98084466	98087442	-	ENST00000342043.3	novel	6.07	39.5	6.51	y	5.79	41.75	7.21	y	5.71	59.8	10.47	y	7.55	45.83	6.07	y	7.41	52.24	7.05	y	6.62	50.22	7.59	y	0.0313953	4.32033	up	ENSG00000106785.14	TRIM14	chr9	protein_coding	tripartite motif containing 14
IntronR	novel_IR_7426	chrX	153794585	153794674	+	ENST00000320857.7	novel	0.53	91.33	171.04	y	0.58	131.99	226.13	y	0.57	168.24	295.14	y	0.61	127.15	207.25	y	0.61	136.86	224.94	y	0.65	165.76	256.33	y	0.0362882	3.12358	up	ENSG00000180879.13	SSR4	chrX	protein_coding	signal sequence receptor, delta
[truncated: 4 more columns]
